# Supplementary material for: Leisure Activities and Their Relationship With MRI Measures of Brain Structure, Functional Connectivity, and Cognition in the UK Biobank Cohort
Source: Front Aging Neurosci. 2021 Nov 16;13:734866. doi: 10.3389/fnagi.2021.734866 (PMC8635062; doi:10.3389/fnagi.2021.734866)
Supplement: Supplementary file 4 [file Data_Sheet_4.xlsx]

## Sheet: MRI results final
Table S6: The results of all linear regression models conducted to examine the association between leisure activities and MRI measures of grey matter volume (GM), white matter (WM) microstructure and resting state functional connectivity. Group 1 = Weekly to low engagement; group 2 = low to weekly engagement; group 3 = stable weekly engagement. Note that the low stable group served as the referen…
Dependent Variable	Term	β	conf.low	conf.high	p-value	FDR q-value
Connectivity between SMN3 and CN	Sports club/gym attendance (group 3)	0.123698	0.0710629	0.176333	4.15793e-06	0.0203742
Connectivity between SMN3 and lateral VN2	Sports club/gym attendance (group 3)	0.122999	0.0693396	0.176658	7.11886e-06	0.0203742
Volume of GM in occipital pole	Family and friend visits (group 3)	0.144425	0.0781716	0.210678	1.9516e-05	0.0372366
Volume of putamen	Leisure-time computer use (group 3)	0.22436	0.115837	0.332883	5.11644e-05	0.0732163
Connectivity between AN and CN	Sports club/gym attendance (group 3)	0.0973029	0.0437589	0.150847	0.00036995	0.302513
Volume of putamen	Leisure-time computer use (group 1)	0.285094	0.130984	0.439203	0.000289369	0.302513
Weighted mean FA in tract posterior thalamic radiation	Religious activities (group 2)	-0.238114	-0.367743	-0.108485	0.000319334	0.302513
Connectivity between SMN2 and SMN3	Sports club/gym attendance (group 3)	0.0933271	0.0397436	0.146911	0.000643085	0.40122
Connectivity between SMN and medial VN2	Religious activities (group 2)	-0.225916	-0.360487	-0.0913447	0.00100349	0.40122
Connectivity between SMN3 and BGN	Sports club/gym attendance (group 3)	-0.088822	-0.142069	-0.0355752	0.00108056	0.40122
Connectivity between SMN2 and ECN	Religious activities (group 2)	0.220727	0.0874761	0.353979	0.00117093	0.40122
Connectivity between posterior DMN2 and AN2	Family and friend visits (group 1)	-0.179479	-0.287996	-0.0709622	0.0011916	0.40122
Volume of GM in inferior temporal gyrus posterior division	Adult educational classes (group 2)	-0.137103	-0.219108	-0.0550988	0.00105263	0.40122
Volume of GM in insular cortex	Leisure-time computer use (group 3)	0.171701	0.0702513	0.273151	0.000912019	0.40122
Volume of GM in lingual gyrus	Pubs/social clubs (group 2)	0.102637	0.0418226	0.16345	0.000942892	0.40122
Volume of GM in occipital fusiform gyrus	Pubs/social clubs (group 1)	0.118796	0.049304	0.188288	0.000809073	0.40122
Volume of hippocampus	Leisure-time computer use (group 3)	0.220218	0.0941156	0.34632	0.000622017	0.40122
Connectivity between AN and SMN3	Sports club/gym attendance (group 3)	0.0854327	0.0324342	0.138431	0.0015845	0.403367
Connectivity between left FPN and ECN	Sports club/gym attendance (group 3)	-0.0863348	-0.140186	-0.0324838	0.00168038	0.403367
Connectivity between AN and AN2	Sports club/gym attendance (group 3)	0.0858953	0.0323155	0.139475	0.00168138	0.403367
Connectivity between AN and lateral VN2	Pubs/social clubs (group 2)	-0.134634	-0.218681	-0.0505878	0.00169523	0.403367
Connectivity between anterior DMN and BGN	Religious activities (group 3)	0.0924071	0.0338594	0.150955	0.00198256	0.403367
Connectivity between SMN and posterior DMN2	Pubs/social clubs (group 3)	0.0950311	0.0347151	0.155347	0.00201909	0.403367
Connectivity between anterior DMN and lateral VN2	Adult educational classes (group 1)	0.135314	0.0492009	0.221428	0.00207571	0.403367
Connectivity between right FPN and right CON	Religious activities (group 3)	0.0920759	0.0333508	0.150801	0.00212309	0.403367
Connectivity between SMN2 and right CON	Sports club/gym attendance (group 2)	0.1185	0.0423578	0.194642	0.00229065	0.403367
Connectivity between posterior DMN2 and AN2	Sports club/gym attendance (group 3)	0.0827479	0.0292687	0.136227	0.00242885	0.403367
Connectivity between anterior DMN and lateral VN	Pubs/social clubs (group 2)	0.127976	0.0438095	0.212144	0.00288615	0.403367
Connectivity between right FPN and anterior DMN2	Sports club/gym attendance (group 3)	-0.0820884	-0.136081	-0.0280961	0.00288864	0.403367
Volume of accumbens	Leisure-time computer use (group 1)	0.269453	0.0923141	0.446592	0.00287449	0.403367
Volume of GM in frontal operculum cortex	Leisure-time computer use (group 3)	0.201198	0.0784975	0.323898	0.00131301	0.403367
Volume of GM in frontal operculum cortex	Leisure-time computer use (group 2)	0.209097	0.0712216	0.346972	0.00295971	0.403367
Volume of GM in iiv cerebellum	Family and friend visits (group 1)	-0.160688	-0.260908	-0.0604681	0.00167884	0.403367
Volume of GM in inferior frontal gyrus pars opercularis	Pubs/social clubs (group 3)	-0.0865253	-0.140951	-0.0320997	0.00183764	0.403367
Volume of GM in occipital fusiform gyrus	Religious activities (group 3)	-0.0756737	-0.124729	-0.0266183	0.00250355	0.403367
Volume of GM in occipital pole	Family and friend visits (group 1)	0.138143	0.0472592	0.229027	0.00289556	0.403367
Volume of GM in precentral gyrus	Leisure-time computer use (group 3)	0.171274	0.0590542	0.283494	0.00278218	0.403367
Volume of GM in vermis viib cerebellum	Pubs/social clubs (group 3)	-0.0879215	-0.145448	-0.0303953	0.00274429	0.403367
Volume of putamen	Religious activities (group 3)	-0.0728627	-0.117591	-0.0281339	0.00141267	0.403367
Weighted mean FA in tract acoustic radiation	Leisure-time computer use (group 3)	-0.213096	-0.352909	-0.0732826	0.00281972	0.403367
Weighted mean MD in tract acoustic radiation	Leisure-time computer use (group 1)	0.310426	0.109877	0.510976	0.00241964	0.403367
Weighted mean MD in tract middle cerebellar peduncle	Leisure-time computer use (group 3)	-0.20999	-0.348404	-0.0715749	0.00294954	0.403367
Connectivity between lateral VN and AN2	Sports club/gym attendance (group 3)	-0.0802594	-0.13335	-0.0271689	0.00305197	0.406267
Connectivity between medial VN and right CON	Pubs/social clubs (group 3)	0.091112	0.0306929	0.151531	0.00312548	0.406597
Connectivity between AN and lateral VN2	Sports club/gym attendance (group 3)	0.0805313	0.026455	0.134608	0.00351912	0.425857
Connectivity between SMN2 and anterior DMN2	Family and friend visits (group 1)	0.162969	0.0533283	0.272609	0.00358204	0.425857
Connectivity between posterior DMN and precuneus/ PCC DMN	Pubs/social clubs (group 1)	-0.122249	-0.204939	-0.0395589	0.00376575	0.425857
Connectivity between SMN and SMN3	Sports club/gym attendance (group 3)	-0.0771611	-0.129441	-0.0248812	0.00382438	0.425857
Connectivity between posterior DMN and precuneus/ PCC DMN	Religious activities (group 3)	0.0858474	0.0274692	0.144226	0.00395471	0.425857
Connectivity between anterior DMN and lateral VN	Family and friend visits (group 2)	-0.153978	-0.258713	-0.0492431	0.00396384	0.425857
Connectivity between AN2 and right CON	Family and friend visits (group 3)	-0.117292	-0.197336	-0.0372489	0.00408394	0.425857
Connectivity between SMN2 and right CON	Family and friend visits (group 1)	0.16006	0.0507224	0.269398	0.00412085	0.425857
Connectivity between left CON and anterior DMN2	Sports club/gym attendance (group 3)	0.0791352	0.0250518	0.133219	0.0041387	0.425857
Connectivity between left FPN and BGN	Adult educational classes (group 2)	-0.142414	-0.239777	-0.0450512	0.00415133	0.425857
Connectivity between anterior DMN and precuneus/ PCC DMN	Sports club/gym attendance (group 3)	0.077193	0.024407	0.129979	0.00415999	0.425857
Connectivity between posterior DMN2 and SMN3	Sports club/gym attendance (group 3)	0.0783894	0.0245884	0.13219	0.00429984	0.425857
Connectivity between ECN and precuneus/ PCC DMN	Sports club/gym attendance (group 2)	-0.1099	-0.185651	-0.0341484	0.00446795	0.425857
Connectivity between anterior DMN and posterior DMN	Pubs/social clubs (group 1)	-0.120204	-0.203063	-0.0373455	0.00447017	0.425857
Connectivity between SMN2 and anterior DMN2	Sports club/gym attendance (group 3)	0.0783481	0.0243196	0.132377	0.00448634	0.425857
Connectivity between left CON and anterior DMN2	Leisure-time computer use (group 3)	-0.206578	-0.34928	-0.0638766	0.00455582	0.425857
Connectivity between AN and BGN	Family and friend visits (group 3)	-0.115187	-0.194963	-0.035412	0.00466107	0.425857
Connectivity between SMN and posterior DMN2	Pubs/social clubs (group 1)	0.120158	0.0368462	0.203469	0.00470765	0.425857
Volume of accumbens	Leisure-time computer use (group 3)	0.18092	0.0561801	0.30566	0.00447943	0.425857
Weighted mean FA in tract anterior thalamic radiation	Adult educational classes (group 3)	-0.154234	-0.261499	-0.0469683	0.0048359	0.425857
Weighted mean MD in tract posterior thalamic radiation	Religious activities (group 2)	0.174749	0.0533937	0.296105	0.00477409	0.425857
Connectivity between left CON and right CON	Adult educational classes (group 2)	-0.138555	-0.235547	-0.0415631	0.00511885	0.443944
Connectivity between CN and AN2	Sports club/gym attendance (group 3)	0.0760385	0.0225897	0.129487	0.0053044	0.44431
Connectivity between BGN and precuneus/ PCC DMN	Adult educational classes (group 1)	-0.122518	-0.208817	-0.0362184	0.00540009	0.44431
Connectivity between posterior DMN2 and AN2	Family and friend visits (group 3)	-0.112235	-0.191342	-0.0331278	0.00542989	0.44431
Connectivity between anterior DMN and AN	Adult educational classes (group 3)	0.159256	0.0465404	0.271971	0.00562521	0.44431
Connectivity between anterior DMN2 and CN	Family and friend visits (group 3)	-0.112104	-0.191494	-0.0327143	0.0056533	0.44431
Connectivity between anterior DMN2 and right CON	Family and friend visits (group 3)	-0.111611	-0.190673	-0.0325488	0.00566642	0.44431
Volume of GM in precentral gyrus	Leisure-time computer use (group 2)	0.178051	0.0519516	0.30415	0.00565608	0.44431
Connectivity between precuneus/ PCC DMN and right CON	Sports club/gym attendance (group 3)	-0.0761882	-0.130355	-0.0220216	0.00584358	0.447334
Connectivity between medial VN2 and lateral VN2	Sports club/gym attendance (group 3)	0.0754741	0.0217959	0.129152	0.0058613	0.447334
Connectivity between posterior DMN and BGN	Pubs/social clubs (group 1)	0.116623	0.0331757	0.200071	0.00616597	0.464395
Volume of GM in supracalcarine cortex	Religious activities (group 2)	-0.164268	-0.282111	-0.0464253	0.00629962	0.468299
Connectivity between medial VN and lateral VN2	Pubs/social clubs (group 3)	0.0837513	0.0234856	0.144017	0.00646094	0.468773
Connectivity between left CON and anterior DMN2	Adult educational classes (group 1)	-0.119628	-0.205847	-0.0334087	0.00654627	0.468773
Connectivity between CN and AN2	Adult educational classes (group 2)	0.133315	0.0372215	0.229408	0.00655168	0.468773
Connectivity between SMN3 and right CON	Family and friend visits (group 1)	0.150245	0.0416936	0.258796	0.00667906	0.471987
Connectivity between right FPN and AN2	Pubs/social clubs (group 3)	0.0826759	0.0226235	0.142728	0.00697547	0.480115
Connectivity between BGN and precuneus/ PCC DMN	Religious activities (group 2)	-0.184997	-0.319892	-0.0501016	0.00719679	0.480115
Connectivity between SMN and right CON	Sports club/gym attendance (group 3)	-0.0739427	-0.127876	-0.02001	0.00721348	0.480115
Volume of GM in v cerebellum	Family and friend visits (group 3)	-0.0972224	-0.167943	-0.0265019	0.00705744	0.480115
Volume of pallidum	Pubs/social clubs (group 3)	-0.0730529	-0.126177	-0.0199292	0.00704064	0.480115
Volume of GM in occipital fusiform gyrus	Pubs/social clubs (group 2)	0.0957942	0.0256197	0.165969	0.0074683	0.491363
Connectivity between right FPN and precuneus/ PCC DMN	Pubs/social clubs (group 1)	-0.113009	-0.196107	-0.0299123	0.00769467	0.492504
Connectivity between left FPN and SMN2	Sports club/gym attendance (group 3)	0.0732057	0.019201	0.12721	0.00789529	0.492504
Connectivity between CN and right CON	Pubs/social clubs (group 2)	-0.113576	-0.197385	-0.0297662	0.00791262	0.492504
Connectivity between SMN2 and ECN	Adult educational classes (group 2)	0.130364	0.0341612	0.226567	0.00791585	0.492504
Weighted mean FA in tract inferior longitudinal fasciculus	Religious activities (group 2)	-0.175429	-0.30483	-0.0460279	0.00788807	0.492504
Volume of thalamus	Sports club/gym attendance (group 3)	0.0501869	0.0129548	0.0874191	0.00825072	0.507818
Connectivity between anterior DMN and lateral VN	Sports club/gym attendance (group 3)	-0.0728955	-0.12705	-0.0187406	0.00834136	0.507935
Connectivity between lateral VN and BGN	Religious activities (group 2)	0.181448	0.0464091	0.316487	0.0084569	0.509551
Connectivity between anterior DMN2 and BGN	Religious activities (group 3)	0.0779807	0.0193286	0.136633	0.00917149	0.516486
Connectivity between SMN and CN	Sports club/gym attendance (group 3)	0.07156	0.0176582	0.125462	0.00927416	0.516486
Connectivity between SMN3 and left CON	Sports club/gym attendance (group 3)	-0.0712926	-0.12502	-0.0175655	0.00930911	0.516486
Connectivity between medial VN2 and left CON	Pubs/social clubs (group 3)	-0.0793776	-0.139449	-0.019306	0.0096087	0.516486
Connectivity between lateral VN and AN	Religious activities (group 2)	-0.177731	-0.31266	-0.0428021	0.00983871	0.516486
Connectivity between SMN and posterior DMN2	Leisure-time computer use (group 3)	-0.187835	-0.33071	-0.0449602	0.0099813	0.516486
Connectivity between lateral VN and SMN2	Religious activities (group 3)	-0.076905	-0.135476	-0.0183339	0.0100757	0.516486
Connectivity between SMN and medial VN2	Adult educational classes (group 1)	-0.112475	-0.198595	-0.0263551	0.0104816	0.516486
Connectivity between medial VN and medial VN2	Adult educational classes (group 1)	-0.112195	-0.198316	-0.0260735	0.0106766	0.516486
Connectivity between SMN3 and anterior DMN2	Leisure-time computer use (group 3)	-0.18497	-0.32732	-0.04262	0.0108795	0.516486
Connectivity between SMN and posterior DMN2	Religious activities (group 2)	-0.17512	-0.310052	-0.0401872	0.0109758	0.516486
Connectivity between right FPN and right CON	Sports club/gym attendance (group 3)	-0.0701431	-0.124194	-0.0160919	0.0109829	0.516486
Connectivity between anterior DMN and posterior DMN	Family and friend visits (group 1)	-0.141744	-0.251004	-0.0324836	0.0110083	0.516486
Global GM volume	Pubs/social clubs (group 3)	-0.0381505	-0.0674718	-0.00882924	0.010775	0.516486
Volume of GM in angular gyrus	Family and friend visits (group 1)	0.128761	0.0314915	0.226031	0.00947979	0.516486
Volume of GM in inferior temporal gyrus temporooccipital part	Pubs/social clubs (group 3)	0.0680871	0.016932	0.119242	0.00909586	0.516486
Volume of GM in lateral occipital cortex superior division	Religious activities (group 2)	0.139801	0.0341538	0.245448	0.00950539	0.516486
Volume of GM in paracingulate gyrus	Family and friend visits (group 1)	0.115439	0.0270933	0.203785	0.0104434	0.516486
Volume of GM in paracingulate gyrus	Family and friend visits (group 3)	0.0840797	0.019677	0.148483	0.010511	0.516486
Volume of GM in precuneous cortex	Family and friend visits (group 1)	0.110012	0.0278401	0.192184	0.00869744	0.516486
Volume of GM in ventral striatum	Pubs/social clubs (group 3)	-0.0669663	-0.117637	-0.0162953	0.00959731	0.516486
Volume of GM in vi cerebellum	Pubs/social clubs (group 2)	0.0926959	0.0213124	0.164079	0.0109309	0.516486
Weighted mean FA in tract inferior frontooccipital fasciculus	Religious activities (group 2)	-0.171722	-0.301833	-0.0416105	0.00969517	0.516486
Weighted mean MD in tract acoustic radiation	Leisure-time computer use (group 3)	0.188245	0.0470191	0.329471	0.0089953	0.516486
Weighted mean MD in tract forceps major	Pubs/social clubs (group 2)	-0.110348	-0.194286	-0.0264108	0.00998318	0.516486
Weighted mean MD in tract middle cerebellar peduncle	Family and friend visits (group 2)	-0.131849	-0.233336	-0.0303621	0.0108936	0.516486
Weighted mean MD in tract uncinate fasciculus	Pubs/social clubs (group 3)	0.0753284	0.0187564	0.1319	0.00906703	0.516486
Connectivity between left CON and BGN	Religious activities (group 3)	-0.0759507	-0.134779	-0.0171224	0.0113998	0.518603
Connectivity between anterior DMN and posterior DMN	Religious activities (group 3)	0.0755025	0.0170006	0.134004	0.011429	0.518603
Connectivity between medial VN and posterior DMN	Adult educational classes (group 3)	-0.145251	-0.257842	-0.0326598	0.0114625	0.518603
Connectivity between posterior DMN2 and right CON	Family and friend visits (group 2)	0.135023	0.0303044	0.239741	0.0115064	0.518603
Volume of GM in v cerebellum	Family and friend visits (group 1)	-0.125114	-0.222126	-0.0281015	0.0114884	0.518603
Volume of GM in viiia cerebellum	Pubs/social clubs (group 3)	-0.0687856	-0.122394	-0.0151776	0.011915	0.528694
Weighted mean MD in tract cingulate gyrus part of cingulum	Adult educational classes (group 3)	0.141265	0.0312679	0.251262	0.0118397	0.528694
Global WM volume	Sports club/gym attendance (group 3)	0.0347051	0.00761972	0.0617904	0.0120346	0.529891
Volume of GM in brainstem	Sports club/gym attendance (group 3)	0.0620918	0.0135666	0.110617	0.0121515	0.530958
Connectivity between right FPN and right CON	Sports club/gym attendance (group 1)	-0.096173	-0.171512	-0.0208342	0.0123577	0.534295
Volume of GM in inferior frontal gyrus pars triangularis	Leisure-time computer use (group 3)	0.166553	0.0359959	0.29711	0.0124146	0.534295
Connectivity between anterior DMN and right CON	Sports club/gym attendance (group 3)	-0.0687308	-0.122731	-0.0147305	0.0126168	0.538944
Connectivity between posterior DMN and SMN3	Adult educational classes (group 2)	-0.122619	-0.219639	-0.0256003	0.0132515	0.554684
Connectivity between medial VN2 and AN	Religious activities (group 2)	0.167739	0.034751	0.300727	0.0134388	0.554684
Connectivity between medial VN and ECN	Adult educational classes (group 3)	0.141084	0.029185	0.252983	0.0134752	0.554684
Connectivity between AN2 and right CON	Pubs/social clubs (group 1)	-0.104917	-0.188201	-0.0216332	0.0135538	0.554684
Connectivity between lateral VN and anterior DMN2	Sports club/gym attendance (group 1)	0.0944082	0.0189416	0.169875	0.0142177	0.554684
Connectivity between SMN2 and CN	Sports club/gym attendance (group 3)	0.0667423	0.0133484	0.120136	0.0142948	0.554684
Connectivity between medial VN2 and posterior DMN2	Family and friend visits (group 3)	0.0999951	0.0199106	0.18008	0.0144025	0.554684
Connectivity between posterior DMN and posterior DMN2	Adult educational classes (group 3)	-0.139972	-0.252171	-0.0277741	0.0144868	0.554684
Connectivity between SMN2 and SMN3	Adult educational classes (group 1)	0.106541	0.0210963	0.191986	0.0145377	0.554684
Volume of accumbens	Sports club/gym attendance (group 1)	-0.0821836	-0.148107	-0.0162604	0.0145568	0.554684
Global GM volume	Leisure-time computer use (group 3)	0.086451	0.0170137	0.155888	0.0146865	0.554684
Volume of GM in cingulate gyrus posterior division	Leisure-time computer use (group 1)	0.180744	0.0355814	0.325907	0.0146792	0.554684
Volume of GM in planum polare	Sports club/gym attendance (group 3)	-0.0531323	-0.0957692	-0.0104953	0.0145966	0.554684
Volume of GM in precuneous cortex	Religious activities (group 3)	-0.0548845	-0.0988879	-0.010881	0.0145079	0.554684
Volume of GM in temporal pole	Leisure-time computer use (group 3)	0.140148	0.027423	0.252873	0.0148265	0.554684
Volume of GM in vermis vi cerebellum	Pubs/social clubs (group 3)	-0.0720984	-0.129339	-0.0148582	0.013567	0.554684
Volume of GM in viib cerebellum	Religious activities (group 2)	0.152014	0.0297751	0.274253	0.0148017	0.554684
Weighted mean FA in tract acoustic radiation	Leisure-time computer use (group 1)	-0.251348	-0.449892	-0.0528037	0.0131006	0.554684
Weighted mean MD in tract superior thalamic radiation	Family and friend visits (group 2)	-0.1207	-0.217441	-0.0239582	0.0144785	0.554684
Volume of GM in vi cerebellum	Pubs/social clubs (group 3)	-0.0634127	-0.11459	-0.0122349	0.0151677	0.563766
Connectivity between SMN and CN	Family and friend visits (group 3)	0.0986854	0.0189442	0.178427	0.0152906	0.564669
Connectivity between medial VN2 and precuneus/ PCC DMN	Religious activities (group 2)	-0.166694	-0.30167	-0.0317181	0.0155049	0.56688
Connectivity between AN2 and lateral VN2	Sports club/gym attendance (group 3)	0.0666771	0.0126501	0.120704	0.0155759	0.56688
Connectivity between left FPN and AN2	Adult educational classes (group 1)	-0.106363	-0.192619	-0.0201069	0.0156629	0.56688
Connectivity between left CON and anterior DMN2	Leisure-time computer use (group 2)	-0.196942	-0.357293	-0.0365912	0.0160819	0.56688
Connectivity between medial VN and lateral VN2	Pubs/social clubs (group 1)	0.102157	0.0189149	0.185399	0.0161655	0.56688
Connectivity between SMN3 and BGN	Adult educational classes (group 1)	-0.10415	-0.189072	-0.0192281	0.0162355	0.56688
Connectivity between posterior DMN and lateral VN2	Sports club/gym attendance (group 3)	-0.0662669	-0.120403	-0.0121305	0.016441	0.56688
Connectivity between precuneus/ PCC DMN and right CON	Leisure-time computer use (group 1)	0.24846	0.0454718	0.451449	0.0164463	0.56688
Connectivity between lateral VN2 and precuneus/ PCC DMN	Leisure-time computer use (group 2)	0.194643	0.0346403	0.354645	0.0171191	0.56688
Connectivity between SMN and precuneus/ PCC DMN	Adult educational classes (group 3)	-0.13736	-0.250302	-0.0244175	0.0171469	0.56688
Connectivity between right FPN and posterior DMN	Sports club/gym attendance (group 1)	-0.0914285	-0.166865	-0.0159923	0.0175336	0.56688
Connectivity between left FPN and AN	Leisure-time computer use (group 3)	-0.172777	-0.315605	-0.0299477	0.017751	0.56688
Connectivity between lateral VN and SMN2	Family and friend visits (group 3)	-0.0962672	-0.176029	-0.0165051	0.018011	0.56688
Connectivity between SMN and medial VN2	Pubs/social clubs (group 3)	0.0725205	0.0123172	0.132724	0.0182347	0.56688
Connectivity between lateral VN and SMN2	Family and friend visits (group 1)	-0.131758	-0.241173	-0.0223431	0.0182722	0.56688
Connectivity between medial VN and posterior DMN2	Religious activities (group 3)	-0.0703072	-0.128793	-0.0118211	0.0184747	0.56688
Connectivity between AN and AN2	Leisure-time computer use (group 3)	0.169916	0.0285461	0.311286	0.0184934	0.56688
Connectivity between SMN3 and right CON	Pubs/social clubs (group 3)	-0.0715471	-0.131171	-0.0119229	0.0186851	0.56688
Connectivity between SMN2 and ECN	Sports club/gym attendance (group 3)	0.0642045	0.0106845	0.117724	0.0187177	0.56688
Volume of GM in central opercular cortex	Adult educational classes (group 1)	0.0790056	0.0139752	0.144036	0.0172651	0.56688
Volume of GM in crus i cerebellum	Pubs/social clubs (group 3)	-0.0637556	-0.116488	-0.0110228	0.0178117	0.56688
Volume of GM in frontal pole	Adult educational classes (group 2)	-0.0781977	-0.143359	-0.0130364	0.0186757	0.56688
Volume of GM in iiv cerebellum	Family and friend visits (group 3)	-0.0890186	-0.162078	-0.0159597	0.0169422	0.56688
Volume of GM in inferior frontal gyrus pars opercularis	Sports club/gym attendance (group 1)	0.0827624	0.0146664	0.150858	0.0172215	0.56688
Volume of GM in inferior temporal gyrus anterior division	Leisure-time computer use (group 1)	0.216626	0.036538	0.396714	0.0183995	0.56688
Volume of GM in postcentral gyrus	Family and friend visits (group 3)	0.0790612	0.0131972	0.144925	0.0186456	0.56688
Volume of GM in vermis vi cerebellum	Pubs/social clubs (group 2)	0.0976698	0.0178304	0.177509	0.0165065	0.56688
Weighted mean FA in tract acoustic radiation	Leisure-time computer use (group 2)	-0.189566	-0.346671	-0.0324604	0.0180409	0.56688
Weighted mean FA in tract forceps major	Family and friend visits (group 2)	0.12678	0.022161	0.231399	0.0175496	0.56688
Weighted mean FA in tract parahippocampal part of cingulum	Pubs/social clubs (group 3)	0.0721775	0.0133787	0.130976	0.0161391	0.56688
Weighted mean MD in tract forceps minor	Religious activities (group 2)	0.156709	0.0263545	0.287064	0.018469	0.56688
Weighted mean MD in tract inferior frontooccipital fasciculus	Adult educational classes (group 2)	0.108384	0.0182937	0.198475	0.0183831	0.56688
Weighted mean MD in tract inferior longitudinal fasciculus	Family and friend visits (group 1)	-0.12634	-0.229082	-0.0235974	0.0159545	0.56688
Weighted mean MD in tract middle cerebellar peduncle	Family and friend visits (group 1)	-0.129774	-0.236248	-0.0232997	0.0169078	0.56688
Connectivity between AN and ECN	Family and friend visits (group 2)	-0.124984	-0.229782	-0.0201849	0.0194219	0.569773
Connectivity between left FPN and precuneus/ PCC DMN	Adult educational classes (group 2)	0.115444	0.018512	0.212376	0.0195881	0.569773
Connectivity between SMN2 and left CON	Family and friend visits (group 1)	-0.130455	-0.240083	-0.0208272	0.0196908	0.569773
Connectivity between AN2 and right CON	Family and friend visits (group 2)	-0.124435	-0.229093	-0.0197775	0.0197949	0.569773
Connectivity between ECN and lateral VN2	Sports club/gym attendance (group 1)	0.0885944	0.0140274	0.163161	0.0198835	0.569773
Connectivity between medial VN and ECN	Adult educational classes (group 2)	-0.114581	-0.211159	-0.0180024	0.0200624	0.569773
Connectivity between anterior DMN2 and ECN	Sports club/gym attendance (group 3)	-0.0637242	-0.117528	-0.00992073	0.0202743	0.569773
Connectivity between posterior DMN2 and right CON	Family and friend visits (group 3)	0.0945056	0.0144158	0.174595	0.0207431	0.569773
Connectivity between anterior DMN2 and right CON	Family and friend visits (group 1)	-0.127815	-0.236269	-0.0193599	0.0209042	0.569773
Connectivity between posterior DMN2 and AN2	Family and friend visits (group 2)	-0.121827	-0.225261	-0.0183929	0.0209786	0.569773
Connectivity between AN2 and right CON	Adult educational classes (group 3)	0.132784	0.0200384	0.245531	0.0209887	0.569773
Connectivity between anterior DMN and medial VN	Family and friend visits (group 1)	0.129124	0.0194858	0.238761	0.0209888	0.569773
Connectivity between right FPN and left FPN	Religious activities (group 1)	-0.177397	-0.328351	-0.0264427	0.0212691	0.569773
Connectivity between SMN3 and right CON	Sports club/gym attendance (group 1)	0.0876404	0.0130611	0.16222	0.0212734	0.569773
Connectivity between right FPN and SMN2	Pubs/social clubs (group 3)	0.0708058	0.0105385	0.131073	0.021303	0.569773
Connectivity between SMN and anterior DMN2	Pubs/social clubs (group 3)	0.0705295	0.0104782	0.130581	0.0213446	0.569773
Connectivity between anterior DMN and right FPN	Religious activities (group 3)	0.068794	0.0101947	0.127393	0.0214013	0.569773
Volume of amygdala	Religious activities (group 3)	-0.0644531	-0.118783	-0.010123	0.0200707	0.569773
Volume of amygdala	Sports club/gym attendance (group 3)	0.0593058	0.00931073	0.109301	0.0200802	0.569773
Volume of GM in angular gyrus	Adult educational classes (group 1)	-0.0901755	-0.166591	-0.0137596	0.020736	0.569773
Volume of GM in inferior temporal gyrus anterior division	Sports club/gym attendance (group 2)	-0.0802376	-0.148176	-0.0122992	0.0206314	0.569773
Volume of GM in insular cortex	Leisure-time computer use (group 2)	0.134336	0.0203385	0.248333	0.0209145	0.569773
Volume of GM in intracalcarine cortex	Pubs/social clubs (group 2)	0.0907457	0.0148895	0.166602	0.0190505	0.569773
Volume of GM in superior temporal gyrus anterior division	Religious activities (group 2)	-0.135739	-0.251149	-0.0203291	0.0211618	0.569773
Volume of thalamus	Leisure-time computer use (group 3)	0.117096	0.0188148	0.215376	0.019541	0.569773
Weighted mean MD in tract forceps major	Family and friend visits (group 1)	-0.129888	-0.239495	-0.020281	0.0202062	0.569773
Connectivity between SMN2 and ECN	Religious activities (group 3)	-0.0680074	-0.126114	-0.00990076	0.0218016	0.575222
Weighted mean FA in tract forceps major	Pubs/social clubs (group 2)	0.098402	0.0143223	0.182482	0.021807	0.575222
Connectivity between medial VN2 and right CON	Sports club/gym attendance (group 2)	0.0893609	0.0128182	0.165904	0.022133	0.580392
Connectivity between lateral VN and lateral VN2	Adult educational classes (group 1)	-0.0995795	-0.184931	-0.0142282	0.0222202	0.580392
Connectivity between AN2 and right CON	Family and friend visits (group 1)	-0.127939	-0.23774	-0.0181378	0.0223941	0.580392
Volume of GM in inferior temporal gyrus anterior division	Leisure-time computer use (group 3)	0.147527	0.0207105	0.274344	0.0226114	0.580392
Volume of GM in intracalcarine cortex	Family and friend visits (group 1)	0.115248	0.0161923	0.214304	0.0225933	0.580392
Weighted mean MD in tract posterior thalamic radiation	Sports club/gym attendance (group 1)	0.0790433	0.0111464	0.14694	0.022512	0.580392
Connectivity between SMN2 and AN	Religious activities (group 3)	0.0678358	0.00937964	0.126292	0.0229452	0.584749
Connectivity between left FPN and precuneus/ PCC DMN	Family and friend visits (group 1)	-0.126919	-0.236321	-0.0175169	0.0229854	0.584749
Connectivity between SMN and posterior DMN2	Adult educational classes (group 1)	-0.099942	-0.186289	-0.0135951	0.0233017	0.585221
Connectivity between lateral VN2 and precuneus/ PCC DMN	Leisure-time computer use (group 3)	0.1648	0.0224085	0.307191	0.0233107	0.585221
Volume of GM in crus ii cerebellum	Religious activities (group 2)	0.141471	0.0194149	0.263526	0.0231093	0.585221
Connectivity between CN and ECN	Religious activities (group 1)	-0.1731	-0.322985	-0.0232146	0.0236094	0.590132
Connectivity between lateral VN and AN2	Pubs/social clubs (group 3)	0.0682394	0.00906716	0.127412	0.0238091	0.592537
Connectivity between SMN and posterior DMN2	Sports club/gym attendance (group 2)	0.0880608	0.0115181	0.164604	0.0241459	0.595788
Connectivity between medial VN2 and BGN	Family and friend visits (group 1)	-0.126486	-0.236429	-0.0165424	0.0241479	0.595788
Weighted mean MD in tract anterior thalamic radiation	Sports club/gym attendance (group 1)	0.0747521	0.00972572	0.139778	0.0242585	0.595948
Connectivity between CN and precuneus/ PCC DMN	Pubs/social clubs (group 2)	0.0941523	0.0119616	0.176343	0.0247609	0.597431
Connectivity between posterior DMN2 and CN	Sports club/gym attendance (group 2)	-0.0859266	-0.160942	-0.010911	0.0247717	0.597431
Volume of GM in cingulate gyrus posterior division	Religious activities (group 2)	0.110526	0.0139884	0.207064	0.0248408	0.597431
Volume of GM in occipital pole	Family and friend visits (group 2)	0.0994491	0.0128224	0.186076	0.0244502	0.597431
Weighted mean FA in tract superior thalamic radiation	Leisure-time computer use (group 3)	-0.159083	-0.297819	-0.0203469	0.0246199	0.597431
Connectivity between SMN2 and anterior DMN2	Family and friend visits (group 3)	0.0912801	0.0113537	0.171206	0.0252023	0.601075
Volume of GM in temporal fusiform cortex posterior division	Sports club/gym attendance (group 2)	-0.068628	-0.128687	-0.0085691	0.0251224	0.601075
Connectivity between left FPN and CN	Adult educational classes (group 2)	-0.110334	-0.207141	-0.013527	0.0255	0.605651
Weighted mean MD in tract uncinate fasciculus	Religious activities (group 3)	-0.0628222	-0.117996	-0.00764864	0.0256426	0.606522
Connectivity between left FPN and right CON	Adult educational classes (group 2)	0.109124	0.0126328	0.205616	0.0266585	0.609865
Connectivity between anterior DMN and medial VN2	Pubs/social clubs (group 2)	0.0952231	0.0109774	0.179469	0.0267417	0.609865
Connectivity between posterior DMN and precuneus/ PCC DMN	Pubs/social clubs (group 3)	-0.0676345	-0.127501	-0.00776831	0.0268144	0.609865
Connectivity between left FPN and medial VN2	Religious activities (group 1)	0.170951	0.0195535	0.322349	0.0268964	0.609865
Connectivity between medial VN and BGN	Religious activities (group 3)	0.0661685	0.00749597	0.124841	0.0270853	0.609865
Connectivity between anterior DMN and SMN	Religious activities (group 2)	0.151392	0.0170548	0.28573	0.0271948	0.609865
Connectivity between left CON and precuneus/ PCC DMN	Adult educational classes (group 1)	0.096735	0.0108815	0.182589	0.0272234	0.609865
Connectivity between CN and precuneus/ PCC DMN	Religious activities (group 2)	-0.148453	-0.280229	-0.0166776	0.0272486	0.609865
Connectivity between medial VN and left FPN	Sports club/gym attendance (group 2)	-0.0858264	-0.162105	-0.00954837	0.027438	0.609865
Connectivity between medial VN and left CON	Adult educational classes (group 1)	-0.0974411	-0.18405	-0.0108325	0.0274522	0.609865
Connectivity between anterior DMN2 and BGN	Family and friend visits (group 1)	0.123246	0.0136977	0.232795	0.0274574	0.609865
Volume of caudate	Leisure-time computer use (group 3)	0.132482	0.0150302	0.249934	0.0270568	0.609865
Volume of GM in frontal orbital cortex	Adult educational classes (group 2)	-0.082279	-0.154876	-0.00968213	0.0263323	0.609865
Volume of GM in heschls gyrus includes h1 and h2	Family and friend visits (group 1)	0.100484	0.01204	0.188928	0.0259681	0.609865
Volume of GM in insular cortex	Sports club/gym attendance (group 3)	0.0435188	0.00505179	0.0819859	0.0266041	0.609865
Volume of hippocampus	Leisure-time computer use (group 2)	0.159383	0.0176853	0.301081	0.0274887	0.609865
Connectivity between posterior DMN2 and precuneus/ PCC DMN	Family and friend visits (group 1)	-0.121289	-0.229375	-0.0132031	0.0278563	0.610608
Connectivity between lateral VN and posterior DMN2	Leisure-time computer use (group 2)	0.177346	0.0193038	0.335389	0.0278578	0.610608
Volume of GM in frontal orbital cortex	Family and friend visits (group 1)	0.0918913	0.0099545	0.173828	0.0279489	0.610608
Volume of GM in heschls gyrus includes h1 and h2	Family and friend visits (group 2)	0.0947363	0.0104349	0.179038	0.0276306	0.610608
Connectivity between SMN2 and CN	Adult educational classes (group 3)	0.124485	0.0132334	0.235737	0.0283054	0.616047
Connectivity between right FPN and right CON	Pubs/social clubs (group 3)	-0.0673263	-0.127581	-0.00707208	0.0285291	0.616588
Connectivity between right FPN and medial VN2	Sports club/gym attendance (group 1)	0.0842698	0.00875655	0.159783	0.0287301	0.616588
Connectivity between anterior DMN and left FPN	Pubs/social clubs (group 1)	0.093045	0.00961675	0.176473	0.028829	0.616588
Connectivity between anterior DMN and BGN	Pubs/social clubs (group 2)	-0.0934431	-0.177263	-0.00962292	0.0288958	0.616588
Connectivity between posterior DMN and lateral VN2	Adult educational classes (group 3)	-0.125722	-0.238518	-0.012927	0.0289244	0.616588
Connectivity between SMN and CN	Family and friend visits (group 1)	0.121883	0.0124966	0.231269	0.0289766	0.616588
Connectivity between SMN2 and right CON	Sports club/gym attendance (group 3)	0.0599121	0.00603602	0.113788	0.0292961	0.621077
Connectivity between ECN and precuneus/ PCC DMN	Sports club/gym attendance (group 1)	-0.0829127	-0.157622	-0.00820317	0.0296225	0.621715
Connectivity between SMN3 and precuneus/ PCC DMN	Sports club/gym attendance (group 3)	0.0597328	0.00581747	0.113648	0.0299026	0.621715
Volume of GM in crus ii cerebellum	Religious activities (group 3)	-0.0591312	-0.112356	-0.00590659	0.0294506	0.621715
Volume of GM in lateral occipital cortex inferior division	Adult educational classes (group 3)	0.101364	0.00989687	0.192831	0.0298581	0.621715
Volume of GM in occipital fusiform gyrus	Religious activities (group 2)	0.124576	0.0120811	0.237071	0.0299779	0.621715
Weighted mean FA in tract medial lemniscus	Family and friend visits (group 1)	-0.117277	-0.223016	-0.0115383	0.0297225	0.621715
Connectivity between SMN3 and precuneus/ PCC DMN	Adult educational classes (group 2)	0.107194	0.0102327	0.204156	0.0302546	0.623978
Connectivity between left FPN and ECN	Leisure-time computer use (group 1)	-0.222983	-0.424892	-0.0210736	0.0304287	0.623978
Connectivity between AN and BGN	Family and friend visits (group 1)	-0.120694	-0.230127	-0.0112603	0.030651	0.623978
Connectivity between lateral VN and AN	Religious activities (group 3)	-0.064889	-0.123727	-0.00605089	0.0306596	0.623978
Connectivity between anterior DMN and BGN	Adult educational classes (group 1)	0.0948086	0.00883644	0.180781	0.0306682	0.623978
Connectivity between SMN3 and BGN	Religious activities (group 2)	-0.146316	-0.279053	-0.0135792	0.0307411	0.623978
Connectivity between medial VN2 and BGN	Family and friend visits (group 3)	-0.0880116	-0.168159	-0.00786448	0.0313795	0.629985
Connectivity between left FPN and AN	Adult educational classes (group 2)	0.106791	0.00945886	0.204124	0.0315255	0.629985
Connectivity between anterior DMN and lateral VN	Adult educational classes (group 1)	-0.0946848	-0.181036	-0.00833369	0.0316296	0.629985
Connectivity between right FPN and medial VN2	Pubs/social clubs (group 2)	0.092274	0.00806568	0.176482	0.0317427	0.629985
Connectivity between medial VN and right FPN	Family and friend visits (group 3)	-0.0878566	-0.168041	-0.00767241	0.0317579	0.629985
Volume of GM in inferior temporal gyrus temporooccipital part	Adult educational classes (group 3)	0.104763	0.00912108	0.200405	0.0318074	0.629985
Volume of GM in middle temporal gyrus anterior division	Religious activities (group 3)	0.0549625	0.0048469	0.105078	0.0315978	0.629985
Connectivity between SMN2 and precuneus/ PCC DMN	Adult educational classes (group 1)	0.0941646	0.00801222	0.180317	0.0321785	0.633344
Connectivity between right FPN and AN2	Religious activities (group 3)	-0.0638942	-0.122461	-0.00532759	0.0325005	0.633344
Connectivity between right FPN and SMN3	Leisure-time computer use (group 3)	-0.155306	-0.297858	-0.0127545	0.0327387	0.633344
Connectivity between posterior DMN and ECN	Sports club/gym attendance (group 2)	-0.0828845	-0.159194	-0.0065754	0.0332709	0.633344
Connectivity between ECN and AN2	Sports club/gym attendance (group 3)	-0.0586071	-0.112649	-0.00456492	0.0335473	0.633344
Connectivity between SMN3 and lateral VN2	Sports club/gym attendance (group 1)	0.0810926	0.00630031	0.155885	0.0335853	0.633344
Connectivity between SMN and right CON	Religious activities (group 3)	0.0634409	0.00482195	0.12206	0.03391	0.633344
Connectivity between right FPN and left CON	Pubs/social clubs (group 3)	0.064375	0.00481804	0.123932	0.034135	0.633344
Connectivity between lateral VN and lateral VN2	Family and friend visits (group 2)	-0.111898	-0.215458	-0.00833905	0.034197	0.633344
Connectivity between lateral VN and posterior DMN	Pubs/social clubs (group 1)	-0.0894623	-0.172313	-0.00661162	0.0343172	0.633344
Connectivity between medial VN and left FPN	Adult educational classes (group 2)	-0.104711	-0.201733	-0.00768776	0.0344114	0.633344
Connectivity between ECN and BGN	Religious activities (group 1)	0.16312	0.0119004	0.314339	0.0345017	0.633344
Connectivity between SMN and posterior DMN	Leisure-time computer use (group 3)	-0.154244	-0.297267	-0.0112212	0.0345417	0.633344
Connectivity between left CON and AN2	Family and friend visits (group 2)	0.111986	0.00804365	0.215928	0.0347215	0.633344
Connectivity between right FPN and right CON	Sports club/gym attendance (group 2)	-0.0821841	-0.158574	-0.00579464	0.0349795	0.633344
Connectivity between lateral VN and AN	Pubs/social clubs (group 3)	0.0649436	0.00457482	0.125312	0.0349923	0.633344
Connectivity between lateral VN2 and precuneus/ PCC DMN	Family and friend visits (group 2)	-0.112082	-0.216475	-0.00768829	0.0353552	0.633344
Volume of GM in cingulate gyrus anterior division	Adult educational classes (group 3)	0.106951	0.00827258	0.20563	0.0336514	0.633344
Volume of GM in frontal operculum cortex	Adult educational classes (group 1)	0.0805424	0.00639249	0.154692	0.0332641	0.633344
Volume of GM in ix cerebellum	Pubs/social clubs (group 2)	0.0850755	0.0059219	0.164229	0.0351562	0.633344
Volume of GM in juxtapositional lobule cortex formerly supplementary motor cortex	Adult educational classes (group 1)	0.0846118	0.00681363	0.16241	0.0330425	0.633344
Volume of GM in temporal occipital fusiform cortex	Pubs/social clubs (group 2)	0.0744699	0.00550349	0.143436	0.0343175	0.633344
Volume of GM in ventral striatum	Leisure-time computer use (group 3)	0.130656	0.010692	0.25062	0.0327941	0.633344
Volume of GM in vermis viiia cerebellum	Religious activities (group 3)	-0.059859	-0.115033	-0.00468507	0.0334747	0.633344
Volume of GM in viiia cerebellum	Religious activities (group 2)	0.128768	0.0088509	0.248685	0.0353277	0.633344
Weighted mean FA in tract forceps major	Family and friend visits (group 1)	0.118543	0.00878317	0.228303	0.0342806	0.633344
Weighted mean MD in tract middle cerebellar peduncle	Family and friend visits (group 3)	-0.0843194	-0.161938	-0.006701	0.0332442	0.633344
Weighted mean MD in tract posterior thalamic radiation	Family and friend visits (group 2)	-0.101409	-0.195646	-0.00717257	0.0349363	0.633344
Weighted mean MD in tract superior longitudinal fasciculus	Religious activities (group 2)	0.135105	0.00923201	0.260979	0.0354071	0.633344
Weighted mean MD in tract superior thalamic radiation	Family and friend visits (group 3)	-0.0796528	-0.153642	-0.00566382	0.0348624	0.633344
Weighted mean MD in tract superior thalamic radiation	Religious activities (group 2)	0.133968	0.00934374	0.258592	0.0351289	0.633344
Volume of GM in superior temporal gyrus anterior division	Religious activities (group 3)	0.0539589	0.00363228	0.104286	0.0356076	0.634947
Connectivity between AN and BGN	Sports club/gym attendance (group 3)	-0.057577	-0.111519	-0.00363552	0.0364366	0.642527
Connectivity between SMN and posterior DMN2	Leisure-time computer use (group 1)	-0.216514	-0.419406	-0.0136222	0.0364817	0.642527
Global WMH volume	Family and friend visits (group 3)	-0.0719625	-0.139363	-0.00456156	0.0363875	0.642527
Volume of GM in vermis ix cerebellum	Family and friend visits (group 3)	-0.0813614	-0.157547	-0.00517597	0.0363418	0.642527
Connectivity between anterior DMN2 and AN2	Sports club/gym attendance (group 3)	0.0569193	0.00349289	0.110346	0.0367921	0.646006
Connectivity between SMN2 and CN	Religious activities (group 2)	0.141336	0.0082629	0.274409	0.0373765	0.653643
Connectivity between anterior DMN and CN	Adult educational classes (group 3)	-0.117632	-0.228447	-0.00681585	0.0374817	0.653643
Connectivity between left FPN and SMN2	Sports club/gym attendance (group 1)	0.0798577	0.00458367	0.155132	0.0375919	0.653643
Connectivity between left CON and AN2	Religious activities (group 3)	-0.061852	-0.120251	-0.00345257	0.0379122	0.653643
Volume of GM in occipital pole	Leisure-time computer use (group 2)	0.140894	0.00798974	0.273798	0.0377319	0.653643
Weighted mean FA in tract corticospinal tract	Adult educational classes (group 2)	-0.0981347	-0.190779	-0.00549051	0.037886	0.653643
Connectivity between AN2 and right CON	Leisure-time computer use (group 1)	0.21443	0.0116593	0.417201	0.0382068	0.653951
Connectivity between left CON and ECN	Leisure-time computer use (group 3)	-0.150881	-0.293652	-0.0081106	0.0383332	0.653951
Connectivity between medial VN and right CON	Family and friend visits (group 3)	-0.0847622	-0.164994	-0.00453062	0.0383953	0.653951
Connectivity between left FPN and SMN3	Family and friend visits (group 2)	-0.109998	-0.214199	-0.00579823	0.0385466	0.653951
Connectivity between lateral VN and right FPN	Adult educational classes (group 2)	0.102422	0.00536438	0.199479	0.0386156	0.653951
Weighted mean MD in tract acoustic radiation	Leisure-time computer use (group 2)	0.167601	0.00890831	0.326293	0.0384565	0.653951
Connectivity between anterior DMN and lateral VN	Family and friend visits (group 1)	-0.115791	-0.225673	-0.00590881	0.0388919	0.656106
Connectivity between medial VN2 and SMN2	Sports club/gym attendance (group 3)	0.0567508	0.00285389	0.110648	0.0390447	0.656106
Connectivity between posterior DMN and AN2	Adult educational classes (group 2)	-0.102096	-0.199235	-0.00495642	0.0394043	0.656106
Connectivity between right FPN and SMN2	Adult educational classes (group 1)	0.0903712	0.00415549	0.176587	0.0399366	0.656106
Connectivity between posterior DMN and BGN	Religious activities (group 2)	-0.141473	-0.276597	-0.00634947	0.0401662	0.656106
Connectivity between AN and BGN	Religious activities (group 1)	-0.157509	-0.308062	-0.00695709	0.0403148	0.656106
Connectivity between SMN2 and CN	Sports club/gym attendance (group 1)	0.0778167	0.00339407	0.152239	0.0404305	0.656106
Connectivity between left CON and right CON	Religious activities (group 3)	-0.0612861	-0.119904	-0.00266814	0.0404474	0.656106
Connectivity between lateral VN and medial VN	Family and friend visits (group 2)	0.108844	0.0046458	0.213042	0.0406261	0.656106
Connectivity between posterior DMN and posterior DMN2	Religious activities (group 2)	-0.140164	-0.274355	-0.00597274	0.0406409	0.656106
Volume of GM in central opercular cortex	Adult educational classes (group 2)	-0.0766146	-0.149956	-0.00327297	0.0406184	0.656106
Volume of GM in iiv cerebellum	Pubs/social clubs (group 3)	-0.0578092	-0.112871	-0.00274763	0.0396151	0.656106
Volume of GM in inferior temporal gyrus anterior division	Adult educational classes (group 2)	-0.0903209	-0.176762	-0.00387981	0.0405689	0.656106
Volume of GM in planum polare	Sports club/gym attendance (group 2)	-0.0628901	-0.123148	-0.00263213	0.0408004	0.656106
Volume of GM in superior frontal gyrus	Adult educational classes (group 2)	-0.0841116	-0.164767	-0.00345653	0.0409599	0.656106
Volume of putamen	Leisure-time computer use (group 2)	0.127687	0.00574246	0.249632	0.040147	0.656106
Weighted mean FA in tract forceps minor	Adult educational classes (group 2)	-0.0966895	-0.18944	-0.00393881	0.0410353	0.656106
Weighted mean FA in tract uncinate fasciculus	Adult educational classes (group 2)	-0.0972079	-0.189659	-0.00475685	0.039324	0.656106
Weighted mean MD in tract parahippocampal part of cingulum	Family and friend visits (group 1)	-0.112577	-0.219616	-0.00553745	0.0392717	0.656106
Weighted mean MD in tract superior longitudinal fasciculus	Family and friend visits (group 2)	-0.101883	-0.199612	-0.00415369	0.0410284	0.656106
Connectivity between SMN3 and precuneus/ PCC DMN	Pubs/social clubs (group 1)	0.0862405	0.00322631	0.169255	0.0417388	0.658559
Connectivity between medial VN2 and posterior DMN2	Sports club/gym attendance (group 3)	0.0562137	0.00207755	0.11035	0.0418349	0.658559
Connectivity between posterior DMN and right CON	Pubs/social clubs (group 2)	-0.0874508	-0.171714	-0.00318715	0.041944	0.658559
Connectivity between medial VN2 and SMN3	Sports club/gym attendance (group 3)	0.0560892	0.00203655	0.110142	0.0419729	0.658559
Connectivity between lateral VN and SMN2	Adult educational classes (group 3)	-0.116552	-0.228883	-0.0042203	0.0419941	0.658559
Volume of GM in ix cerebellum	Religious activities (group 2)	0.132149	0.00519473	0.259103	0.0413365	0.658559
Volume of GM in vermis ix cerebellum	Family and friend visits (group 1)	-0.108556	-0.213065	-0.00404726	0.0417659	0.658559
Connectivity between posterior DMN2 and ECN	Pubs/social clubs (group 1)	-0.0863954	-0.169736	-0.00305511	0.0421747	0.659584
Connectivity between posterior DMN and ECN	Family and friend visits (group 1)	0.113367	0.00378039	0.222954	0.0426054	0.659763
Connectivity between AN and precuneus/ PCC DMN	Family and friend visits (group 2)	-0.108055	-0.212623	-0.00348802	0.0428342	0.659763
Connectivity between SMN and CN	Adult educational classes (group 3)	-0.115634	-0.227937	-0.00333157	0.0435817	0.659763
Connectivity between medial VN2 and posterior DMN2	Sports club/gym attendance (group 2)	0.0787291	0.00221953	0.155239	0.0437157	0.659763
Connectivity between SMN2 and BGN	Adult educational classes (group 1)	0.0876144	0.00245481	0.172774	0.0437533	0.659763
Connectivity between posterior DMN and medial VN2	Sports club/gym attendance (group 3)	-0.055425	-0.109335	-0.00151533	0.0439004	0.659763
Connectivity between anterior DMN2 and CN	Religious activities (group 2)	-0.137432	-0.271159	-0.00370484	0.0439834	0.659763
Connectivity between left CON and ECN	Adult educational classes (group 2)	-0.0998809	-0.197153	-0.0026088	0.0441657	0.659763
Connectivity between CN and ECN	Family and friend visits (group 2)	0.106565	0.00272804	0.210402	0.0442787	0.659763
Connectivity between SMN and ECN	Pubs/social clubs (group 3)	-0.0615826	-0.121589	-0.00157627	0.0442796	0.659763
Connectivity between posterior DMN and AN2	Family and friend visits (group 3)	-0.0820134	-0.16194	-0.00208661	0.0443131	0.659763
Connectivity between posterior DMN and CN	Leisure-time computer use (group 1)	-0.207729	-0.410342	-0.00511524	0.0444913	0.659763
Volume of GM in brainstem	Adult educational classes (group 3)	-0.104271	-0.205391	-0.0031515	0.0432766	0.659763
Volume of GM in inferior frontal gyrus pars triangularis	Leisure-time computer use (group 1)	0.190814	0.00541427	0.376213	0.0436762	0.659763
Volume of GM in parietal operculum cortex	Family and friend visits (group 1)	0.0921115	0.00230955	0.181913	0.0443934	0.659763
Volume of GM in temporal fusiform cortex posterior division	Leisure-time computer use (group 3)	0.115869	0.0037376	0.228001	0.0428391	0.659763
Weighted mean FA in tract middle cerebellar peduncle	Religious activities (group 3)	-0.0591221	-0.116431	-0.00181295	0.0431816	0.659763
Weighted mean MD in tract acoustic radiation	Family and friend visits (group 1)	-0.112129	-0.220775	-0.00348202	0.0430978	0.659763
Weighted mean MD in tract anterior thalamic radiation	Family and friend visits (group 2)	-0.0931971	-0.18344	-0.00295376	0.0429601	0.659763
Weighted mean MD in tract parahippocampal part of cingulum	Family and friend visits (group 3)	-0.0803955	-0.158426	-0.00236526	0.04345	0.659763
Connectivity between SMN and precuneus/ PCC DMN	Pubs/social clubs (group 3)	0.0618407	0.00142119	0.12226	0.0448505	0.660718
Connectivity between anterior DMN and posterior DMN2	Leisure-time computer use (group 1)	-0.205764	-0.406883	-0.0046446	0.0449401	0.660718
Connectivity between SMN3 and lateral VN2	Religious activities (group 3)	0.0596964	0.00132644	0.118066	0.0450175	0.660718
Weighted mean FA in tract anterior thalamic radiation	Religious activities (group 2)	-0.131421	-0.259773	-0.00306874	0.0447698	0.660718
Connectivity between left FPN and anterior DMN2	Adult educational classes (group 2)	0.0992115	0.0020951	0.196328	0.0452595	0.662571
Connectivity between medial VN2 and ECN	Pubs/social clubs (group 3)	0.0615297	0.00126348	0.121796	0.0453877	0.662754
Connectivity between posterior DMN2 and lateral VN2	Leisure-time computer use (group 3)	0.144871	0.00256037	0.287181	0.0460192	0.668798
Connectivity between SMN and right CON	Sports club/gym attendance (group 2)	-0.0775877	-0.15381	-0.00136558	0.0460354	0.668798
Connectivity between lateral VN and anterior DMN2	Pubs/social clubs (group 1)	0.0845488	0.00119773	0.1679	0.0467984	0.67255
Connectivity between anterior DMN2 and BGN	Family and friend visits (group 3)	0.0809027	0.00104313	0.160762	0.0470824	0.67255
Connectivity between anterior DMN and BGN	Religious activities (group 1)	-0.152272	-0.302672	-0.00187247	0.0472159	0.67255
Connectivity between SMN2 and ECN	Pubs/social clubs (group 1)	0.0833867	0.00101878	0.165755	0.0472336	0.67255
Volume of GM in crus ii cerebellum	Pubs/social clubs (group 3)	-0.0553776	-0.109988	-0.000767743	0.0468658	0.67255
Volume of GM in middle frontal gyrus	Pubs/social clubs (group 3)	-0.0497762	-0.0987922	-0.000760239	0.0465519	0.67255
Weighted mean MD in tract forceps minor	Family and friend visits (group 2)	-0.102549	-0.203794	-0.00130491	0.0471202	0.67255
Weighted mean MD in tract middle cerebellar peduncle	Leisure-time computer use (group 2)	-0.157971	-0.313505	-0.00243759	0.0465169	0.67255
Volume of GM in precentral gyrus	Pubs/social clubs (group 1)	-0.0662425	-0.131726	-0.000758712	0.0474047	0.673311
Connectivity between AN2 and precuneus/ PCC DMN	Adult educational classes (group 1)	-0.0871682	-0.173389	-0.000947277	0.0475362	0.673508
Connectivity between lateral VN and posterior DMN2	Adult educational classes (group 1)	-0.0857316	-0.170709	-0.000753994	0.0480021	0.677073
Connectivity between SMN2 and ECN	Sports club/gym attendance (group 1)	0.0752252	0.000626866	0.149824	0.0481062	0.677073
Connectivity between right FPN and ECN	Sports club/gym attendance (group 2)	0.0772547	0.000621282	0.153888	0.0481718	0.677073
Connectivity between medial VN and BGN	Sports club/gym attendance (group 3)	-0.0543979	-0.108416	-0.00037975	0.0484114	0.677073
Volume of GM in angular gyrus	Family and friend visits (group 2)	0.0933295	0.000616002	0.186043	0.0484975	0.677073
Volume of GM in frontal operculum cortex	Sports club/gym attendance (group 1)	0.0652886	0.000450672	0.130127	0.0484291	0.677073
Connectivity between SMN3 and BGN	Sports club/gym attendance (group 1)	-0.0745935	-0.148811	-0.000375803	0.0488515	0.680355
Connectivity between left CON and BGN	Sports club/gym attendance (group 1)	0.0757886	0.000310811	0.151266	0.0490643	0.681388
Global WMH volume	Family and friend visits (group 2)	-0.0884517	-0.176579	-0.000324039	0.0491638	0.681388
Volume of caudate	Pubs/social clubs (group 1)	0.0686447	0.000118055	0.137171	0.0496067	0.685867
Connectivity between AN2 and lateral VN2	Family and friend visits (group 3)	0.079949	1.66909e-05	0.159881	0.0499522	0.688524
Connectivity between anterior DMN and posterior DMN	Sports club/gym attendance (group 2)	-0.0760704	-0.152176	3.50428e-05	0.0501056	0.688524
Weighted mean MD in tract inferior frontooccipital fasciculus	Leisure-time computer use (group 3)	0.132137	-9.21009e-05	0.264367	0.0501597	0.688524
Volume of GM in lateral occipital cortex superior division	Adult educational classes (group 3)	0.0881612	-0.000197012	0.176519	0.0505129	0.691583
Volume of GM in occipital fusiform gyrus	Adult educational classes (group 3)	0.093879	-0.000255224	0.188013	0.0506242	0.691583
Volume of GM in frontal pole	Pubs/social clubs (group 1)	-0.0555644	-0.111362	0.00023269	0.0509628	0.694551
Connectivity between medial VN and SMN2	Adult educational classes (group 2)	-0.0969644	-0.19441	0.000481036	0.0511414	0.695329
Volume of GM in superior temporal gyrus anterior division	Adult educational classes (group 1)	0.0734466	-0.000413088	0.147306	0.0512948	0.695762
Connectivity between lateral VN and lateral VN2	Pubs/social clubs (group 1)	-0.0818922	-0.164295	0.000510576	0.0514361	0.696029
Connectivity between posterior DMN and SMN2	Sports club/gym attendance (group 1)	0.0744881	-0.000748267	0.149724	0.0523218	0.696263
Connectivity between medial VN2 and SMN2	Leisure-time computer use (group 1)	-0.199811	-0.40178	0.00215846	0.0524985	0.696263
Connectivity between left FPN and AN	Leisure-time computer use (group 2)	-0.158712	-0.319206	0.0017816	0.0525973	0.696263
Connectivity between lateral VN and medial VN	Leisure-time computer use (group 3)	-0.140547	-0.282694	0.00159936	0.0526333	0.696263
Connectivity between medial VN and ECN	Religious activities (group 2)	0.132415	-0.00152747	0.266358	0.0526698	0.696263
Volume of GM in frontal medial cortex	Pubs/social clubs (group 1)	-0.0745424	-0.149907	0.000821738	0.0525502	0.696263
Volume of GM in inferior temporal gyrus temporooccipital part	Religious activities (group 3)	-0.0493856	-0.0992783	0.000507162	0.0523741	0.696263
Volume of GM in lingual gyrus	Adult educational classes (group 1)	0.0617396	-0.000672623	0.124152	0.05252	0.696263
Volume of GM in superior frontal gyrus	Leisure-time computer use (group 3)	0.117194	-0.0011784	0.235566	0.0523241	0.696263
Volume of GM in vi cerebellum	Religious activities (group 2)	0.113628	-0.000919394	0.228175	0.0518669	0.696263
Connectivity between BGN and lateral VN2	Religious activities (group 2)	0.133047	-0.00192344	0.268018	0.0533545	0.700052
Connectivity between lateral VN and AN2	Adult educational classes (group 3)	-0.108837	-0.219464	0.00178929	0.0538214	0.700052
Connectivity between AN and lateral VN2	Leisure-time computer use (group 3)	-0.140346	-0.283091	0.0023991	0.0539757	0.700052
Connectivity between CN and right CON	Religious activities (group 2)	0.13201	-0.00234343	0.266363	0.054131	0.700052
Connectivity between lateral VN and lateral VN2	Family and friend visits (group 3)	-0.0778066	-0.15701	0.00139673	0.0541781	0.700052
Connectivity between medial VN2 and AN2	Sports club/gym attendance (group 3)	0.0530474	-0.000979398	0.107074	0.0542991	0.700052
Connectivity between ECN and lateral VN2	Sports club/gym attendance (group 3)	0.0523956	-0.00110191	0.105893	0.0549079	0.700052
Connectivity between left FPN and AN2	Religious activities (group 2)	0.131818	-0.00302824	0.266665	0.0553701	0.700052
Connectivity between lateral VN and right FPN	Sports club/gym attendance (group 2)	-0.0745825	-0.150884	0.00171885	0.0553876	0.700052
Connectivity between lateral VN and AN2	Pubs/social clubs (group 1)	0.0797973	-0.0019343	0.161529	0.0556725	0.700052
Connectivity between medial VN and SMN3	Leisure-time computer use (group 1)	0.197465	-0.00487334	0.399804	0.0557774	0.700052
Connectivity between SMN2 and precuneus/ PCC DMN	Leisure-time computer use (group 1)	-0.197589	-0.400087	0.00490955	0.0558176	0.700052
Connectivity between lateral VN and BGN	Family and friend visits (group 1)	0.107314	-0.00267978	0.217308	0.0558472	0.700052
Connectivity between anterior DMN and posterior DMN	Adult educational classes (group 3)	-0.109433	-0.22162	0.00275303	0.0558917	0.700052
Global WMH volume	Sports club/gym attendance (group 1)	0.0623356	-0.00116637	0.125838	0.0543579	0.700052
Volume of GM in central opercular cortex	Family and friend visits (group 1)	0.0813479	-0.00147196	0.164168	0.054212	0.700052
Volume of GM in heschls gyrus includes h1 and h2	Sports club/gym attendance (group 2)	-0.0602287	-0.121837	0.00137934	0.0553532	0.700052
Volume of GM in middle frontal gyrus	Leisure-time computer use (group 1)	0.161812	-0.0029854	0.32661	0.054296	0.700052
Volume of GM in superior temporal gyrus posterior division	Adult educational classes (group 1)	0.0697863	-0.00158592	0.141159	0.0553111	0.700052
Global WM volume	Religious activities (group 3)	-0.028731	-0.0581733	0.000711346	0.0557964	0.700052
Weighted mean FA in tract forceps major	Family and friend visits (group 3)	0.0782147	-0.00179891	0.158228	0.0553765	0.700052
Weighted mean FA in tract inferior frontooccipital fasciculus	Family and friend visits (group 3)	0.0762095	-0.00105838	0.153477	0.0532209	0.700052
Weighted mean FA in tract superior thalamic radiation	Adult educational classes (group 2)	-0.0928092	-0.187389	0.00177014	0.0544435	0.700052
Weighted mean MD in tract acoustic radiation	Pubs/social clubs (group 3)	0.0584692	-0.00120293	0.118141	0.0547994	0.700052
Connectivity between medial VN2 and AN	Leisure-time computer use (group 1)	-0.194977	-0.394961	0.00500812	0.0560182	0.700105
Connectivity between anterior DMN and posterior DMN2	Sports club/gym attendance (group 3)	-0.0522971	-0.105974	0.00138004	0.0561865	0.700679
Connectivity between medial VN and AN2	Pubs/social clubs (group 1)	-0.0809998	-0.164351	0.00235136	0.0568207	0.700703
Connectivity between anterior DMN and SMN3	Leisure-time computer use (group 2)	0.155068	-0.00470194	0.314838	0.0571322	0.700703
Connectivity between AN and precuneus/ PCC DMN	Leisure-time computer use (group 2)	0.154941	-0.00533573	0.315218	0.0581279	0.700703
Connectivity between SMN and right FPN	Family and friend visits (group 2)	0.101101	-0.00349402	0.205696	0.0581576	0.700703
Connectivity between posterior DMN2 and SMN3	Pubs/social clubs (group 2)	-0.0808622	-0.164527	0.00280226	0.0581807	0.700703
Connectivity between anterior DMN and posterior DMN	Family and friend visits (group 3)	-0.0769329	-0.156582	0.00271646	0.0583398	0.700703
Connectivity between medial VN and SMN2	Sports club/gym attendance (group 3)	0.0522558	-0.00194157	0.106453	0.058789	0.700703
Connectivity between AN and CN	Sports club/gym attendance (group 1)	0.0719535	-0.00267841	0.146585	0.0588058	0.700703
Connectivity between SMN2 and ECN	Family and friend visits (group 3)	0.0763321	-0.00285846	0.155523	0.0588603	0.700703
Volume of caudate	Sports club/gym attendance (group 2)	-0.0606157	-0.123517	0.00228532	0.0589223	0.700703
Global GM volume	Family and friend visits (group 1)	0.0519397	-0.00147768	0.105357	0.0566814	0.700703
Volume of GM in cingulate gyrus anterior division	Pubs/social clubs (group 2)	-0.0712807	-0.144904	0.00234269	0.0577469	0.700703
Volume of GM in inferior frontal gyrus pars opercularis	Adult educational classes (group 3)	0.0983185	-0.00345334	0.20009	0.0582947	0.700703
Volume of GM in insular cortex	Leisure-time computer use (group 1)	0.139049	-0.00501627	0.283115	0.0585261	0.700703
Volume of GM in vermis viiib cerebellum	Family and friend visits (group 2)	0.0959125	-0.00292372	0.194749	0.0571711	0.700703
Volume of GM in viib cerebellum	Pubs/social clubs (group 3)	-0.0526757	-0.107355	0.00200345	0.0590032	0.700703
Volume of GM in x cerebellum	Pubs/social clubs (group 3)	-0.0508853	-0.103649	0.0018781	0.0587289	0.700703
Volume of hippocampus	Adult educational classes (group 2)	-0.0828391	-0.168829	0.00315092	0.059004	0.700703
Volume of pallidum	Family and friend visits (group 3)	-0.0684074	-0.138964	0.00214968	0.0573984	0.700703
Weighted mean FA in tract corticospinal tract	Leisure-time computer use (group 3)	-0.131064	-0.267011	0.00488217	0.0588122	0.700703
Weighted mean FA in tract forceps minor	Religious activities (group 2)	-0.124015	-0.252562	0.00453202	0.0586402	0.700703
Weighted mean MD in tract anterior thalamic radiation	Adult educational classes (group 3)	0.0945998	-0.00258065	0.19178	0.0564003	0.700703
Weighted mean MD in tract inferior longitudinal fasciculus	Family and friend visits (group 2)	-0.0944578	-0.192387	0.0034719	0.0586918	0.700703
Connectivity between posterior DMN and precuneus/ PCC DMN	Adult educational classes (group 2)	-0.0929404	-0.189559	0.00367846	0.0593808	0.701239
Connectivity between medial VN and BGN	Leisure-time computer use (group 3)	-0.13703	-0.279572	0.00551213	0.0595391	0.701239
Volume of GM in frontal operculum cortex	Sports club/gym attendance (group 2)	0.0632212	-0.00252096	0.128963	0.0594533	0.701239
Volume of GM in vermis crus ii cerebellum	Sports club/gym attendance (group 1)	-0.0713601	-0.145557	0.00283693	0.059424	0.701239
Connectivity between SMN and medial VN2	Pubs/social clubs (group 1)	0.0798311	-0.00332452	0.162987	0.0598869	0.701931
Connectivity between medial VN and BGN	Pubs/social clubs (group 2)	0.0805359	-0.00343086	0.164503	0.0601216	0.701931
Connectivity between SMN and anterior DMN2	Family and friend visits (group 2)	0.0999082	-0.00436658	0.204183	0.0603935	0.701931
Connectivity between medial VN2 and ECN	Leisure-time computer use (group 1)	-0.194061	-0.396711	0.00858917	0.06053	0.701931
Connectivity between posterior DMN2 and precuneus/ PCC DMN	Family and friend visits (group 3)	-0.0754392	-0.154232	0.00335395	0.0605789	0.701931
Volume of GM in v cerebellum	Pubs/social clubs (group 2)	0.0713177	-0.00300562	0.145641	0.0600095	0.701931
Volume of thalamus	Leisure-time computer use (group 2)	0.105737	-0.00469901	0.216173	0.0605744	0.701931
Weighted mean MD in tract anterior thalamic radiation	Adult educational classes (group 2)	0.080431	-0.00344386	0.164306	0.060175	0.701931
Volume of GM in temporal fusiform cortex anterior division	Leisure-time computer use (group 3)	0.11186	-0.00504351	0.228764	0.0607339	0.702305
Connectivity between SMN3 and anterior DMN2	Adult educational classes (group 1)	-0.0821513	-0.168206	0.00390357	0.061334	0.703209
Connectivity between lateral VN2 and right CON	Pubs/social clubs (group 2)	0.0802558	-0.00383329	0.164345	0.0613951	0.703209
Connectivity between SMN2 and CN	Family and friend visits (group 1)	0.103332	-0.00504269	0.211706	0.0616521	0.703209
Connectivity between posterior DMN and anterior DMN2	Sports club/gym attendance (group 1)	-0.0720575	-0.147637	0.00352226	0.061672	0.703209
Volume of GM in precentral gyrus	Leisure-time computer use (group 1)	0.15231	-0.00704916	0.311669	0.0610286	0.703209
Weighted mean FA in tract medial lemniscus	Pubs/social clubs (group 3)	0.0553857	-0.00268182	0.113453	0.0615579	0.703209
Weighted mean MD in tract inferior longitudinal fasciculus	Adult educational classes (group 2)	0.0868423	-0.00420039	0.177885	0.0615448	0.703209
Connectivity between posterior DMN2 and SMN3	Sports club/gym attendance (group 1)	0.0714392	-0.00355086	0.146429	0.0618763	0.703281
Connectivity between left FPN and AN	Leisure-time computer use (group 1)	-0.193131	-0.395957	0.00969569	0.062	0.703281
Connectivity between SMN3 and BGN	Family and friend visits (group 1)	-0.102845	-0.210939	0.00524927	0.0622083	0.703281
Connectivity between SMN2 and anterior DMN2	Adult educational classes (group 1)	0.0817852	-0.00436073	0.167931	0.062776	0.703281
Connectivity between anterior DMN and CN	Leisure-time computer use (group 2)	-0.149642	-0.307349	0.00806493	0.0629197	0.703281
Connectivity between posterior DMN2 and precuneus/ PCC DMN	Religious activities (group 2)	-0.125866	-0.258599	0.00686724	0.0630858	0.703281
Connectivity between posterior DMN2 and SMN3	Leisure-time computer use (group 1)	0.191121	-0.0105833	0.392825	0.0632896	0.703281
Connectivity between right FPN and precuneus/ PCC DMN	Family and friend visits (group 1)	-0.103707	-0.213294	0.00587871	0.0636179	0.703281
Connectivity between medial VN and right CON	Family and friend visits (group 1)	-0.104149	-0.214208	0.00590991	0.0636327	0.703281
Connectivity between ECN and precuneus/ PCC DMN	Sports club/gym attendance (group 3)	-0.0506901	-0.10429	0.00290968	0.0637974	0.703281
Connectivity between AN and lateral VN2	Leisure-time computer use (group 2)	-0.151669	-0.312068	0.00873037	0.0638377	0.703281
Connectivity between medial VN2 and right CON	Religious activities (group 3)	-0.0556359	-0.114488	0.00321641	0.0639004	0.703281
Connectivity between SMN2 and AN2	Family and friend visits (group 2)	-0.098231	-0.202355	0.00589268	0.0644476	0.703281
Connectivity between left FPN and SMN3	Family and friend visits (group 3)	-0.0749362	-0.15463	0.00475716	0.0653296	0.703281
Connectivity between left CON and ECN	Leisure-time computer use (group 2)	-0.150632	-0.31106	0.00979614	0.0657223	0.703281
Connectivity between posterior DMN and AN2	Pubs/social clubs (group 3)	0.0564538	-0.00375379	0.116661	0.0660926	0.703281
Connectivity between SMN and posterior DMN2	Pubs/social clubs (group 2)	0.07888	-0.00524956	0.16301	0.0661074	0.703281
Connectivity between SMN3 and lateral VN2	Pubs/social clubs (group 3)	-0.0561101	-0.115981	0.00376079	0.0662277	0.703281
Connectivity between posterior DMN and precuneus/ PCC DMN	Family and friend visits (group 3)	-0.0744536	-0.153965	0.00505791	0.0664588	0.703281
Connectivity between anterior DMN and SMN3	Religious activities (group 3)	-0.0547226	-0.11328	0.00383485	0.0670051	0.703281
Connectivity between SMN2 and AN2	Family and friend visits (group 1)	-0.102041	-0.211282	0.00719941	0.0671266	0.703281
Connectivity between lateral VN and CN	Family and friend visits (group 3)	0.0741172	-0.00527479	0.153509	0.0672834	0.703281
Connectivity between right FPN and precuneus/ PCC DMN	Leisure-time computer use (group 2)	-0.149469	-0.309593	0.0106549	0.0673133	0.703281
Connectivity between left FPN and ECN	Family and friend visits (group 3)	-0.0743996	-0.154113	0.00531415	0.0673496	0.703281
Connectivity between medial VN2 and AN2	Sports club/gym attendance (group 1)	0.0702524	-0.00505237	0.145557	0.0674749	0.703281
Connectivity between anterior DMN and ECN	Adult educational classes (group 3)	-0.104209	-0.216027	0.0076084	0.0677547	0.703281
Connectivity between medial VN2 and ECN	Religious activities (group 1)	-0.140633	-0.291595	0.0103282	0.0678648	0.703281
Connectivity between SMN2 and AN2	Religious activities (group 2)	0.124918	-0.00920938	0.259046	0.0679372	0.703281
Connectivity between medial VN and SMN3	Adult educational classes (group 2)	0.0903586	-0.00673258	0.18745	0.0681388	0.703281
Connectivity between posterior DMN2 and BGN	Sports club/gym attendance (group 3)	-0.0497016	-0.103148	0.0037451	0.068355	0.703281
Connectivity between left FPN and AN	Family and friend visits (group 3)	0.0744267	-0.00561323	0.154467	0.0683724	0.703281
Connectivity between AN2 and precuneus/ PCC DMN	Adult educational classes (group 2)	-0.0904118	-0.187652	0.00682873	0.0684006	0.703281
Volume of caudate	Adult educational classes (group 1)	0.0662087	-0.004757	0.137174	0.0674573	0.703281
Global GM volume	Adult educational classes (group 3)	0.0510615	-0.00375781	0.105881	0.067904	0.703281
Volume of GM in brainstem	Pubs/social clubs (group 3)	-0.0504758	-0.104574	0.00362272	0.0674376	0.703281
Volume of GM in crus ii cerebellum	Family and friend visits (group 2)	0.0900379	-0.00473192	0.184808	0.0625853	0.703281
Volume of GM in frontal operculum cortex	Adult educational classes (group 2)	-0.0791257	-0.162752	0.00450106	0.0636678	0.703281
Volume of GM in frontal operculum cortex	Sports club/gym attendance (group 3)	0.0432912	-0.00322626	0.0898086	0.0681427	0.703281
Volume of GM in middle temporal gyrus temporooccipital part	Family and friend visits (group 2)	0.0859845	-0.00504072	0.17701	0.0641043	0.703281
Volume of GM in middle temporal gyrus temporooccipital part	Adult educational classes (group 3)	0.0925845	-0.00545792	0.190627	0.0641866	0.703281
Volume of GM in middle temporal gyrus temporooccipital part	Family and friend visits (group 1)	0.088975	-0.00652335	0.184473	0.067833	0.703281
Volume of GM in planum polare	Adult educational classes (group 1)	0.0636346	-0.00434482	0.131614	0.0665463	0.703281
Volume of GM in temporal fusiform cortex anterior division	Adult educational classes (group 2)	-0.0742201	-0.153914	0.0054736	0.0679436	0.703281
Volume of GM in vermis crus i cerebellum	Leisure-time computer use (group 2)	-0.15001	-0.310072	0.0100519	0.0662235	0.703281
Volume of GM in viiib cerebellum	Pubs/social clubs (group 3)	-0.050923	-0.105699	0.00385318	0.0684359	0.703281
Volume of hippocampus	Family and friend visits (group 2)	0.086584	-0.00594518	0.179113	0.0666446	0.703281
Volume of pallidum	Family and friend visits (group 1)	-0.0918415	-0.188629	0.00494635	0.0629103	0.703281
Volume of putamen	Religious activities (group 2)	-0.0963033	-0.198876	0.00626967	0.06574	0.703281
Volume of putamen	Sports club/gym attendance (group 3)	0.0382984	-0.00288853	0.0794853	0.068373	0.703281
Global WM volume	Leisure-time computer use (group 2)	0.0754439	-0.00490196	0.15579	0.0657074	0.703281
Weighted mean MD in tract superior longitudinal fasciculus	Family and friend visits (group 1)	-0.0968919	-0.199423	0.00563975	0.0639996	0.703281
Weighted mean MD in tract superior longitudinal fasciculus	Adult educational classes (group 3)	0.0990358	-0.00620934	0.204281	0.0651312	0.703281
Weighted mean MD in tract superior thalamic radiation	Family and friend visits (group 1)	-0.0960703	-0.197566	0.00542545	0.0635648	0.703281
Weighted mean MD in tract superior thalamic radiation	Sports club/gym attendance (group 1)	0.0656723	-0.00405227	0.135397	0.0648803	0.703281
Weighted mean MD in tract uncinate fasciculus	Adult educational classes (group 2)	0.0866443	-0.00466658	0.177955	0.0629107	0.703281
Connectivity between right FPN and posterior DMN	Leisure-time computer use (group 3)	0.132629	-0.0102192	0.275476	0.0687919	0.705672
Volume of GM in middle temporal gyrus temporooccipital part	Sports club/gym attendance (group 2)	-0.0616615	-0.128181	0.00485818	0.0692393	0.708134
Weighted mean FA in tract inferior longitudinal fasciculus	Family and friend visits (group 3)	0.0712242	-0.00562267	0.148071	0.0692794	0.708134
Connectivity between right FPN and precuneus/ PCC DMN	Leisure-time computer use (group 3)	-0.131956	-0.274455	0.0105441	0.0695281	0.708984
Connectivity between CN and BGN	Family and friend visits (group 3)	0.0725298	-0.00596439	0.151024	0.0701298	0.708984
Connectivity between posterior DMN2 and SMN2	Family and friend visits (group 1)	0.101325	-0.00840284	0.211052	0.0703101	0.708984
Connectivity between medial VN and left FPN	Leisure-time computer use (group 3)	0.131513	-0.0109104	0.273936	0.0703182	0.708984
Connectivity between posterior DMN and medial VN2	Religious activities (group 2)	-0.124041	-0.258381	0.0102997	0.0703374	0.708984
Connectivity between AN and AN2	Religious activities (group 2)	0.123281	-0.0102845	0.256846	0.0704381	0.708984
Connectivity between posterior DMN and AN	Adult educational classes (group 1)	-0.0794915	-0.165732	0.00674931	0.0708229	0.708984
Connectivity between anterior DMN and precuneus/ PCC DMN	Pubs/social clubs (group 1)	0.0748385	-0.00644262	0.15612	0.0711298	0.708984
Connectivity between posterior DMN2 and SMN3	Pubs/social clubs (group 3)	-0.0551098	-0.115092	0.00487276	0.0717373	0.708984
Connectivity between medial VN2 and BGN	Adult educational classes (group 1)	0.0792917	-0.00708118	0.165665	0.0719686	0.708984
Connectivity between anterior DMN and posterior DMN2	Family and friend visits (group 2)	0.0953174	-0.00851577	0.199151	0.0719779	0.708984
Connectivity between lateral VN2 and precuneus/ PCC DMN	Family and friend visits (group 3)	-0.0731069	-0.152948	0.00673408	0.0727027	0.708984
Connectivity between lateral VN and medial VN2	Family and friend visits (group 2)	0.0955703	-0.00884202	0.199983	0.072809	0.708984
Connectivity between medial VN and anterior DMN2	Adult educational classes (group 1)	-0.0788805	-0.165277	0.00751554	0.073533	0.708984
Connectivity between CN and BGN	Adult educational classes (group 3)	0.100837	-0.00970858	0.211383	0.0737966	0.708984
Connectivity between posterior DMN and left CON	Family and friend visits (group 1)	-0.0993647	-0.208403	0.00967336	0.0740789	0.708984
Connectivity between left FPN and SMN3	Family and friend visits (group 1)	-0.0995714	-0.208892	0.00974935	0.0742267	0.708984
Connectivity between SMN3 and right CON	Adult educational classes (group 2)	-0.0876328	-0.183855	0.0085893	0.0742535	0.708984
Connectivity between SMN2 and left CON	Family and friend visits (group 3)	-0.0727672	-0.152685	0.00715023	0.0743186	0.708984
Connectivity between lateral VN and posterior DMN2	Adult educational classes (group 3)	-0.101086	-0.212128	0.00995541	0.0743773	0.708984
Connectivity between SMN2 and AN	Religious activities (group 2)	0.122022	-0.0120308	0.256075	0.0744066	0.708984
Connectivity between lateral VN and CN	Sports club/gym attendance (group 3)	0.0488551	-0.00482742	0.102538	0.0744635	0.708984
Connectivity between lateral VN and medial VN	Family and friend visits (group 1)	0.0994587	-0.00985995	0.208777	0.0745493	0.708984
Connectivity between CN and right CON	Religious activities (group 3)	-0.053255	-0.111842	0.00533216	0.0748105	0.708984
Connectivity between lateral VN2 and right CON	Religious activities (group 1)	0.137187	-0.0138273	0.288202	0.0749865	0.708984
Connectivity between SMN and medial VN	Religious activities (group 1)	-0.137179	-0.288389	0.01403	0.0753792	0.708984
Connectivity between medial VN and left FPN	Adult educational classes (group 1)	-0.0780079	-0.164036	0.00801998	0.0755208	0.708984
Connectivity between SMN3 and AN2	Sports club/gym attendance (group 3)	0.048595	-0.00505433	0.102244	0.0758388	0.708984
Connectivity between SMN2 and SMN3	Adult educational classes (group 3)	0.101081	-0.0105719	0.212733	0.0759927	0.708984
Connectivity between ECN and AN2	Adult educational classes (group 2)	0.0879538	-0.00924386	0.185151	0.0761281	0.708984
Connectivity between right FPN and AN2	Sports club/gym attendance (group 3)	0.0487084	-0.00519044	0.102607	0.0765168	0.708984
Connectivity between anterior DMN2 and right CON	Leisure-time computer use (group 1)	-0.180808	-0.381136	0.0195203	0.0768895	0.708984
Connectivity between right FPN and SMN3	Pubs/social clubs (group 3)	0.0543124	-0.00593698	0.114562	0.0772494	0.708984
Connectivity between SMN3 and CN	Adult educational classes (group 1)	0.0756832	-0.00833247	0.159699	0.0774589	0.708984
Connectivity between medial VN2 and SMN2	Sports club/gym attendance (group 1)	0.0676495	-0.0074743	0.142773	0.0775627	0.708984
Connectivity between AN and CN	Religious activities (group 2)	0.120213	-0.0132896	0.253716	0.07758	0.708984
Connectivity between SMN2 and anterior DMN2	Adult educational classes (group 2)	-0.0874824	-0.184638	0.00967353	0.0775871	0.708984
Connectivity between medial VN and BGN	Religious activities (group 2)	-0.121093	-0.255642	0.0134559	0.0777323	0.708984
Connectivity between SMN2 and AN	Family and friend visits (group 3)	0.0716355	-0.0079676	0.151239	0.07776	0.708984
Connectivity between SMN3 and CN	Religious activities (group 2)	0.118099	-0.013215	0.249414	0.07794	0.708984
Connectivity between SMN and right FPN	Religious activities (group 1)	-0.135714	-0.286635	0.0152066	0.0779805	0.708984
Connectivity between SMN2 and precuneus/ PCC DMN	Adult educational classes (group 2)	0.0873528	-0.00981037	0.184516	0.0780497	0.708984
Connectivity between SMN and SMN3	Adult educational classes (group 3)	-0.0978873	-0.206831	0.0110565	0.0782221	0.708984
Connectivity between AN and CN	Pubs/social clubs (group 1)	-0.0739885	-0.156452	0.00847512	0.0786494	0.708984
Connectivity between left FPN and posterior DMN2	Pubs/social clubs (group 3)	-0.0537602	-0.113688	0.00616804	0.0786993	0.708984
Connectivity between right FPN and right CON	Religious activities (group 1)	0.135109	-0.0157464	0.285965	0.079186	0.708984
Connectivity between posterior DMN and CN	Adult educational classes (group 1)	-0.0772012	-0.163411	0.00900859	0.0792247	0.708984
Connectivity between posterior DMN and right CON	Religious activities (group 2)	0.120963	-0.0141525	0.256078	0.0793079	0.708984
Connectivity between CN and precuneus/ PCC DMN	Adult educational classes (group 1)	-0.0755085	-0.159855	0.00883793	0.0793203	0.708984
Connectivity between SMN and right FPN	Adult educational classes (group 3)	-0.100806	-0.213445	0.0118317	0.0794078	0.708984
Connectivity between lateral VN and medial VN2	Leisure-time computer use (group 1)	-0.180879	-0.383135	0.021377	0.0796265	0.708984
Connectivity between left CON and AN2	Religious activities (group 2)	-0.119765	-0.253688	0.0141573	0.0796332	0.708984
Connectivity between CN and BGN	Sports club/gym attendance (group 2)	0.067054	-0.00793663	0.142045	0.0796743	0.708984
Connectivity between AN2 and BGN	Pubs/social clubs (group 1)	-0.0741747	-0.157152	0.0088022	0.0797569	0.708984
Connectivity between SMN and BGN	Sports club/gym attendance (group 3)	0.0480214	-0.00571511	0.101758	0.0798493	0.708984
Connectivity between anterior DMN and posterior DMN2	Leisure-time computer use (group 2)	-0.142209	-0.301352	0.0169339	0.0798669	0.708984
Connectivity between anterior DMN and left FPN	Sports club/gym attendance (group 3)	-0.0484231	-0.102632	0.00578543	0.0799746	0.708984
Connectivity between medial VN and medial VN2	Family and friend visits (group 2)	-0.0933202	-0.197811	0.0111705	0.080035	0.708984
Connectivity between medial VN2 and SMN2	Religious activities (group 3)	0.0522748	-0.00629641	0.110846	0.0802365	0.708984
Connectivity between posterior DMN and SMN3	Leisure-time computer use (group 2)	0.142814	-0.0172109	0.302838	0.0802539	0.708984
Connectivity between right FPN and posterior DMN	Leisure-time computer use (group 2)	0.143213	-0.0173019	0.303728	0.0803347	0.708984
Connectivity between CN and right CON	Adult educational classes (group 1)	-0.0766989	-0.162689	0.00929079	0.0804213	0.708984
Connectivity between anterior DMN and CN	Family and friend visits (group 2)	-0.0917431	-0.194634	0.0111478	0.0805233	0.708984
Connectivity between left FPN and lateral VN2	Family and friend visits (group 1)	0.0978556	-0.0119306	0.207642	0.0806339	0.708984
Global WMH volume	Sports club/gym attendance (group 3)	0.0418337	-0.00372524	0.0873926	0.0719016	0.708984
Volume of GM in brainstem	Adult educational classes (group 1)	-0.069363	-0.146748	0.00802174	0.0789451	0.708984
Volume of GM in cingulate gyrus posterior division	Leisure-time computer use (group 3)	0.093413	-0.00880953	0.195636	0.0732782	0.708984
Volume of GM in frontal pole	Family and friend visits (group 1)	0.0662604	-0.00730673	0.139828	0.077506	0.708984
Volume of GM in frontal pole	Family and friend visits (group 3)	0.048036	-0.00559342	0.101665	0.0791582	0.708984
Volume of GM in inferior frontal gyrus pars triangularis	Family and friend visits (group 1)	0.0919372	-0.00849816	0.192373	0.0727869	0.708984
Volume of GM in inferior frontal gyrus pars triangularis	Pubs/social clubs (group 3)	-0.0503838	-0.10554	0.00477284	0.073389	0.708984
Volume of GM in inferior temporal gyrus posterior division	Pubs/social clubs (group 1)	-0.0637497	-0.133976	0.00647672	0.0751994	0.708984
Volume of GM in insular cortex	Religious activities (group 3)	-0.0381431	-0.0799412	0.00365503	0.0736768	0.708984
Volume of GM in ix cerebellum	Pubs/social clubs (group 3)	-0.0511352	-0.107884	0.00561343	0.0773734	0.708984
Volume of GM in middle temporal gyrus anterior division	Leisure-time computer use (group 3)	0.11056	-0.0110998	0.23222	0.0748822	0.708984
Volume of GM in superior frontal gyrus	Leisure-time computer use (group 2)	0.12059	-0.0124218	0.253602	0.0755733	0.708984
Volume of GM in temporal fusiform cortex posterior division	Adult educational classes (group 2)	-0.0705598	-0.146973	0.00585364	0.0703179	0.708984
Volume of GM in temporal fusiform cortex posterior division	Pubs/social clubs (group 3)	0.0422211	-0.00512778	0.0895699	0.0805069	0.708984
Volume of GM in vermis x cerebellum	Adult educational classes (group 1)	0.0753556	-0.00765622	0.158368	0.0752008	0.708984
Volume of GM in viiib cerebellum	Pubs/social clubs (group 2)	0.0702565	-0.00614605	0.146659	0.0714925	0.708984
Volume of thalamus	Religious activities (group 3)	-0.036189	-0.0766626	0.00428451	0.0796826	0.708984
Global WM volume	Leisure-time computer use (group 3)	0.0661167	-0.00538588	0.137619	0.0699296	0.708984
Weighted mean FA in tract acoustic radiation	Pubs/social clubs (group 2)	0.0744293	-0.0079692	0.156828	0.0766523	0.708984
Weighted mean FA in tract acoustic radiation	Religious activities (group 2)	-0.119168	-0.25125	0.0129135	0.0769967	0.708984
Weighted mean FA in tract anterior thalamic radiation	Adult educational classes (group 2)	-0.0840009	-0.17658	0.00857833	0.0753386	0.708984
Weighted mean FA in tract cingulate gyrus part of cingulum	Leisure-time computer use (group 3)	-0.123436	-0.26184	0.0149678	0.0804552	0.708984
Weighted mean FA in tract inferior frontooccipital fasciculus	Adult educational classes (group 2)	-0.0866548	-0.180555	0.00724503	0.070486	0.708984
Weighted mean MD in tract cingulate gyrus part of cingulum	Adult educational classes (group 2)	0.0853856	-0.00955119	0.180322	0.0779299	0.708984
Weighted mean MD in tract inferior frontooccipital fasciculus	Religious activities (group 2)	0.111683	-0.0131818	0.236547	0.0795849	0.708984
Weighted mean MD in tract posterior thalamic radiation	Family and friend visits (group 1)	-0.091196	-0.190064	0.0076716	0.0706193	0.708984
Weighted mean MD in tract posterior thalamic radiation	Family and friend visits (group 3)	-0.0649343	-0.137008	0.00713887	0.077417	0.708984
Connectivity between left FPN and CN	Family and friend visits (group 2)	0.0927302	-0.0114274	0.196888	0.0809882	0.710405
Connectivity between anterior DMN and medial VN2	Family and friend visits (group 3)	0.0712789	-0.00890757	0.151465	0.0814578	0.710405
Connectivity between anterior DMN and medial VN2	Sports club/gym attendance (group 1)	0.0671354	-0.00841805	0.142689	0.0815719	0.710405
Connectivity between left CON and precuneus/ PCC DMN	Family and friend visits (group 2)	-0.0924887	-0.196659	0.0116816	0.0818196	0.710405
Connectivity between anterior DMN2 and lateral VN2	Adult educational classes (group 1)	-0.0765819	-0.162857	0.00969348	0.0818938	0.710405
Connectivity between posterior DMN2 and SMN2	Adult educational classes (group 1)	0.0765056	-0.0096891	0.1627	0.0819125	0.710405
Volume of GM in cingulate gyrus posterior division	Leisure-time computer use (group 2)	0.102126	-0.0127396	0.216991	0.0813973	0.710405
Volume of GM in superior frontal gyrus	Sports club/gym attendance (group 1)	0.0556201	-0.0069139	0.118154	0.0812786	0.710405
Volume of GM in superior frontal gyrus	Family and friend visits (group 2)	0.077167	-0.00960181	0.163936	0.0813119	0.710405
Connectivity between posterior DMN2 and SMN2	Sports club/gym attendance (group 1)	0.0668584	-0.00850732	0.142224	0.0820748	0.710736
Weighted mean MD in tract acoustic radiation	Family and friend visits (group 2)	-0.0917888	-0.195346	0.0117687	0.0823385	0.711942
Volume of GM in frontal operculum cortex	Leisure-time computer use (group 1)	0.154373	-0.019869	0.328615	0.0824724	0.71197
Volume of GM in inferior temporal gyrus temporooccipital part	Leisure-time computer use (group 3)	0.107311	-0.0138584	0.228481	0.0825905	0.71197
Weighted mean MD in tract superior longitudinal fasciculus	Sports club/gym attendance (group 3)	0.0446491	-0.0058796	0.0951777	0.0832824	0.716391
Weighted mean MD in tract superior longitudinal fasciculus	Adult educational classes (group 2)	0.080247	-0.0105883	0.171082	0.0833536	0.716391
Volume of GM in vermis crus ii cerebellum	Religious activities (group 2)	0.11711	-0.0155254	0.249745	0.0835241	0.716779
Connectivity between posterior DMN and lateral VN2	Sports club/gym attendance (group 1)	-0.0665796	-0.142037	0.00887807	0.0837351	0.71713
Connectivity between medial VN2 and CN	Adult educational classes (group 2)	0.0857165	-0.0115156	0.182949	0.084008	0.71713
Connectivity between posterior DMN2 and ECN	Religious activities (group 3)	-0.0518205	-0.11066	0.00701883	0.0843086	0.71713
Connectivity between left FPN and precuneus/ PCC DMN	Sports club/gym attendance (group 2)	-0.0669617	-0.143176	0.00925244	0.0850557	0.71713
Connectivity between anterior DMN2 and right CON	Pubs/social clubs (group 3)	0.052344	-0.00723538	0.111923	0.0850701	0.71713
Connectivity between lateral VN and SMN	Pubs/social clubs (group 2)	0.0740693	-0.0102395	0.158378	0.085074	0.71713
Connectivity between anterior DMN and lateral VN2	Family and friend visits (group 3)	0.0701966	-0.0097202	0.150113	0.0851368	0.71713
Connectivity between SMN and medial VN	Religious activities (group 3)	-0.0516975	-0.11056	0.00716527	0.0851721	0.71713
Connectivity between SMN3 and CN	Sports club/gym attendance (group 1)	0.0643312	-0.00903347	0.137696	0.0856718	0.71713
Connectivity between left CON and precuneus/ PCC DMN	Religious activities (group 2)	0.117592	-0.0166151	0.251799	0.0859116	0.71713
Connectivity between anterior DMN and left FPN	Adult educational classes (group 3)	-0.0989469	-0.211876	0.0139827	0.0859173	0.71713
Connectivity between posterior DMN2 and left CON	Family and friend visits (group 3)	-0.0697887	-0.149448	0.00987042	0.0859496	0.71713
Connectivity between posterior DMN and posterior DMN2	Religious activities (group 1)	-0.131616	-0.281935	0.0187036	0.0861349	0.71713
Connectivity between lateral VN and BGN	Pubs/social clubs (group 2)	-0.0737691	-0.158032	0.010494	0.0861755	0.71713
Connectivity between lateral VN and posterior DMN	Adult educational classes (group 1)	0.0750121	-0.0108113	0.160836	0.0866907	0.71713
Connectivity between anterior DMN and SMN	Sports club/gym attendance (group 3)	-0.0471244	-0.101044	0.00679563	0.0867123	0.71713
Connectivity between posterior DMN and anterior DMN2	Religious activities (group 1)	-0.132235	-0.283592	0.0191215	0.0868215	0.71713
Connectivity between medial VN and AN2	Religious activities (group 3)	-0.0514058	-0.110247	0.00743492	0.0868296	0.71713
Connectivity between SMN and SMN2	Sports club/gym attendance (group 3)	0.0473024	-0.00686392	0.101469	0.0869606	0.71713
Connectivity between lateral VN2 and precuneus/ PCC DMN	Family and friend visits (group 1)	-0.0956195	-0.205143	0.0139038	0.0870432	0.71713
Connectivity between left FPN and BGN	Religious activities (group 1)	-0.131823	-0.283036	0.019391	0.0875099	0.71713
Connectivity between posterior DMN2 and AN	Sports club/gym attendance (group 2)	-0.0665598	-0.14295	0.00983075	0.0876753	0.71713
Connectivity between AN and ECN	Sports club/gym attendance (group 3)	0.0471946	-0.00699147	0.101381	0.0877977	0.71713
Connectivity between lateral VN and SMN	Family and friend visits (group 1)	-0.0958263	-0.205889	0.0142364	0.0879147	0.71713
Connectivity between anterior DMN and AN	Family and friend visits (group 2)	0.0910559	-0.0136153	0.195727	0.0881806	0.71713
Connectivity between lateral VN and SMN2	Religious activities (group 2)	-0.116827	-0.251144	0.017489	0.0882285	0.71713
Connectivity between right FPN and anterior DMN2	Sports club/gym attendance (group 1)	-0.065412	-0.140669	0.00984478	0.088451	0.71713
Global WMH volume	Religious activities (group 2)	0.0996079	-0.0139236	0.213139	0.0854967	0.71713
Global GM volume	Adult educational classes (group 1)	0.0364872	-0.00546476	0.0784391	0.0882484	0.71713
Volume of GM in cuneal cortex	Family and friend visits (group 1)	0.0832483	-0.0123949	0.178891	0.0880047	0.71713
Volume of GM in superior temporal gyrus anterior division	Pubs/social clubs (group 1)	-0.0621735	-0.133503	0.00915578	0.0875548	0.71713
Volume of GM in superior temporal gyrus anterior division	Adult educational classes (group 2)	-0.0724785	-0.155778	0.0108209	0.0881174	0.71713
Volume of GM in temporal fusiform cortex anterior division	Leisure-time computer use (group 1)	0.145287	-0.0207236	0.311298	0.0862811	0.71713
Volume of GM in vermis crus i cerebellum	Pubs/social clubs (group 3)	-0.0524547	-0.112662	0.00775248	0.0877017	0.71713
Volume of GM in vermis crus ii cerebellum	Pubs/social clubs (group 3)	-0.0521748	-0.111495	0.00714527	0.0847198	0.71713
Weighted mean FA in tract inferior frontooccipital fasciculus	Adult educational classes (group 3)	-0.0945791	-0.203375	0.0142167	0.0883987	0.71713
Weighted mean MD in tract acoustic radiation	Religious activities (group 2)	0.11603	-0.0173871	0.249447	0.08827	0.71713
Weighted mean MD in tract inferior frontooccipital fasciculus	Family and friend visits (group 1)	-0.0888018	-0.190504	0.0129003	0.0870054	0.71713
Weighted mean MD in tract superior longitudinal fasciculus	Family and friend visits (group 3)	-0.0656165	-0.140361	0.00912769	0.085311	0.71713
Connectivity between posterior DMN and right CON	Adult educational classes (group 3)	0.0981498	-0.0148205	0.21112	0.0885878	0.717223
Connectivity between lateral VN and posterior DMN2	Leisure-time computer use (group 3)	0.122144	-0.0185035	0.262791	0.0887237	0.717309
Connectivity between medial VN2 and CN	Family and friend visits (group 2)	0.0907552	-0.013852	0.195362	0.0890399	0.717663
Connectivity between SMN3 and BGN	Family and friend visits (group 3)	-0.0683549	-0.147154	0.0104442	0.0890854	0.717663
Connectivity between SMN and CN	Pubs/social clubs (group 1)	-0.0718768	-0.154855	0.0111017	0.0895458	0.717663
Connectivity between lateral VN and lateral VN2	Family and friend visits (group 1)	-0.0940486	-0.202697	0.0145999	0.0897636	0.717663
Connectivity between posterior DMN2 and SMN3	Adult educational classes (group 2)	0.0837465	-0.0130405	0.180533	0.0898959	0.717663
Volume of GM in inferior temporal gyrus temporooccipital part	Family and friend visits (group 3)	0.0587878	-0.00914545	0.126721	0.089855	0.717663
Volume of GM in supramarginal gyrus anterior division	Sports club/gym attendance (group 3)	0.0420393	-0.0064489	0.0905274	0.0892539	0.717663
Volume of GM in v cerebellum	Pubs/social clubs (group 3)	-0.0461097	-0.0993952	0.00717576	0.0898707	0.717663
Weighted mean MD in tract forceps minor	Adult educational classes (group 3)	0.094476	-0.0145652	0.203517	0.0894666	0.717663
Connectivity between lateral VN and SMN3	Sports club/gym attendance (group 3)	-0.0467919	-0.100891	0.00730759	0.0900231	0.717678
Connectivity between right FPN and SMN3	Sports club/gym attendance (group 3)	-0.0466994	-0.100765	0.00736639	0.0904594	0.717773
Global WMH volume	Family and friend visits (group 1)	-0.0798677	-0.172326	0.0125907	0.0904325	0.717773
Weighted mean FA in tract anterior thalamic radiation	Leisure-time computer use (group 3)	-0.117306	-0.253148	0.0185365	0.0905367	0.717773
Weighted mean MD in tract inferior frontooccipital fasciculus	Leisure-time computer use (group 2)	0.128354	-0.0202288	0.276938	0.0904204	0.717773
Connectivity between SMN and left CON	Sports club/gym attendance (group 2)	-0.0658959	-0.142251	0.0104595	0.0907343	0.718345
Connectivity between medial VN2 and anterior DMN2	Leisure-time computer use (group 2)	-0.138133	-0.298298	0.0220312	0.0909473	0.719036
Connectivity between SMN and precuneus/ PCC DMN	Religious activities (group 2)	-0.116372	-0.251492	0.0187479	0.0913963	0.719581
Connectivity between lateral VN and AN	Sports club/gym attendance (group 1)	-0.0650097	-0.140524	0.0105044	0.09153	0.719581
Connectivity between lateral VN2 and precuneus/ PCC DMN	Religious activities (group 2)	-0.115656	-0.250145	0.0188326	0.0918791	0.719581
Connectivity between anterior DMN and left FPN	Sports club/gym attendance (group 2)	-0.0658703	-0.142482	0.0107415	0.0919454	0.719581
Connectivity between lateral VN and lateral VN2	Religious activities (group 2)	-0.114657	-0.24807	0.0187555	0.0920876	0.719581
Connectivity between AN and CN	Sports club/gym attendance (group 2)	0.0649978	-0.0106749	0.14067	0.0922709	0.719581
Connectivity between medial VN and left FPN	Pubs/social clubs (group 2)	-0.072036	-0.15594	0.011868	0.0924155	0.719581
Connectivity between left FPN and ECN	Religious activities (group 2)	-0.115212	-0.249494	0.0190694	0.0926292	0.719581
Connectivity between CN and AN2	Leisure-time computer use (group 2)	0.135958	-0.0225625	0.294478	0.0927515	0.719581
Connectivity between medial VN and right CON	Family and friend visits (group 2)	-0.0898828	-0.194787	0.0150212	0.0930786	0.719581
Connectivity between posterior DMN2 and ECN	Sports club/gym attendance (group 1)	-0.0646472	-0.140128	0.0108338	0.0932085	0.719581
Connectivity between posterior DMN2 and anterior DMN2	Adult educational classes (group 1)	-0.0737951	-0.159976	0.0123854	0.093279	0.719581
Volume of GM in cingulate gyrus posterior division	Sports club/gym attendance (group 2)	-0.047146	-0.101911	0.00761932	0.091538	0.719581
Volume of GM in heschls gyrus includes h1 and h2	Family and friend visits (group 3)	0.0554813	-0.00899333	0.119956	0.0916736	0.719581
Volume of GM in supramarginal gyrus anterior division	Leisure-time computer use (group 1)	0.156513	-0.0251574	0.338183	0.0912942	0.719581
Volume of hippocampus	Sports club/gym attendance (group 2)	-0.0579758	-0.125579	0.0096273	0.0927809	0.719581
Weighted mean FA in tract superior longitudinal fasciculus	Leisure-time computer use (group 3)	-0.118656	-0.256849	0.0195381	0.0923905	0.719581
Weighted mean MD in tract forceps major	Adult educational classes (group 1)	-0.0738136	-0.159919	0.0122916	0.0929112	0.719581
Weighted mean MD in tract cingulate gyrus part of cingulum	Leisure-time computer use (group 1)	0.169375	-0.0285396	0.367291	0.0934652	0.720047
Connectivity between medial VN and BGN	Leisure-time computer use (group 2)	-0.137014	-0.297186	0.0231575	0.0936102	0.720194
Volume of GM in supramarginal gyrus posterior division	Adult educational classes (group 1)	-0.0650595	-0.141167	0.0110476	0.0938323	0.720934
Connectivity between anterior DMN2 and AN2	Pubs/social clubs (group 3)	-0.050802	-0.110355	0.0087509	0.09452	0.722227
Connectivity between SMN and CN	Family and friend visits (group 2)	0.0887533	-0.0155094	0.193016	0.0952215	0.722227
Connectivity between lateral VN and medial VN2	Leisure-time computer use (group 2)	-0.136197	-0.296239	0.0238458	0.0953162	0.722227
Connectivity between medial VN and BGN	Adult educational classes (group 3)	-0.0957613	-0.208305	0.0167826	0.0953643	0.722227
Connectivity between ECN and AN2	Sports club/gym attendance (group 1)	-0.0640928	-0.139419	0.0112334	0.0953682	0.722227
Connectivity between SMN2 and AN	Religious activities (group 1)	0.127769	-0.0223956	0.277934	0.0953719	0.722227
Connectivity between left FPN and posterior DMN	Adult educational classes (group 2)	0.0823796	-0.0144589	0.179218	0.0954379	0.722227
Connectivity between posterior DMN and precuneus/ PCC DMN	Sports club/gym attendance (group 3)	-0.0455946	-0.0993431	0.00815393	0.0963744	0.722227
Connectivity between SMN3 and AN2	Leisure-time computer use (group 2)	-0.134925	-0.294036	0.0241862	0.0964934	0.722227
Connectivity between posterior DMN and AN	Pubs/social clubs (group 1)	0.0705504	-0.0127122	0.153813	0.0967559	0.722227
Connectivity between left FPN and lateral VN2	Leisure-time computer use (group 1)	-0.171655	-0.374338	0.0310282	0.0969181	0.722227
Connectivity between lateral VN and SMN2	Religious activities (group 1)	-0.127279	-0.277739	0.0231805	0.0973039	0.722227
Connectivity between SMN and left FPN	Leisure-time computer use (group 1)	0.171958	-0.0314525	0.375369	0.0975261	0.722227
Connectivity between right FPN and lateral VN2	Leisure-time computer use (group 3)	0.120799	-0.0222207	0.263818	0.0978207	0.722227
Connectivity between SMN and medial VN2	Sports club/gym attendance (group 3)	-0.045584	-0.0996244	0.00845651	0.098265	0.722227
Connectivity between AN and CN	Pubs/social clubs (group 2)	-0.0702198	-0.153493	0.0130536	0.0983732	0.722227
Connectivity between anterior DMN and precuneus/ PCC DMN	Leisure-time computer use (group 2)	-0.131944	-0.288513	0.0246262	0.0985848	0.722227
Connectivity between lateral VN and left FPN	Sports club/gym attendance (group 1)	-0.0633931	-0.138627	0.0118404	0.0986233	0.722227
Connectivity between anterior DMN and medial VN	Adult educational classes (group 3)	-0.0947604	-0.207331	0.0178107	0.0989574	0.722227
Connectivity between medial VN and ECN	Adult educational classes (group 1)	0.0720453	-0.0135882	0.157679	0.0991427	0.722227
Connectivity between left CON and right CON	Leisure-time computer use (group 3)	-0.119754	-0.262137	0.0226296	0.0992454	0.722227
Connectivity between posterior DMN2 and right CON	Adult educational classes (group 1)	0.072594	-0.013749	0.158937	0.099367	0.722227
Connectivity between posterior DMN and BGN	Adult educational classes (group 2)	-0.0819284	-0.179444	0.0155874	0.0996117	0.722227
Connectivity between CN and precuneus/ PCC DMN	Pubs/social clubs (group 1)	-0.0683072	-0.149699	0.0130843	0.09998	0.722227
Connectivity between posterior DMN and medial VN2	Sports club/gym attendance (group 2)	-0.0639321	-0.140122	0.0122573	0.100029	0.722227
Connectivity between anterior DMN2 and precuneus/ PCC DMN	Sports club/gym attendance (group 3)	0.045061	-0.00865022	0.0987722	0.100099	0.722227
Connectivity between anterior DMN and lateral VN2	Family and friend visits (group 1)	0.0918897	-0.0177376	0.201517	0.100402	0.722227
Connectivity between medial VN and right CON	Religious activities (group 2)	0.113269	-0.0218647	0.248402	0.100403	0.722227
Connectivity between medial VN and right CON	Religious activities (group 1)	0.126858	-0.024517	0.278233	0.100468	0.722227
Connectivity between right FPN and lateral VN2	Religious activities (group 3)	-0.0493414	-0.108243	0.00955986	0.100606	0.722227
Connectivity between posterior DMN2 and SMN2	Family and friend visits (group 3)	0.0669624	-0.0130275	0.146952	0.100834	0.722227
Connectivity between right FPN and left CON	Sports club/gym attendance (group 2)	-0.0632266	-0.13878	0.0123269	0.100953	0.722227
Connectivity between right FPN and SMN2	Adult educational classes (group 3)	0.0942284	-0.0184312	0.206888	0.101134	0.722227
Connectivity between posterior DMN and right CON	Pubs/social clubs (group 1)	-0.0697925	-0.153237	0.0136517	0.101135	0.722227
Connectivity between right FPN and SMN3	Leisure-time computer use (group 2)	-0.133954	-0.294136	0.0262287	0.101192	0.722227
Volume of amygdala	Leisure-time computer use (group 1)	-0.158336	-0.345729	0.0290575	0.097699	0.722227
Volume of GM in crus i cerebellum	Religious activities (group 2)	0.1004	-0.0175281	0.218328	0.0951751	0.722227
Volume of GM in frontal operculum cortex	Religious activities (group 3)	0.0427999	-0.00774916	0.0933489	0.0970019	0.722227
Volume of GM in inferior temporal gyrus posterior division	Adult educational classes (group 1)	-0.0616655	-0.134377	0.0110462	0.0964578	0.722227
Volume of GM in insular cortex	Adult educational classes (group 2)	-0.0589408	-0.128108	0.0102261	0.0948697	0.722227
Volume of GM in middle frontal gyrus	Adult educational classes (group 1)	0.0587386	-0.0113872	0.128864	0.100638	0.722227
Volume of GM in paracingulate gyrus	Sports club/gym attendance (group 2)	0.0520836	-0.00946645	0.113634	0.0971998	0.722227
Volume of GM in parahippocampal gyrus posterior division	Adult educational classes (group 2)	-0.0731497	-0.159273	0.012974	0.0959586	0.722227
Volume of GM in parietal operculum cortex	Sports club/gym attendance (group 1)	0.0517907	-0.00989645	0.113478	0.0998476	0.722227
Volume of GM in precentral gyrus	Adult educational classes (group 3)	0.0754172	-0.0131956	0.16403	0.0952837	0.722227
Volume of GM in temporal fusiform cortex anterior division	Sports club/gym attendance (group 2)	-0.0533546	-0.116003	0.00929408	0.0950657	0.722227
Volume of GM in vermis crus i cerebellum	Leisure-time computer use (group 1)	-0.171058	-0.373338	0.0312228	0.0974185	0.722227
Volume of GM in x cerebellum	Leisure-time computer use (group 3)	0.105882	-0.0189952	0.230759	0.0965337	0.722227
Volume of hippocampus	Pubs/social clubs (group 2)	0.0627191	-0.0116172	0.137055	0.0981831	0.722227
Volume of hippocampus	Religious activities (group 3)	-0.0438215	-0.0957912	0.00814823	0.0983859	0.722227
Volume of pallidum	Sports club/gym attendance (group 3)	0.0402544	-0.00743926	0.0879481	0.0980639	0.722227
Global WM volume	Leisure-time computer use (group 1)	0.086008	-0.0155302	0.187546	0.0968638	0.722227
Global WM volume	Pubs/social clubs (group 3)	-0.0253703	-0.0555719	0.00483122	0.0996605	0.722227
Weighted mean FA in tract forceps minor	Adult educational classes (group 3)	-0.090735	-0.198199	0.0167293	0.0979419	0.722227
Weighted mean FA in tract superior thalamic radiation	Religious activities (group 2)	-0.110031	-0.2411	0.021039	0.0998832	0.722227
Weighted mean MD in tract forceps minor	Religious activities (group 1)	-0.123245	-0.269268	0.0227768	0.0980645	0.722227
Weighted mean MD in tract superior thalamic radiation	Adult educational classes (group 3)	0.0877726	-0.0164468	0.191992	0.098794	0.722227
Connectivity between left CON and right CON	Leisure-time computer use (group 2)	-0.133522	-0.293515	0.0264706	0.10189	0.72372
Volume of GM in parahippocampal gyrus posterior division	Adult educational classes (group 3)	0.0833327	-0.0164532	0.183119	0.101659	0.72372
Volume of GM in temporal occipital fusiform cortex	Adult educational classes (group 3)	0.0771714	-0.0152692	0.169612	0.10178	0.72372
Volume of GM in vermis crus i cerebellum	Family and friend visits (group 2)	0.0871869	-0.0172899	0.191664	0.101907	0.72372
Connectivity between lateral VN and right FPN	Religious activities (group 2)	-0.112023	-0.246547	0.0225006	0.102636	0.725124
Connectivity between AN and ECN	Adult educational classes (group 3)	0.0939833	-0.018909	0.206876	0.102733	0.725124
Connectivity between anterior DMN and right CON	Adult educational classes (group 1)	-0.0716804	-0.157794	0.0144334	0.10278	0.725124
Connectivity between left CON and precuneus/ PCC DMN	Pubs/social clubs (group 1)	-0.0689976	-0.151904	0.0139084	0.102843	0.725124
Volume of GM in frontal medial cortex	Adult educational classes (group 2)	-0.0732629	-0.1613	0.014774	0.102865	0.725124
Volume of GM in intracalcarine cortex	Religious activities (group 3)	-0.044149	-0.0971941	0.00889606	0.102821	0.725124
Volume of GM in vermis viiib cerebellum	Adult educational classes (group 3)	0.0885214	-0.0179584	0.195001	0.103213	0.726249
Weighted mean MD in tract superior longitudinal fasciculus	Religious activities (group 1)	-0.117199	-0.258201	0.0238031	0.103279	0.726249
Connectivity between lateral VN and precuneus/ PCC DMN	Family and friend visits (group 1)	-0.0913605	-0.201317	0.0185961	0.103406	0.726255
Connectivity between posterior DMN and AN	Sports club/gym attendance (group 1)	-0.0626092	-0.13801	0.0127919	0.103626	0.726318
Connectivity between SMN2 and precuneus/ PCC DMN	Family and friend visits (group 2)	-0.0866041	-0.19116	0.0179514	0.104478	0.726318
Connectivity between anterior DMN2 and right CON	Adult educational classes (group 1)	-0.0705928	-0.155821	0.0146355	0.10449	0.726318
Connectivity between lateral VN and left FPN	Sports club/gym attendance (group 3)	-0.0446691	-0.0986447	0.00930661	0.104784	0.726318
Connectivity between anterior DMN2 and CN	Family and friend visits (group 2)	-0.0858916	-0.189695	0.0179115	0.104839	0.726318
Connectivity between right FPN and BGN	Family and friend visits (group 2)	0.0859065	-0.0179293	0.189742	0.104888	0.726318
Connectivity between SMN and posterior DMN2	Leisure-time computer use (group 2)	-0.13276	-0.293306	0.0277852	0.105055	0.726318
Connectivity between medial VN and posterior DMN2	Religious activities (group 1)	-0.124235	-0.274477	0.026007	0.105069	0.726318
Connectivity between SMN and AN	Pubs/social clubs (group 2)	-0.0698076	-0.154258	0.014643	0.105191	0.726318
Connectivity between anterior DMN and medial VN	Religious activities (group 1)	-0.124579	-0.275407	0.0262494	0.105462	0.726318
Connectivity between left FPN and lateral VN2	Pubs/social clubs (group 3)	-0.0497549	-0.110047	0.0105375	0.105774	0.726318
Connectivity between left FPN and precuneus/ PCC DMN	Adult educational classes (group 3)	0.0926756	-0.0196334	0.204985	0.105792	0.726318
Connectivity between AN and CN	Family and friend visits (group 1)	0.0894589	-0.01928	0.198198	0.106848	0.726318
Connectivity between medial VN2 and BGN	Adult educational classes (group 2)	-0.0800742	-0.177486	0.0173377	0.107138	0.726318
Connectivity between anterior DMN and BGN	Religious activities (group 2)	0.110199	-0.0240637	0.244462	0.10767	0.726318
Connectivity between SMN3 and AN2	Leisure-time computer use (group 1)	-0.164977	-0.366057	0.0361016	0.107804	0.726318
Connectivity between lateral VN and medial VN2	Leisure-time computer use (group 3)	-0.116842	-0.25927	0.0255851	0.107845	0.726318
Connectivity between lateral VN and right CON	Religious activities (group 1)	0.12372	-0.0271229	0.274563	0.107919	0.726318
Connectivity between anterior DMN2 and ECN	Family and friend visits (group 3)	-0.0652879	-0.144895	0.0143193	0.107948	0.726318
Connectivity between medial VN2 and BGN	Religious activities (group 3)	-0.0482538	-0.107122	0.0106139	0.108131	0.726318
Connectivity between SMN and medial VN	Family and friend visits (group 2)	0.0858965	-0.0188994	0.190692	0.10815	0.726318
Connectivity between medial VN2 and right CON	Family and friend visits (group 1)	-0.0900396	-0.19995	0.0198707	0.108341	0.726318
Connectivity between right FPN and AN	Sports club/gym attendance (group 2)	-0.0626215	-0.139066	0.013823	0.108356	0.726318
Connectivity between posterior DMN and BGN	Pubs/social clubs (group 3)	0.0494621	-0.0109524	0.109877	0.108556	0.726318
Connectivity between medial VN2 and BGN	Religious activities (group 2)	-0.110418	-0.245415	0.0245785	0.108893	0.726318
Connectivity between posterior DMN2 and ECN	Pubs/social clubs (group 3)	-0.0493437	-0.109681	0.0109932	0.108949	0.726318
Connectivity between right FPN and AN2	Pubs/social clubs (group 2)	0.0683907	-0.0153712	0.152153	0.109518	0.726318
Connectivity between SMN3 and right CON	Pubs/social clubs (group 1)	-0.0672359	-0.149592	0.01512	0.109554	0.726318
Connectivity between left FPN and posterior DMN2	Religious activities (group 1)	-0.122293	-0.272406	0.0278203	0.110311	0.726318
Connectivity between left FPN and lateral VN2	Sports club/gym attendance (group 3)	0.0440715	-0.0100261	0.098169	0.110313	0.726318
Connectivity between AN and right CON	Adult educational classes (group 2)	-0.0792448	-0.176564	0.018074	0.110481	0.726318
Connectivity between CN and lateral VN2	Pubs/social clubs (group 3)	-0.0490355	-0.109277	0.0112058	0.110611	0.726318
Connectivity between left FPN and SMN3	Pubs/social clubs (group 1)	0.0674926	-0.0154263	0.150412	0.110622	0.726318
Connectivity between posterior DMN2 and lateral VN2	Leisure-time computer use (group 1)	0.164464	-0.037626	0.366554	0.110685	0.726318
Connectivity between CN and precuneus/ PCC DMN	Family and friend visits (group 1)	-0.087268	-0.194581	0.0200451	0.110951	0.726318
Connectivity between left CON and anterior DMN2	Pubs/social clubs (group 3)	0.0490111	-0.0112745	0.109297	0.111051	0.726318
Connectivity between SMN2 and BGN	Family and friend visits (group 1)	0.08811	-0.0202985	0.196518	0.111149	0.726318
Connectivity between SMN2 and AN2	Family and friend visits (group 3)	-0.0647179	-0.144353	0.014917	0.111182	0.726318
Connectivity between medial VN and CN	Adult educational classes (group 3)	0.0911572	-0.0210487	0.203363	0.111302	0.726318
Connectivity between SMN3 and precuneus/ PCC DMN	Sports club/gym attendance (group 1)	0.0610436	-0.0141058	0.136193	0.111352	0.726318
Connectivity between medial VN and BGN	Sports club/gym attendance (group 2)	-0.0619764	-0.138319	0.0143664	0.111563	0.726318
Connectivity between anterior DMN and posterior DMN2	Leisure-time computer use (group 3)	-0.114909	-0.256536	0.0267178	0.111769	0.726318
Connectivity between ECN and precuneus/ PCC DMN	Pubs/social clubs (group 1)	0.0669447	-0.0156045	0.149494	0.111939	0.726318
Connectivity between medial VN2 and posterior DMN2	Leisure-time computer use (group 3)	0.115709	-0.0271129	0.258531	0.112294	0.726318
Connectivity between SMN2 and anterior DMN2	Sports club/gym attendance (group 2)	0.0618268	-0.0145305	0.138184	0.112498	0.726318
Connectivity between SMN and right FPN	Pubs/social clubs (group 1)	0.0673197	-0.0159039	0.150543	0.112855	0.726318
Connectivity between CN and AN2	Leisure-time computer use (group 3)	0.114002	-0.0270703	0.255075	0.113207	0.726318
Connectivity between posterior DMN and BGN	Sports club/gym attendance (group 2)	0.0618738	-0.0147589	0.138506	0.113521	0.726318
Connectivity between right FPN and SMN2	Pubs/social clubs (group 1)	0.067201	-0.0160432	0.150445	0.11358	0.726318
Connectivity between SMN and right FPN	Leisure-time computer use (group 3)	-0.115166	-0.257845	0.0275135	0.113629	0.726318
Connectivity between SMN and ECN	Adult educational classes (group 3)	-0.0905153	-0.202688	0.0216569	0.113734	0.726318
Connectivity between posterior DMN2 and lateral VN2	Sports club/gym attendance (group 3)	0.0434929	-0.0104582	0.0974439	0.114082	0.726318
Connectivity between left FPN and BGN	Pubs/social clubs (group 2)	-0.067863	-0.152072	0.016346	0.114202	0.726318
Connectivity between left FPN and posterior DMN2	Sports club/gym attendance (group 3)	0.043318	-0.0104597	0.0970956	0.114375	0.726318
Connectivity between SMN3 and right CON	Sports club/gym attendance (group 3)	0.0430859	-0.0104203	0.0965922	0.114488	0.726318
Connectivity between ECN and right CON	Pubs/social clubs (group 3)	-0.0480753	-0.107793	0.0116424	0.114582	0.726318
Global GM volume	Religious activities (group 3)	-0.0234813	-0.0520794	0.00511673	0.107538	0.726318
Global GM volume	Leisure-time computer use (group 1)	0.0807836	-0.0178219	0.179389	0.108319	0.726318
Volume of GM in brainstem	Religious activities (group 3)	-0.0427963	-0.0955414	0.00994886	0.111757	0.726318
Volume of GM in cingulate gyrus posterior division	Adult educational classes (group 3)	0.0662114	-0.0145178	0.146941	0.10793	0.726318
Volume of GM in frontal pole	Sports club/gym attendance (group 2)	-0.0419207	-0.0931442	0.00930273	0.108695	0.726318
Volume of GM in heschls gyrus includes h1 and h2	Adult educational classes (group 2)	-0.0644674	-0.142838	0.0139035	0.106892	0.726318
Volume of GM in iiv cerebellum	Adult educational classes (group 3)	-0.0829323	-0.18589	0.0200255	0.114377	0.726318
Volume of GM in inferior frontal gyrus pars triangularis	Leisure-time computer use (group 2)	0.120488	-0.0262158	0.267193	0.107443	0.726318
Volume of GM in inferior temporal gyrus temporooccipital part	Leisure-time computer use (group 2)	0.111209	-0.0249465	0.247365	0.109392	0.726318
Volume of GM in insular cortex	Religious activities (group 1)	-0.0882389	-0.195612	0.0191338	0.10723	0.726318
Volume of GM in lingual gyrus	Religious activities (group 3)	-0.0351817	-0.0777255	0.00736212	0.105047	0.726318
Volume of GM in middle temporal gyrus posterior division	Pubs/social clubs (group 2)	0.0543847	-0.0122609	0.12103	0.109719	0.726318
Volume of GM in planum temporale	Family and friend visits (group 1)	0.0717309	-0.0164863	0.159948	0.110991	0.726318
Volume of GM in subcallosal cortex	Religious activities (group 3)	0.0339983	-0.00812377	0.0761204	0.113642	0.726318
Volume of GM in temporal fusiform cortex anterior division	Religious activities (group 3)	0.039047	-0.00912091	0.0872149	0.112082	0.726318
Volume of GM in ventral striatum	Family and friend visits (group 2)	0.072677	-0.0152816	0.160636	0.105336	0.726318
Volume of GM in ventral striatum	Sports club/gym attendance (group 2)	-0.0518911	-0.11616	0.0123777	0.113521	0.726318
Volume of GM in vermis crus i cerebellum	Religious activities (group 3)	-0.0473287	-0.106034	0.0113763	0.114056	0.726318
Volume of GM in vermis vi cerebellum	Leisure-time computer use (group 2)	0.126513	-0.0259003	0.278926	0.103744	0.726318
Volume of GM in vermis viiia cerebellum	Pubs/social clubs (group 3)	-0.0459912	-0.10258	0.0105976	0.111163	0.726318
Volume of GM in vi cerebellum	Family and friend visits (group 1)	-0.0767023	-0.169987	0.0165825	0.107043	0.726318
Volume of GM in vi cerebellum	Leisure-time computer use (group 3)	0.0993263	-0.0219688	0.220621	0.108483	0.726318
Volume of GM in vi cerebellum	Leisure-time computer use (group 2)	0.110371	-0.0259256	0.246668	0.112462	0.726318
Volume of pallidum	Leisure-time computer use (group 1)	0.144715	-0.0340153	0.323445	0.112507	0.726318
Weighted mean FA in tract cingulate gyrus part of cingulum	Religious activities (group 3)	-0.046324	-0.103324	0.0106762	0.111175	0.726318
Weighted mean FA in tract inferior longitudinal fasciculus	Family and friend visits (group 1)	0.0850196	-0.0203965	0.190436	0.113921	0.726318
Weighted mean FA in tract medial lemniscus	Religious activities (group 2)	-0.107106	-0.236963	0.0227503	0.105953	0.726318
Weighted mean FA in tract middle cerebellar peduncle	Sports club/gym attendance (group 2)	0.0616547	-0.0129107	0.13622	0.105088	0.726318
Weighted mean MD in tract anterior thalamic radiation	Family and friend visits (group 3)	-0.0568732	-0.125892	0.0121459	0.106284	0.726318
Weighted mean MD in tract anterior thalamic radiation	Family and friend visits (group 1)	-0.0764368	-0.171115	0.0182412	0.113554	0.726318
Weighted mean MD in tract corticospinal tract	Family and friend visits (group 1)	-0.0872578	-0.195276	0.0207604	0.113343	0.726318
Weighted mean MD in tract inferior frontooccipital fasciculus	Leisure-time computer use (group 1)	0.151792	-0.035982	0.339566	0.113089	0.726318
Connectivity between AN and right CON	Sports club/gym attendance (group 2)	-0.0614855	-0.137985	0.0150143	0.115172	0.728326
Connectivity between CN and ECN	Leisure-time computer use (group 2)	0.127952	-0.0312921	0.287196	0.11528	0.728326
Volume of GM in v cerebellum	Leisure-time computer use (group 3)	0.101411	-0.0247678	0.22759	0.115184	0.728326
Connectivity between medial VN2 and AN2	Family and friend visits (group 3)	0.0641608	-0.0157769	0.144099	0.11567	0.729982
Connectivity between lateral VN and left FPN	Pubs/social clubs (group 1)	0.0665973	-0.016486	0.149681	0.116153	0.73028
Connectivity between left FPN and ECN	Leisure-time computer use (group 3)	-0.113945	-0.256128	0.0282382	0.116233	0.73028
Connectivity between medial VN and posterior DMN2	Sports club/gym attendance (group 1)	0.0601188	-0.0149282	0.135166	0.116376	0.73028
Connectivity between left FPN and anterior DMN2	Religious activities (group 3)	0.046994	-0.0116991	0.105687	0.116563	0.73028
Volume of caudate	Adult educational classes (group 3)	0.0743808	-0.0183514	0.167113	0.115911	0.73028
Volume of GM in supramarginal gyrus anterior division	Family and friend visits (group 1)	0.0788421	-0.0195402	0.177224	0.116238	0.73028
Weighted mean MD in tract forceps minor	Religious activities (group 3)	-0.0455051	-0.102349	0.0113385	0.116627	0.73028
Weighted mean MD in tract inferior longitudinal fasciculus	Family and friend visits (group 3)	-0.0599398	-0.134837	0.0149578	0.116738	0.73028
Connectivity between ECN and precuneus/ PCC DMN	Leisure-time computer use (group 2)	0.127131	-0.031867	0.28613	0.117064	0.730396
Connectivity between SMN and lateral VN2	Sports club/gym attendance (group 3)	-0.0427159	-0.0962218	0.01079	0.117631	0.730396
Connectivity between left FPN and anterior DMN2	Family and friend visits (group 2)	0.083371	-0.021111	0.187853	0.117812	0.730396
Connectivity between right FPN and anterior DMN2	Pubs/social clubs (group 1)	-0.0663085	-0.149454	0.016837	0.118018	0.730396
Connectivity between CN and AN2	Leisure-time computer use (group 1)	0.159605	-0.0407273	0.359938	0.118386	0.730396
Connectivity between medial VN and lateral VN2	Adult educational classes (group 1)	-0.0686562	-0.154924	0.0176119	0.118781	0.730396
Connectivity between ECN and AN2	Leisure-time computer use (group 1)	0.161186	-0.041357	0.36373	0.118798	0.730396
Volume of caudate	Leisure-time computer use (group 2)	0.105186	-0.0267917	0.237165	0.118249	0.730396
Volume of GM in cingulate gyrus anterior division	Pubs/social clubs (group 1)	0.0580604	-0.0148471	0.130968	0.118545	0.730396
Volume of GM in inferior temporal gyrus posterior division	Pubs/social clubs (group 2)	-0.0564735	-0.12739	0.0144425	0.118552	0.730396
Volume of GM in parahippocampal gyrus anterior division	Adult educational classes (group 3)	0.0721345	-0.0181342	0.162403	0.117278	0.730396
Volume of GM in temporal occipital fusiform cortex	Religious activities (group 3)	-0.0383711	-0.0865802	0.00983801	0.118743	0.730396
Volume of GM in vermis x cerebellum	Family and friend visits (group 1)	-0.0841043	-0.189779	0.0215705	0.118767	0.730396
Weighted mean MD in tract forceps minor	Family and friend visits (group 3)	-0.0618142	-0.139247	0.0156187	0.117652	0.730396
Weighted mean MD in tract inferior frontooccipital fasciculus	Family and friend visits (group 3)	-0.0591519	-0.133291	0.0149876	0.117858	0.730396
Weighted mean MD in tract inferior frontooccipital fasciculus	Family and friend visits (group 2)	-0.0772997	-0.174238	0.0196386	0.118059	0.730396
Volume of GM in parahippocampal gyrus posterior division	Religious activities (group 2)	0.0948461	-0.0245328	0.214225	0.119409	0.73101
Volume of GM in postcentral gyrus	Family and friend visits (group 1)	0.071788	-0.0185621	0.162138	0.119382	0.73101
Volume of GM in ventral striatum	Religious activities (group 1)	0.100954	-0.0259834	0.227892	0.119032	0.73101
Volume of GM in x cerebellum	Sports club/gym attendance (group 2)	-0.0531855	-0.120094	0.0137235	0.119224	0.73101
Connectivity between right FPN and BGN	Family and friend visits (group 1)	-0.0863614	-0.1953	0.0225771	0.120221	0.735199
Connectivity between right FPN and anterior DMN2	Religious activities (group 3)	0.0465079	-0.0121871	0.105203	0.120403	0.735522
Connectivity between SMN and right FPN	Sports club/gym attendance (group 3)	0.0428038	-0.0112746	0.0968823	0.120802	0.737175
Weighted mean MD in tract middle cerebellar peduncle	Pubs/social clubs (group 2)	-0.0645066	-0.146073	0.0170602	0.121117	0.738309
Volume of GM in precentral gyrus	Adult educational classes (group 2)	-0.0604628	-0.136943	0.0160174	0.121246	0.738312
Connectivity between SMN3 and right CON	Religious activities (group 3)	0.0459502	-0.0122031	0.104104	0.12144	0.738592
Connectivity between SMN2 and right CON	Leisure-time computer use (group 2)	-0.126208	-0.28602	0.0336032	0.12164	0.738592
Connectivity between posterior DMN2 and SMN2	Religious activities (group 1)	0.119181	-0.031748	0.27011	0.121679	0.738592
Connectivity between lateral VN and precuneus/ PCC DMN	Leisure-time computer use (group 1)	-0.159981	-0.362953	0.0429912	0.122369	0.741455
Connectivity between lateral VN and CN	Religious activities (group 2)	0.105348	-0.0284171	0.239112	0.122669	0.741455
Volume of accumbens	Leisure-time computer use (group 2)	0.110422	-0.0297458	0.25059	0.122562	0.741455
Volume of GM in middle temporal gyrus anterior division	Sports club/gym attendance (group 2)	-0.0513606	-0.116548	0.0138272	0.122513	0.741455
Connectivity between anterior DMN and CN	Religious activities (group 3)	0.0454842	-0.0123191	0.103288	0.122993	0.741538
Connectivity between left FPN and posterior DMN2	Leisure-time computer use (group 3)	0.111365	-0.0305435	0.253273	0.124002	0.741538
Connectivity between left FPN and lateral VN2	Sports club/gym attendance (group 2)	0.0599735	-0.0164815	0.136429	0.124163	0.741538
Connectivity between SMN and lateral VN2	Adult educational classes (group 1)	-0.0669089	-0.152218	0.0184003	0.12422	0.741538
Connectivity between anterior DMN and lateral VN2	Sports club/gym attendance (group 1)	0.0590675	-0.0162614	0.134396	0.124307	0.741538
Connectivity between SMN3 and AN2	Leisure-time computer use (group 3)	-0.110967	-0.252566	0.0306316	0.124526	0.741538
Connectivity between medial VN and SMN2	Religious activities (group 1)	-0.11855	-0.269844	0.0327437	0.124573	0.741538
Connectivity between posterior DMN2 and anterior DMN2	Pubs/social clubs (group 2)	0.0657186	-0.0183145	0.149752	0.125305	0.741538
Connectivity between precuneus/ PCC DMN and right CON	Sports club/gym attendance (group 1)	-0.0590255	-0.134525	0.0164742	0.12543	0.741538
Connectivity between anterior DMN and lateral VN	Sports club/gym attendance (group 2)	-0.059809	-0.136345	0.016727	0.125598	0.741538
Connectivity between right FPN and CN	Adult educational classes (group 3)	-0.0879048	-0.200434	0.024624	0.125731	0.741538
Connectivity between left FPN and anterior DMN2	Leisure-time computer use (group 1)	0.158093	-0.0443109	0.360497	0.125779	0.741538
Connectivity between right FPN and AN	Leisure-time computer use (group 1)	-0.158114	-0.360765	0.044536	0.126188	0.741538
Connectivity between medial VN and left CON	Adult educational classes (group 3)	-0.0881997	-0.201373	0.0249732	0.126624	0.741538
Connectivity between AN and ECN	Family and friend visits (group 3)	-0.0624469	-0.142598	0.0177043	0.126732	0.741538
Connectivity between lateral VN and AN2	Family and friend visits (group 2)	0.0800295	-0.0227024	0.182761	0.126781	0.741538
Connectivity between SMN2 and AN2	Sports club/gym attendance (group 1)	-0.0584401	-0.133483	0.0166033	0.126909	0.741538
Connectivity between SMN and posterior DMN	Leisure-time computer use (group 2)	-0.12506	-0.285772	0.0356517	0.127196	0.741538
Connectivity between left FPN and posterior DMN2	Sports club/gym attendance (group 1)	0.0583055	-0.016652	0.133263	0.12735	0.741538
Connectivity between SMN2 and precuneus/ PCC DMN	Family and friend visits (group 3)	-0.062186	-0.142151	0.0177791	0.12744	0.741538
Connectivity between medial VN and AN2	Adult educational classes (group 3)	0.0877086	-0.0251093	0.200527	0.127552	0.741538
Connectivity between left CON and anterior DMN2	Leisure-time computer use (group 1)	-0.157528	-0.360174	0.0451181	0.127591	0.741538
Connectivity between medial VN2 and anterior DMN2	Adult educational classes (group 2)	-0.0754835	-0.172619	0.0216521	0.127719	0.741538
Connectivity between anterior DMN2 and precuneus/ PCC DMN	Sports club/gym attendance (group 1)	0.0580959	-0.016769	0.132961	0.128252	0.741538
Connectivity between medial VN2 and CN	Adult educational classes (group 1)	0.0668253	-0.0193882	0.153039	0.128693	0.741538
Connectivity between AN and right CON	Pubs/social clubs (group 1)	0.0645708	-0.0187518	0.147893	0.128774	0.741538
Connectivity between posterior DMN and CN	Pubs/social clubs (group 3)	0.046666	-0.0135975	0.106929	0.129062	0.741538
Connectivity between SMN and lateral VN2	Religious activities (group 3)	0.0449592	-0.0131771	0.103096	0.129569	0.741538
Connectivity between anterior DMN and CN	Sports club/gym attendance (group 2)	0.0581329	-0.0170608	0.133327	0.129684	0.741538
Connectivity between posterior DMN and SMN3	Leisure-time computer use (group 3)	0.110033	-0.0323782	0.252445	0.129915	0.741538
Connectivity between anterior DMN and left CON	Adult educational classes (group 2)	-0.0747845	-0.171624	0.0220545	0.130108	0.741538
Connectivity between right FPN and ECN	Sports club/gym attendance (group 3)	0.0418683	-0.0123555	0.0960922	0.130166	0.741538
Connectivity between left FPN and AN2	Sports club/gym attendance (group 3)	0.0417725	-0.0123493	0.0958943	0.130323	0.741538
Connectivity between anterior DMN and CN	Religious activities (group 1)	0.114593	-0.0338949	0.263081	0.130368	0.741538
Connectivity between AN and SMN3	Family and friend visits (group 1)	0.0830304	-0.024565	0.190626	0.130389	0.741538
Connectivity between anterior DMN and posterior DMN2	Sports club/gym attendance (group 1)	-0.0577301	-0.132548	0.0170874	0.130428	0.741538
Connectivity between left CON and AN2	Leisure-time computer use (group 2)	0.12296	-0.0364178	0.282338	0.130484	0.741538
Connectivity between medial VN and CN	Pubs/social clubs (group 1)	0.0639155	-0.018991	0.146822	0.130766	0.741538
Connectivity between left CON and BGN	Sports club/gym attendance (group 3)	0.041732	-0.0124189	0.0958829	0.130902	0.741538
Connectivity between BGN and right CON	Sports club/gym attendance (group 2)	0.0587276	-0.0174883	0.134943	0.130962	0.741538
Connectivity between CN and ECN	Pubs/social clubs (group 1)	-0.0636865	-0.146363	0.0189896	0.131077	0.741538
Connectivity between medial VN and AN2	Sports club/gym attendance (group 2)	-0.0589513	-0.135481	0.0175786	0.131081	0.741538
Connectivity between SMN2 and BGN	Adult educational classes (group 2)	0.0739624	-0.0220811	0.170006	0.131187	0.741538
Connectivity between lateral VN and SMN3	Religious activities (group 2)	-0.103754	-0.238547	0.0310379	0.131366	0.741538
Connectivity between anterior DMN2 and AN2	Leisure-time computer use (group 2)	0.121845	-0.0365254	0.280216	0.13155	0.741538
Connectivity between left FPN and precuneus/ PCC DMN	Leisure-time computer use (group 3)	0.109323	-0.0329688	0.251614	0.132086	0.741538
Connectivity between right FPN and BGN	Pubs/social clubs (group 2)	0.0641111	-0.0193857	0.147608	0.132325	0.741538
Connectivity between posterior DMN and medial VN2	Sports club/gym attendance (group 1)	-0.0576213	-0.132763	0.0175203	0.132825	0.741538
Connectivity between medial VN2 and AN2	Leisure-time computer use (group 3)	0.109296	-0.033249	0.251841	0.13287	0.741538
Connectivity between ECN and BGN	Religious activities (group 2)	0.103497	-0.031497	0.238491	0.132904	0.741538
Connectivity between anterior DMN and SMN2	Leisure-time computer use (group 2)	-0.122892	-0.283254	0.0374701	0.133076	0.741538
Connectivity between posterior DMN2 and anterior DMN2	Sports club/gym attendance (group 3)	0.041405	-0.0126557	0.0954657	0.133299	0.741538
Connectivity between medial VN2 and anterior DMN2	Religious activities (group 3)	0.0449507	-0.0137471	0.103649	0.13335	0.741538
Connectivity between anterior DMN and right CON	Religious activities (group 1)	-0.115406	-0.266153	0.0353419	0.133473	0.741538
Connectivity between CN and right CON	Sports club/gym attendance (group 1)	0.0575297	-0.0176534	0.132713	0.133656	0.741538
Connectivity between SMN and AN2	Religious activities (group 2)	0.103005	-0.0316657	0.237675	0.133824	0.741538
Connectivity between anterior DMN and AN	Family and friend visits (group 1)	0.0839419	-0.025873	0.193757	0.134063	0.741538
Connectivity between anterior DMN and CN	Pubs/social clubs (group 2)	-0.0631342	-0.145833	0.0195645	0.134558	0.741538
Connectivity between lateral VN and medial VN2	Pubs/social clubs (group 2)	-0.0640416	-0.147953	0.01987	0.13467	0.741538
Connectivity between AN and lateral VN2	Pubs/social clubs (group 3)	-0.0459778	-0.106234	0.0142788	0.134758	0.741538
Connectivity between lateral VN and right FPN	Religious activities (group 3)	-0.0447471	-0.103409	0.0139144	0.134876	0.741538
Connectivity between SMN and precuneus/ PCC DMN	Pubs/social clubs (group 2)	0.0642727	-0.0200011	0.148547	0.134946	0.741538
Connectivity between posterior DMN and SMN3	Sports club/gym attendance (group 2)	0.0581056	-0.0181784	0.13439	0.13544	0.741538
Connectivity between SMN and right CON	Family and friend visits (group 2)	0.079456	-0.024911	0.183823	0.135638	0.741538
Connectivity between medial VN and right CON	Pubs/social clubs (group 1)	0.0635344	-0.0199194	0.146988	0.135639	0.741538
Connectivity between anterior DMN2 and ECN	Leisure-time computer use (group 2)	-0.121395	-0.280903	0.0381124	0.135767	0.741538
Global GM volume	Leisure-time computer use (group 2)	0.0610972	-0.016928	0.139122	0.124829	0.741538
Global GM volume	Religious activities (group 2)	0.0500874	-0.0154942	0.115669	0.134396	0.741538
Global GM volume	Family and friend visits (group 3)	0.0296938	-0.00924672	0.0686343	0.135008	0.741538
Volume of GM in angular gyrus	Adult educational classes (group 3)	0.0766206	-0.0232334	0.176475	0.132577	0.741538
Volume of GM in central opercular cortex	Pubs/social clubs (group 3)	-0.035733	-0.0812182	0.00975212	0.123604	0.741538
Volume of GM in frontal operculum cortex	Religious activities (group 2)	0.0884783	-0.0274418	0.204398	0.134636	0.741538
Volume of GM in iiv cerebellum	Leisure-time computer use (group 3)	0.0992882	-0.0310957	0.229672	0.135539	0.741538
Volume of GM in inferior frontal gyrus pars opercularis	Sports club/gym attendance (group 3)	0.0373316	-0.0115233	0.0861865	0.134197	0.741538
Volume of GM in inferior temporal gyrus temporooccipital part	Family and friend visits (group 1)	0.0718266	-0.021362	0.165015	0.130851	0.741538
Volume of GM in insular cortex	Sports club/gym attendance (group 1)	0.041244	-0.012373	0.0948609	0.131618	0.741538
Volume of GM in intracalcarine cortex	Family and friend visits (group 3)	0.0558391	-0.0163714	0.12805	0.129598	0.741538
Volume of GM in ix cerebellum	Leisure-time computer use (group 1)	-0.147358	-0.338285	0.0435685	0.130332	0.741538
Volume of GM in middle temporal gyrus anterior division	Family and friend visits (group 2)	-0.0692789	-0.158495	0.0199374	0.127997	0.741538
Volume of GM in middle temporal gyrus posterior division	Family and friend visits (group 3)	0.0486836	-0.0147536	0.112121	0.132525	0.741538
Volume of GM in occipital pole	Leisure-time computer use (group 3)	0.0901818	-0.0280942	0.208458	0.135046	0.741538
Volume of GM in planum temporale	Sports club/gym attendance (group 1)	0.0474153	-0.0131604	0.107991	0.124973	0.741538
Volume of GM in superior temporal gyrus anterior division	Leisure-time computer use (group 3)	0.0953609	-0.0268901	0.217612	0.126281	0.741538
Volume of GM in supracalcarine cortex	Family and friend visits (group 1)	0.075218	-0.0207903	0.171226	0.124632	0.741538
Volume of GM in supramarginal gyrus anterior division	Family and friend visits (group 3)	0.0549418	-0.0167775	0.126661	0.133214	0.741538
Volume of GM in supramarginal gyrus posterior division	Family and friend visits (group 1)	0.0758523	-0.0210191	0.172724	0.12484	0.741538
Volume of GM in temporal fusiform cortex posterior division	Pubs/social clubs (group 1)	-0.0500066	-0.115407	0.015394	0.133948	0.741538
Volume of GM in temporal occipital fusiform cortex	Religious activities (group 2)	0.0863635	-0.0241907	0.196918	0.125725	0.741538
Volume of GM in ventral striatum	Religious activities (group 2)	-0.0868592	-0.200177	0.0264587	0.13299	0.741538
Volume of GM in vermis viiia cerebellum	Family and friend visits (group 2)	0.0766023	-0.0216076	0.174812	0.126308	0.741538
Volume of GM in vi cerebellum	Family and friend visits (group 3)	-0.0526079	-0.120611	0.0153955	0.129438	0.741538
Volume of GM in viiia cerebellum	Family and friend visits (group 2)	0.0714569	-0.0216274	0.164541	0.13241	0.741538
Volume of GM in viiia cerebellum	Adult educational classes (group 2)	0.0661665	-0.0203769	0.15271	0.133986	0.741538
Volume of thalamus	Family and friend visits (group 3)	0.0426576	-0.0124571	0.0977723	0.129253	0.741538
Weighted mean FA in tract cingulate gyrus part of cingulum	Adult educational classes (group 1)	-0.0645553	-0.14819	0.0190797	0.1303	0.741538
Weighted mean FA in tract inferior frontooccipital fasciculus	Sports club/gym attendance (group 2)	0.0569988	-0.016822	0.13082	0.130174	0.741538
Weighted mean FA in tract middle cerebellar peduncle	Religious activities (group 2)	-0.10187	-0.233293	0.0295523	0.128682	0.741538
Weighted mean MD in tract cingulate gyrus part of cingulum	Religious activities (group 3)	-0.0437436	-0.10113	0.0136432	0.135154	0.741538
Weighted mean MD in tract forceps major	Adult educational classes (group 2)	0.0754665	-0.0216435	0.172577	0.127705	0.741538
Weighted mean MD in tract inferior longitudinal fasciculus	Religious activities (group 2)	0.0980031	-0.0281564	0.224163	0.127854	0.741538
Weighted mean MD in tract superior longitudinal fasciculus	Sports club/gym attendance (group 1)	0.0553401	-0.0150889	0.125769	0.123527	0.741538
Volume of GM in planum temporale	Adult educational classes (group 2)	-0.0593786	-0.137545	0.0187882	0.1365	0.74483
Volume of GM in inferior temporal gyrus posterior division	Sports club/gym attendance (group 2)	-0.0489585	-0.113461	0.015544	0.136822	0.745874
Connectivity between posterior DMN2 and right CON	Religious activities (group 2)	0.102355	-0.0325927	0.237303	0.1371	0.74622
Connectivity between posterior DMN2 and AN2	Pubs/social clubs (group 3)	-0.0452153	-0.104835	0.0144047	0.137146	0.74622
Connectivity between AN and anterior DMN2	Pubs/social clubs (group 1)	-0.0626984	-0.145473	0.0200759	0.137628	0.747453
Connectivity between anterior DMN2 and right CON	Adult educational classes (group 2)	-0.0727299	-0.168851	0.0233911	0.13805	0.747453
Connectivity between anterior DMN and AN2	Family and friend visits (group 2)	-0.0791985	-0.183893	0.0254963	0.138143	0.747453
Connectivity between posterior DMN2 and AN2	Adult educational classes (group 1)	-0.0644534	-0.149761	0.0208537	0.138626	0.747453
Connectivity between AN and SMN3	Adult educational classes (group 1)	0.0638603	-0.0206787	0.148399	0.138705	0.747453
Connectivity between SMN3 and anterior DMN2	Pubs/social clubs (group 3)	0.0454087	-0.0147479	0.105565	0.138994	0.747453
Connectivity between right FPN and left FPN	Sports club/gym attendance (group 2)	0.0576986	-0.0187483	0.134145	0.13904	0.747453
Connectivity between SMN and posterior DMN2	Sports club/gym attendance (group 3)	0.0408461	-0.0133135	0.0950058	0.13934	0.747453
Connectivity between anterior DMN2 and precuneus/ PCC DMN	Sports club/gym attendance (group 2)	0.057241	-0.0186679	0.13315	0.139396	0.747453
Connectivity between anterior DMN and left FPN	Pubs/social clubs (group 3)	0.0454777	-0.0149229	0.105878	0.139995	0.747453
Connectivity between medial VN and posterior DMN2	Religious activities (group 2)	-0.10093	-0.235052	0.0331914	0.140209	0.747453
Connectivity between lateral VN and SMN3	Leisure-time computer use (group 1)	0.152479	-0.0502299	0.355189	0.140378	0.747453
Connectivity between AN2 and precuneus/ PCC DMN	Religious activities (group 3)	-0.0442019	-0.102988	0.0145838	0.140531	0.747453
Connectivity between lateral VN and AN	Sports club/gym attendance (group 3)	-0.0407165	-0.0948934	0.0134605	0.140727	0.747453
Connectivity between SMN and AN2	Pubs/social clubs (group 3)	-0.045265	-0.1055	0.0149705	0.140768	0.747453
Connectivity between AN and right CON	Family and friend visits (group 1)	0.082544	-0.0273122	0.1924	0.140813	0.747453
Connectivity between SMN and SMN2	Religious activities (group 2)	-0.101345	-0.236329	0.0336385	0.141124	0.747453
Connectivity between AN and BGN	Sports club/gym attendance (group 1)	-0.0564143	-0.1316	0.0187716	0.14137	0.747453
Connectivity between lateral VN and medial VN	Pubs/social clubs (group 1)	0.0622039	-0.0207298	0.145138	0.141522	0.747453
Connectivity between medial VN and CN	Religious activities (group 2)	0.100653	-0.0335536	0.23486	0.141553	0.747453
Connectivity between medial VN2 and posterior DMN2	Adult educational classes (group 2)	0.073005	-0.0243637	0.170374	0.141663	0.747453
Connectivity between left CON and ECN	Adult educational classes (group 1)	0.0646295	-0.0216195	0.150878	0.141898	0.747453
Connectivity between lateral VN and left CON	Pubs/social clubs (group 3)	-0.0448268	-0.10471	0.015056	0.142303	0.747453
Connectivity between anterior DMN2 and BGN	Pubs/social clubs (group 1)	-0.0621935	-0.145293	0.0209062	0.142386	0.747453
Connectivity between right FPN and CN	Religious activities (group 1)	0.11281	-0.0379508	0.263571	0.142465	0.747453
Volume of GM in brainstem	Religious activities (group 2)	0.0913459	-0.0296103	0.212302	0.138807	0.747453
Volume of GM in crus i cerebellum	Sports club/gym attendance (group 3)	0.0354438	-0.0118909	0.0827785	0.142189	0.747453
Volume of GM in iiv cerebellum	Sports club/gym attendance (group 2)	-0.0528354	-0.12268	0.0170097	0.138146	0.747453
Volume of GM in parahippocampal gyrus anterior division	Adult educational classes (group 1)	0.0517915	-0.017289	0.120872	0.141691	0.747453
Volume of GM in planum polare	Religious activities (group 2)	-0.0800018	-0.186269	0.0262652	0.140046	0.747453
Volume of GM in superior frontal gyrus	Pubs/social clubs (group 1)	-0.0517672	-0.120823	0.0172891	0.141738	0.747453
Volume of GM in superior temporal gyrus posterior division	Sports club/gym attendance (group 3)	-0.0336586	-0.0784283	0.0111111	0.140584	0.747453
Volume of GM in supramarginal gyrus anterior division	Religious activities (group 3)	-0.0398565	-0.092542	0.012829	0.138129	0.747453
Volume of GM in temporal pole	Adult educational classes (group 2)	-0.0577683	-0.134633	0.0190963	0.14072	0.747453
Volume of GM in vermis crus i cerebellum	Sports club/gym attendance (group 1)	-0.0565663	-0.131875	0.0187426	0.14095	0.747453
Volume of GM in vi cerebellum	Pubs/social clubs (group 1)	0.0531674	-0.0175219	0.123857	0.14042	0.747453
Volume of hippocampus	Pubs/social clubs (group 1)	0.0551467	-0.0184668	0.12876	0.142003	0.747453
Volume of putamen	Adult educational classes (group 1)	0.0495566	-0.016122	0.115235	0.139156	0.747453
Weighted mean MD in tract parahippocampal part of cingulum	Sports club/gym attendance (group 1)	0.0553122	-0.0182208	0.128845	0.140377	0.747453
Connectivity between anterior DMN and left FPN	Religious activities (group 3)	0.0440241	-0.0148811	0.102929	0.142946	0.749286
Volume of GM in inferior frontal gyrus pars opercularis	Family and friend visits (group 1)	0.0740372	-0.0251308	0.173205	0.143368	0.750812
Connectivity between left CON and CN	Sports club/gym attendance (group 3)	0.0403332	-0.0137636	0.09443	0.14391	0.752337
Connectivity between precuneus/ PCC DMN and right CON	Pubs/social clubs (group 2)	-0.0627993	-0.147031	0.0214328	0.143922	0.752337
Volume of GM in parahippocampal gyrus posterior division	Family and friend visits (group 2)	0.069068	-0.0236154	0.161751	0.144109	0.752627
Connectivity between left FPN and posterior DMN2	Leisure-time computer use (group 2)	0.118783	-0.0406759	0.278242	0.144265	0.752757
Connectivity between AN and right CON	Family and friend visits (group 3)	0.059624	-0.0204597	0.139708	0.144476	0.752809
Connectivity between anterior DMN and lateral VN	Family and friend visits (group 3)	-0.0596288	-0.139731	0.0204737	0.144538	0.752809
Connectivity between lateral VN and medial VN2	Family and friend visits (group 1)	0.0814723	-0.028071	0.191016	0.144895	0.75354
Connectivity between left FPN and right CON	Leisure-time computer use (group 1)	0.149507	-0.0516153	0.350629	0.145102	0.75354
Connectivity between lateral VN and right CON	Pubs/social clubs (group 3)	-0.0447644	-0.104994	0.0154647	0.145171	0.75354
Connectivity between SMN2 and right CON	Adult educational classes (group 2)	0.0720348	-0.0248941	0.168964	0.145205	0.75354
Weighted mean FA in tract acoustic radiation	Family and friend visits (group 2)	0.0761257	-0.0264226	0.178674	0.145656	0.755196
Weighted mean FA in tract cingulate gyrus part of cingulum	Pubs/social clubs (group 2)	-0.0605113	-0.142054	0.0210319	0.145799	0.755253
Volume of GM in vermis vi cerebellum	Leisure-time computer use (group 3)	0.100591	-0.0350463	0.236229	0.146048	0.755857
Weighted mean MD in tract inferior longitudinal fasciculus	Religious activities (group 3)	-0.0407695	-0.0957836	0.0142446	0.146344	0.756707
Connectivity between lateral VN and left FPN	Pubs/social clubs (group 3)	0.0445326	-0.0156182	0.104683	0.146739	0.757089
Connectivity between right FPN and precuneus/ PCC DMN	Sports club/gym attendance (group 3)	0.039968	-0.0140445	0.0939806	0.146943	0.757089
Connectivity between left CON and lateral VN2	Pubs/social clubs (group 2)	-0.0624311	-0.146826	0.0219642	0.147068	0.757089
Connectivity between BGN and lateral VN2	Adult educational classes (group 2)	-0.0720467	-0.169443	0.0253498	0.14708	0.757089
Volume of GM in x cerebellum	Adult educational classes (group 3)	-0.0730153	-0.171657	0.0256265	0.146817	0.757089
Connectivity between CN and right CON	Leisure-time computer use (group 1)	-0.14935	-0.351437	0.0527361	0.147454	0.758307
Connectivity between AN and BGN	Religious activities (group 2)	-0.0992951	-0.233694	0.0351037	0.147581	0.758307
Connectivity between BGN and right CON	Adult educational classes (group 3)	0.0828316	-0.0295122	0.195175	0.148408	0.759085
Connectivity between medial VN2 and CN	Pubs/social clubs (group 2)	0.0619501	-0.0221273	0.146027	0.148673	0.759085
Connectivity between left FPN and BGN	Adult educational classes (group 3)	0.0830937	-0.0297143	0.195902	0.148799	0.759085
Connectivity between right FPN and ECN	Pubs/social clubs (group 2)	-0.0620789	-0.146374	0.0222164	0.148881	0.759085
Connectivity between medial VN and left FPN	Religious activities (group 1)	-0.110797	-0.26146	0.0398653	0.149459	0.759085
Connectivity between medial VN and left FPN	Adult educational classes (group 3)	-0.0826685	-0.195083	0.0297456	0.149463	0.759085
Connectivity between posterior DMN and CN	Religious activities (group 2)	-0.0990889	-0.23385	0.0356719	0.149517	0.759085
Connectivity between left FPN and SMN2	Pubs/social clubs (group 1)	-0.0611158	-0.144284	0.0220524	0.149765	0.759085
Connectivity between left FPN and AN	Sports club/gym attendance (group 3)	-0.039767	-0.0939128	0.0143788	0.149989	0.759085
Connectivity between lateral VN and SMN2	Adult educational classes (group 2)	-0.0711769	-0.168128	0.0257745	0.150151	0.759085
Connectivity between posterior DMN and lateral VN2	Family and friend visits (group 3)	0.0587952	-0.0213175	0.138908	0.150287	0.759085
Connectivity between posterior DMN2 and AN	Religious activities (group 1)	0.1106	-0.0402888	0.261489	0.150796	0.759085
Connectivity between right FPN and BGN	Religious activities (group 3)	-0.0427781	-0.101149	0.0155923	0.150862	0.759085
Connectivity between AN and ECN	Sports club/gym attendance (group 2)	0.0561003	-0.0204798	0.13268	0.15103	0.759085
Connectivity between SMN2 and anterior DMN2	Religious activities (group 2)	0.0986301	-0.036046	0.233306	0.151153	0.759085
Volume of GM in brainstem	Family and friend visits (group 2)	0.0688642	-0.0250492	0.162778	0.150639	0.759085
Volume of GM in brainstem	Family and friend visits (group 3)	0.0525641	-0.0192618	0.12439	0.151446	0.759085
Volume of GM in lingual gyrus	Adult educational classes (group 2)	0.0519288	-0.0184602	0.122318	0.148168	0.759085
Volume of GM in precentral gyrus	Adult educational classes (group 1)	0.0496564	-0.0181568	0.11747	0.151208	0.759085
Volume of GM in superior frontal gyrus	Religious activities (group 2)	0.0821084	-0.0296864	0.193903	0.149981	0.759085
Volume of GM in supramarginal gyrus anterior division	Adult educational classes (group 3)	0.0740135	-0.0269993	0.175026	0.15095	0.759085
Volume of GM in ventral striatum	Leisure-time computer use (group 1)	0.12553	-0.0448262	0.295887	0.148648	0.759085
Volume of GM in vermis viib cerebellum	Religious activities (group 3)	-0.0412153	-0.0973308	0.0149003	0.149973	0.759085
Volume of GM in vermis x cerebellum	Pubs/social clubs (group 3)	-0.0427389	-0.100772	0.0152937	0.148871	0.759085
Global WM volume	Family and friend visits (group 3)	0.0294597	-0.0106261	0.0695455	0.149726	0.759085
Weighted mean FA in tract inferior longitudinal fasciculus	Adult educational classes (group 2)	-0.0683662	-0.161775	0.0250426	0.151403	0.759085
Weighted mean MD in tract corticospinal tract	Family and friend visits (group 2)	-0.0756519	-0.178611	0.0273068	0.149802	0.759085
Weighted mean MD in tract parahippocampal part of cingulum	Adult educational classes (group 1)	0.0619224	-0.0221954	0.14604	0.14905	0.759085
Connectivity between CN and precuneus/ PCC DMN	Religious activities (group 1)	0.107902	-0.0397116	0.255516	0.151921	0.760803
Connectivity between anterior DMN and lateral VN	Pubs/social clubs (group 3)	0.0440606	-0.0162823	0.104403	0.152373	0.761893
Volume of GM in paracingulate gyrus	Adult educational classes (group 1)	0.0506817	-0.018757	0.12012	0.152538	0.761893
Volume of GM in superior temporal gyrus posterior division	Family and friend visits (group 2)	0.063212	-0.0233927	0.149817	0.15253	0.761893
Connectivity between left FPN and SMN3	Leisure-time computer use (group 3)	0.103648	-0.0385177	0.245813	0.152996	0.762313
Connectivity between CN and precuneus/ PCC DMN	Leisure-time computer use (group 2)	0.114327	-0.0425385	0.271192	0.153132	0.762313
Connectivity between left FPN and posterior DMN2	Adult educational classes (group 2)	0.0704489	-0.0262408	0.167139	0.153253	0.762313
Connectivity between SMN2 and right CON	Leisure-time computer use (group 3)	-0.103608	-0.24583	0.0386141	0.153317	0.762313
Connectivity between medial VN2 and lateral VN2	Religious activities (group 3)	-0.0424979	-0.100839	0.0158435	0.153351	0.762313
Connectivity between left FPN and posterior DMN2	Leisure-time computer use (group 1)	0.146675	-0.0548443	0.348193	0.153683	0.762313
Connectivity between medial VN and right FPN	Adult educational classes (group 2)	-0.0708209	-0.16832	0.0266779	0.154515	0.762313
Connectivity between posterior DMN and SMN3	Religious activities (group 1)	0.10941	-0.0412323	0.260053	0.154564	0.762313
Connectivity between SMN and BGN	Adult educational classes (group 1)	0.0622134	-0.0234544	0.147881	0.154606	0.762313
Connectivity between right FPN and posterior DMN2	Pubs/social clubs (group 1)	0.0596782	-0.0225098	0.141866	0.154662	0.762313
Connectivity between medial VN2 and BGN	Religious activities (group 1)	-0.109797	-0.261018	0.0414254	0.154694	0.762313
Connectivity between SMN2 and AN	Adult educational classes (group 1)	0.0622791	-0.0235307	0.148089	0.154854	0.762313
Connectivity between AN and ECN	Religious activities (group 3)	-0.0427361	-0.101619	0.016147	0.154855	0.762313
Connectivity between medial VN and anterior DMN2	Sports club/gym attendance (group 3)	0.0393177	-0.0148702	0.0935056	0.154967	0.762313
Connectivity between lateral VN2 and right CON	Religious activities (group 2)	-0.0977736	-0.232585	0.0370381	0.155149	0.762313
Connectivity between anterior DMN and right FPN	Religious activities (group 2)	-0.0974605	-0.231841	0.0369206	0.155153	0.762313
Volume of GM in crus i cerebellum	Religious activities (group 3)	-0.0374051	-0.0888297	0.0140195	0.153948	0.762313
Volume of GM in vermis ix cerebellum	Pubs/social clubs (group 2)	0.0581722	-0.0218814	0.138226	0.154352	0.762313
Weighted mean MD in tract middle cerebellar peduncle	Sports club/gym attendance (group 3)	-0.0382162	-0.0906952	0.0142628	0.153472	0.762313
Volume of GM in iiv cerebellum	Religious activities (group 2)	0.0892217	-0.0339137	0.212357	0.155536	0.763541
Connectivity between lateral VN and SMN3	Family and friend visits (group 3)	-0.0579238	-0.137962	0.0221147	0.156041	0.764705
Weighted mean FA in tract posterior thalamic radiation	Family and friend visits (group 3)	0.0557572	-0.0212664	0.132781	0.155927	0.764705
Connectivity between anterior DMN and precuneus/ PCC DMN	Adult educational classes (group 3)	0.0795919	-0.0304408	0.189625	0.156242	0.764924
Connectivity between SMN and medial VN	Adult educational classes (group 1)	0.0624728	-0.0239166	0.148862	0.156352	0.764924
Connectivity between SMN and posterior DMN	Family and friend visits (group 2)	0.0757031	-0.0291654	0.180572	0.15708	0.767131
Connectivity between posterior DMN and lateral VN2	Leisure-time computer use (group 3)	-0.102965	-0.245838	0.039908	0.157777	0.767131
Connectivity between posterior DMN and ECN	Sports club/gym attendance (group 3)	-0.0388608	-0.0928552	0.0151335	0.158328	0.767131
Connectivity between medial VN2 and SMN2	Family and friend visits (group 1)	0.0786089	-0.0307879	0.188006	0.158996	0.767131
Connectivity between anterior DMN2 and CN	Sports club/gym attendance (group 3)	-0.0385591	-0.0922441	0.0151259	0.159181	0.767131
Connectivity between medial VN and SMN2	Adult educational classes (group 3)	-0.0810857	-0.19399	0.0318181	0.159218	0.767131
Connectivity between precuneus/ PCC DMN and right CON	Religious activities (group 3)	0.0422848	-0.0165952	0.101165	0.159237	0.767131
Connectivity between left FPN and right CON	Leisure-time computer use (group 3)	0.101689	-0.0399398	0.243318	0.159327	0.767131
Connectivity between medial VN2 and ECN	Pubs/social clubs (group 2)	0.0603477	-0.0237124	0.144408	0.159376	0.767131
Connectivity between left FPN and lateral VN2	Religious activities (group 1)	-0.108403	-0.259405	0.0425987	0.159387	0.767131
Connectivity between anterior DMN and right FPN	Sports club/gym attendance (group 2)	-0.0547142	-0.130966	0.0215377	0.159589	0.767131
Connectivity between medial VN2 and SMN3	Leisure-time computer use (group 1)	-0.145212	-0.347735	0.0573098	0.159895	0.767131
Connectivity between AN and CN	Leisure-time computer use (group 3)	0.101347	-0.0400304	0.242724	0.159992	0.767131
Connectivity between posterior DMN2 and AN	Leisure-time computer use (group 1)	0.145061	-0.0574274	0.347549	0.160261	0.767131
Connectivity between lateral VN and right CON	Sports club/gym attendance (group 2)	-0.0547158	-0.131096	0.0216644	0.160279	0.767131
Connectivity between SMN2 and precuneus/ PCC DMN	Sports club/gym attendance (group 3)	0.0387123	-0.0153477	0.0927723	0.160432	0.767131
Connectivity between posterior DMN2 and left CON	Religious activities (group 2)	-0.0960522	-0.230243	0.0381383	0.160612	0.767131
Connectivity between posterior DMN2 and BGN	Adult educational classes (group 3)	-0.0796963	-0.19105	0.0316577	0.160664	0.767131
Connectivity between medial VN and posterior DMN2	Family and friend visits (group 2)	0.0745069	-0.0296573	0.178671	0.160909	0.767131
Connectivity between AN and right CON	Sports club/gym attendance (group 3)	-0.0387101	-0.0928394	0.0154192	0.160991	0.767131
Connectivity between CN and BGN	Sports club/gym attendance (group 3)	0.0379431	-0.0151184	0.0910045	0.161029	0.767131
Connectivity between right FPN and left FPN	Leisure-time computer use (group 3)	-0.102022	-0.244751	0.0407083	0.161199	0.767131
Connectivity between ECN and BGN	Family and friend visits (group 2)	0.0749009	-0.0299253	0.179727	0.161353	0.767131
Connectivity between SMN and ECN	Religious activities (group 3)	-0.041778	-0.100287	0.0167309	0.161634	0.767131
Connectivity between right FPN and ECN	Religious activities (group 1)	-0.10806	-0.259421	0.0433	0.161704	0.767131
Connectivity between SMN and precuneus/ PCC DMN	Family and friend visits (group 1)	-0.0785695	-0.188629	0.0314902	0.161731	0.767131
Connectivity between anterior DMN and SMN	Pubs/social clubs (group 1)	-0.0592234	-0.142221	0.0237743	0.161923	0.767131
Connectivity between posterior DMN and right CON	Family and friend visits (group 3)	0.0572446	-0.0229842	0.137473	0.161945	0.767131
Connectivity between left FPN and precuneus/ PCC DMN	Pubs/social clubs (group 1)	-0.0591762	-0.142189	0.0238363	0.162332	0.767131
Connectivity between posterior DMN2 and AN2	Religious activities (group 3)	-0.0414233	-0.099559	0.0167124	0.162527	0.767131
Connectivity between left CON and AN2	Sports club/gym attendance (group 3)	0.0382865	-0.0154682	0.0920412	0.162694	0.767131
Connectivity between AN and precuneus/ PCC DMN	Leisure-time computer use (group 3)	0.101499	-0.0411371	0.244135	0.163079	0.767131
Connectivity between medial VN2 and AN2	Adult educational classes (group 2)	0.0691199	-0.0280387	0.166278	0.163186	0.767131
Connectivity between anterior DMN2 and CN	Pubs/social clubs (group 2)	0.0593685	-0.0240843	0.142821	0.163192	0.767131
Connectivity between SMN and AN	Pubs/social clubs (group 1)	-0.0594856	-0.143115	0.0241438	0.163252	0.767131
Connectivity between posterior DMN2 and left CON	Leisure-time computer use (group 2)	-0.113544	-0.273217	0.0461296	0.163371	0.767131
Volume of GM in angular gyrus	Sports club/gym attendance (group 3)	-0.0342165	-0.0821682	0.0137352	0.161919	0.767131
Volume of GM in heschls gyrus includes h1 and h2	Adult educational classes (group 1)	0.0500748	-0.0194149	0.119564	0.157815	0.767131
Volume of GM in inferior temporal gyrus posterior division	Religious activities (group 2)	-0.0810724	-0.194792	0.0326469	0.162298	0.767131
Volume of GM in ix cerebellum	Adult educational classes (group 2)	0.0656151	-0.0260025	0.157233	0.160382	0.767131
Volume of GM in ix cerebellum	Family and friend visits (group 1)	-0.0739946	-0.177393	0.0294043	0.16071	0.767131
Volume of GM in temporal pole	Leisure-time computer use (group 1)	0.113959	-0.0461183	0.274036	0.162898	0.767131
Volume of GM in vermis viiia cerebellum	Pubs/social clubs (group 2)	0.0562859	-0.0226449	0.135217	0.162188	0.767131
Volume of pallidum	Religious activities (group 1)	0.0949461	-0.0381986	0.228091	0.162187	0.767131
Global WM volume	Family and friend visits (group 2)	0.0376028	-0.0148099	0.0900156	0.159652	0.767131
Weighted mean FA in tract cingulate gyrus part of cingulum	Leisure-time computer use (group 1)	-0.139775	-0.336318	0.0567674	0.163329	0.767131
Weighted mean FA in tract superior longitudinal fasciculus	Religious activities (group 2)	-0.0933304	-0.223856	0.0371954	0.161054	0.767131
Weighted mean MD in tract forceps major	Religious activities (group 1)	-0.107955	-0.25872	0.0428095	0.16046	0.767131
Weighted mean MD in tract middle cerebellar peduncle	Leisure-time computer use (group 1)	-0.140645	-0.337203	0.0559124	0.160757	0.767131
Connectivity between posterior DMN2 and SMN2	Sports club/gym attendance (group 3)	0.0384076	-0.0156629	0.0924781	0.16383	0.767645
Connectivity between lateral VN2 and right CON	Pubs/social clubs (group 3)	-0.042797	-0.103084	0.01749	0.16409	0.767645
Connectivity between left FPN and posterior DMN2	Adult educational classes (group 3)	-0.0795179	-0.191546	0.0325103	0.16414	0.767645
Connectivity between anterior DMN and AN2	Sports club/gym attendance (group 3)	-0.0384216	-0.0925529	0.0157097	0.16415	0.767645
Volume of hippocampus	Adult educational classes (group 3)	0.0707276	-0.0289036	0.170359	0.164086	0.767645
Connectivity between anterior DMN and anterior DMN2	Adult educational classes (group 3)	-0.0781557	-0.188364	0.0320522	0.164519	0.768113
Volume of GM in frontal operculum cortex	Family and friend visits (group 1)	0.066961	-0.0274463	0.161368	0.164452	0.768113
Connectivity between lateral VN and SMN2	Leisure-time computer use (group 2)	0.113243	-0.0466727	0.27316	0.165129	0.76829
Connectivity between posterior DMN and AN2	Family and friend visits (group 2)	-0.0739576	-0.178463	0.0305477	0.165398	0.76829
Connectivity between posterior DMN and precuneus/ PCC DMN	Adult educational classes (group 1)	0.0606143	-0.0250553	0.146284	0.165491	0.76829
Connectivity between medial VN and right CON	Sports club/gym attendance (group 1)	0.0534745	-0.0221323	0.129081	0.16565	0.76829
Connectivity between ECN and precuneus/ PCC DMN	Family and friend visits (group 2)	0.0733366	-0.0303671	0.17704	0.165707	0.76829
Connectivity between posterior DMN and BGN	Leisure-time computer use (group 2)	-0.113713	-0.274525	0.0470986	0.16574	0.76829
Connectivity between AN and right CON	Religious activities (group 3)	0.0415914	-0.0172293	0.100412	0.165759	0.76829
Connectivity between SMN2 and AN2	Religious activities (group 3)	0.0413348	-0.0171539	0.0998236	0.165983	0.76829
Connectivity between anterior DMN2 and precuneus/ PCC DMN	Leisure-time computer use (group 3)	0.100129	-0.0415851	0.241843	0.166078	0.76829
Connectivity between left FPN and SMN2	Adult educational classes (group 2)	0.0686108	-0.02854	0.165762	0.166273	0.76829
Connectivity between BGN and precuneus/ PCC DMN	Adult educational classes (group 2)	-0.0687176	-0.166047	0.0286116	0.166391	0.76829
Global GM volume	Family and friend visits (group 2)	0.035991	-0.0149243	0.0869063	0.165884	0.76829
Volume of GM in superior temporal gyrus anterior division	Family and friend visits (group 2)	-0.0633481	-0.152993	0.0262966	0.166017	0.76829
Volume of GM in vermis vi cerebellum	Adult educational classes (group 2)	0.0652623	-0.0271826	0.157707	0.166436	0.76829
Connectivity between SMN and right FPN	Pubs/social clubs (group 2)	-0.0592378	-0.143279	0.0248031	0.167091	0.768799
Connectivity between medial VN and SMN3	Adult educational classes (group 1)	0.0606272	-0.0254613	0.146716	0.167468	0.768799
Connectivity between posterior DMN2 and ECN	Family and friend visits (group 1)	0.0773814	-0.0325053	0.187268	0.167499	0.768799
Connectivity between anterior DMN2 and precuneus/ PCC DMN	Adult educational classes (group 1)	0.0602895	-0.0253488	0.145928	0.167614	0.768799
Connectivity between CN and AN2	Adult educational classes (group 3)	0.0783706	-0.0329666	0.189708	0.167673	0.768799
Connectivity between lateral VN and right CON	Family and friend visits (group 3)	0.0562636	-0.0236912	0.136218	0.167801	0.768799
Connectivity between left FPN and precuneus/ PCC DMN	Religious activities (group 2)	-0.0945342	-0.228913	0.0398444	0.167922	0.768799
Connectivity between SMN2 and ECN	Adult educational classes (group 3)	0.0783854	-0.033079	0.18985	0.168078	0.768799
Connectivity between SMN and left FPN	Sports club/gym attendance (group 3)	-0.0381704	-0.092459	0.0161182	0.168158	0.768799
Volume of GM in cuneal cortex	Sports club/gym attendance (group 1)	-0.0463264	-0.112023	0.0193702	0.166918	0.768799
Volume of GM in superior temporal gyrus anterior division	Pubs/social clubs (group 3)	-0.0363621	-0.0880033	0.015279	0.167535	0.768799
Volume of GM in supracalcarine cortex	Adult educational classes (group 2)	0.0599773	-0.0250906	0.145045	0.166981	0.768799
Connectivity between anterior DMN and posterior DMN	Pubs/social clubs (group 2)	-0.0587715	-0.142444	0.0249007	0.168581	0.769171
Connectivity between posterior DMN2 and SMN2	Adult educational classes (group 3)	0.0791016	-0.0335304	0.191734	0.168642	0.769171
Volume of GM in brainstem	Pubs/social clubs (group 1)	-0.0524793	-0.127203	0.0222442	0.168635	0.769171
Volume of GM in frontal pole	Adult educational classes (group 1)	0.0405215	-0.0172554	0.0982985	0.169224	0.770593
Weighted mean MD in tract uncinate fasciculus	Sports club/gym attendance (group 1)	0.0496519	-0.0211389	0.120443	0.169196	0.770593
Connectivity between medial VN and SMN2	Pubs/social clubs (group 2)	0.0589735	-0.0252855	0.143232	0.170099	0.770635
Connectivity between left FPN and SMN3	Leisure-time computer use (group 2)	0.111752	-0.0479958	0.2715	0.170315	0.770635
Connectivity between left FPN and BGN	Religious activities (group 3)	-0.0411548	-0.100019	0.0177096	0.170564	0.770635
Connectivity between left FPN and AN2	Adult educational classes (group 2)	-0.0680105	-0.165291	0.0292696	0.170579	0.770635
Connectivity between anterior DMN and right FPN	Family and friend visits (group 3)	0.0557961	-0.0240209	0.135613	0.170622	0.770635
Connectivity between medial VN and BGN	Leisure-time computer use (group 1)	-0.141435	-0.343854	0.0609837	0.170821	0.770635
Connectivity between right FPN and lateral VN2	Pubs/social clubs (group 3)	0.0421544	-0.0182587	0.102567	0.171407	0.770635
Connectivity between medial VN2 and left CON	Leisure-time computer use (group 3)	0.0990976	-0.0431834	0.241379	0.172192	0.770635
Connectivity between left FPN and lateral VN2	Religious activities (group 3)	-0.0408835	-0.0996655	0.0178985	0.172798	0.770635
Connectivity between anterior DMN and left FPN	Pubs/social clubs (group 2)	0.0585867	-0.0256608	0.142834	0.172858	0.770635
Connectivity between medial VN and medial VN2	Religious activities (group 1)	-0.104861	-0.255677	0.0459553	0.172934	0.770635
Connectivity between right FPN and right CON	Pubs/social clubs (group 2)	-0.0584316	-0.142475	0.0256118	0.172955	0.770635
Connectivity between SMN3 and CN	Family and friend visits (group 1)	0.0743172	-0.0326396	0.181274	0.173216	0.770635
Connectivity between right FPN and lateral VN2	Adult educational classes (group 1)	0.0600501	-0.0263775	0.146478	0.173235	0.770635
Global GM volume	Sports club/gym attendance (group 2)	-0.0259808	-0.0631814	0.0112198	0.171022	0.770635
Global GM volume	Adult educational classes (group 2)	-0.0328852	-0.0801989	0.0144285	0.173084	0.770635
Volume of GM in cingulate gyrus posterior division	Pubs/social clubs (group 2)	-0.0421392	-0.102369	0.0180907	0.170262	0.770635
Volume of GM in frontal orbital cortex	Family and friend visits (group 3)	0.0417942	-0.0179367	0.101525	0.17022	0.770635
Volume of GM in frontal pole	Leisure-time computer use (group 3)	0.066533	-0.029132	0.162198	0.172817	0.770635
Volume of GM in insular cortex	Sports club/gym attendance (group 2)	0.0378459	-0.0165188	0.0922106	0.172404	0.770635
Volume of GM in middle frontal gyrus	Sports club/gym attendance (group 2)	-0.0432851	-0.105451	0.0188812	0.172323	0.770635
Volume of GM in parahippocampal gyrus anterior division	Pubs/social clubs (group 1)	0.0463612	-0.0203432	0.113066	0.173097	0.770635
Volume of GM in parietal operculum cortex	Leisure-time computer use (group 1)	0.11597	-0.049861	0.281802	0.170453	0.770635
Volume of GM in parietal operculum cortex	Pubs/social clubs (group 2)	0.0479416	-0.0208547	0.116738	0.171964	0.770635
Volume of GM in superior temporal gyrus posterior division	Pubs/social clubs (group 2)	0.0487644	-0.020832	0.118361	0.169631	0.770635
Volume of GM in temporal fusiform cortex posterior division	Leisure-time computer use (group 2)	0.0881064	-0.0378934	0.214106	0.170495	0.770635
Weighted mean FA in tract posterior thalamic radiation	Family and friend visits (group 2)	0.0699672	-0.0307423	0.170677	0.173272	0.770635
Weighted mean MD in tract anterior thalamic radiation	Religious activities (group 2)	0.080822	-0.0354448	0.197089	0.173025	0.770635
Weighted mean MD in tract corticospinal tract	Pubs/social clubs (group 2)	-0.0576618	-0.140396	0.0250729	0.171911	0.770635
Weighted mean MD in tract forceps major	Religious activities (group 2)	-0.0936041	-0.228193	0.0409845	0.172814	0.770635
Volume of GM in v cerebellum	Leisure-time computer use (group 2)	0.0984393	-0.043345	0.240224	0.173553	0.771285
Volume of putamen	Religious activities (group 1)	-0.0797161	-0.194617	0.0351851	0.173868	0.772089
Connectivity between lateral VN and ECN	Leisure-time computer use (group 2)	0.110049	-0.0488099	0.268907	0.174511	0.772924
Volume of GM in cingulate gyrus posterior division	Family and friend visits (group 3)	-0.0397222	-0.0970519	0.0176074	0.174431	0.772924
Volume of GM in inferior frontal gyrus pars opercularis	Family and friend visits (group 2)	0.0654806	-0.0290424	0.160004	0.17451	0.772924
Weighted mean FA in tract inferior longitudinal fasciculus	Sports club/gym attendance (group 3)	-0.0359768	-0.0879208	0.0159672	0.174597	0.772924
Connectivity between medial VN and precuneus/ PCC DMN	Sports club/gym attendance (group 3)	0.0370772	-0.0165091	0.0906634	0.175028	0.774234
Connectivity between anterior DMN and posterior DMN	Family and friend visits (group 2)	-0.0719985	-0.176141	0.0321441	0.175383	0.775208
Connectivity between right FPN and lateral VN2	Pubs/social clubs (group 1)	0.0575678	-0.0258778	0.141013	0.176297	0.775546
Connectivity between AN and left CON	Religious activities (group 2)	-0.0929831	-0.227811	0.0418447	0.176448	0.775546
Connectivity between lateral VN and medial VN2	Family and friend visits (group 3)	0.0550638	-0.0247919	0.134919	0.176512	0.775546
Connectivity between left CON and CN	Adult educational classes (group 2)	-0.0670127	-0.164267	0.0302419	0.176825	0.775546
Connectivity between SMN2 and AN	Leisure-time computer use (group 1)	-0.138912	-0.340576	0.0627527	0.176961	0.775546
Connectivity between CN and BGN	Leisure-time computer use (group 1)	-0.136929	-0.335738	0.0618805	0.177013	0.775546
Connectivity between medial VN and posterior DMN	Adult educational classes (group 2)	-0.066899	-0.164074	0.0302765	0.177208	0.775546
Connectivity between anterior DMN and medial VN	Pubs/social clubs (group 1)	0.0572477	-0.0259373	0.140433	0.177357	0.775546
Volume of GM in inferior temporal gyrus anterior division	Leisure-time computer use (group 2)	0.0983954	-0.0441059	0.240897	0.175919	0.775546
Volume of GM in paracingulate gyrus	Leisure-time computer use (group 1)	0.112659	-0.0505391	0.275857	0.176024	0.775546
Volume of GM in precuneous cortex	Leisure-time computer use (group 1)	0.10442	-0.047302	0.256141	0.177336	0.775546
Weighted mean FA in tract cingulate gyrus part of cingulum	Sports club/gym attendance (group 1)	-0.0503788	-0.123499	0.0227415	0.176862	0.775546
Weighted mean MD in tract acoustic radiation	Adult educational classes (group 1)	-0.0588623	-0.144244	0.0265194	0.1766	0.775546
Weighted mean MD in tract forceps major	Religious activities (group 3)	-0.0404461	-0.0991359	0.0182437	0.176758	0.775546
Connectivity between SMN and left FPN	Sports club/gym attendance (group 1)	-0.0520305	-0.1277	0.0236393	0.177734	0.776135
Connectivity between medial VN2 and posterior DMN2	Family and friend visits (group 2)	0.0719949	-0.0327168	0.176706	0.177763	0.776135
Connectivity between anterior DMN and anterior DMN2	Religious activities (group 1)	-0.101486	-0.249146	0.0461742	0.177927	0.776246
Connectivity between AN and right CON	Adult educational classes (group 3)	0.0774735	-0.0352835	0.190231	0.178059	0.776246
Connectivity between lateral VN and precuneus/ PCC DMN	Pubs/social clubs (group 1)	0.0572104	-0.0261888	0.14061	0.178755	0.777812
Connectivity between medial VN2 and left CON	Adult educational classes (group 1)	0.0589352	-0.0270278	0.144898	0.179005	0.777812
Connectivity between posterior DMN and medial VN2	Leisure-time computer use (group 3)	0.0973682	-0.0448281	0.239565	0.17954	0.777812
Connectivity between SMN and AN2	Sports club/gym attendance (group 3)	-0.0370128	-0.0910712	0.0170455	0.17958	0.777812
Connectivity between right FPN and AN	Family and friend visits (group 1)	-0.0751142	-0.184863	0.0346347	0.179747	0.777812
Connectivity between right FPN and left CON	Religious activities (group 2)	-0.0911355	-0.224336	0.0420649	0.179888	0.777812
Volume of GM in planum temporale	Sports club/gym attendance (group 2)	-0.0421398	-0.10356	0.0192806	0.178689	0.777812
Volume of GM in precentral gyrus	Pubs/social clubs (group 2)	-0.0453252	-0.111452	0.0208016	0.179106	0.777812
Volume of GM in vermis viiib cerebellum	Pubs/social clubs (group 2)	0.0543986	-0.0250373	0.133834	0.179498	0.777812
Volume of GM in vermis viiib cerebellum	Pubs/social clubs (group 3)	-0.0389635	-0.0959144	0.0179875	0.179913	0.777812
Volume of hippocampus	Religious activities (group 1)	-0.0914537	-0.224956	0.0420484	0.179356	0.777812
Connectivity between right FPN and SMN3	Sports club/gym attendance (group 2)	-0.0522166	-0.128627	0.0241935	0.180413	0.779054
Connectivity between AN and lateral VN2	Adult educational classes (group 1)	-0.0589229	-0.145184	0.0273378	0.180601	0.779054
Connectivity between anterior DMN and medial VN2	Family and friend visits (group 1)	0.075112	-0.0348852	0.185109	0.180745	0.779054
Volume of GM in vermis crus ii cerebellum	Sports club/gym attendance (group 3)	-0.0363576	-0.0895896	0.0168745	0.18065	0.779054
Connectivity between SMN and right FPN	Adult educational classes (group 2)	-0.0663193	-0.163536	0.0308969	0.181173	0.780312
Volume of GM in superior parietal lobule	Religious activities (group 1)	-0.092336	-0.2278	0.0431283	0.18153	0.78076
Volume of GM in supramarginal gyrus posterior division	Sports club/gym attendance (group 2)	0.0459858	-0.0214821	0.113454	0.18155	0.78076
Connectivity between CN and BGN	Sports club/gym attendance (group 1)	0.0503487	-0.0236106	0.124308	0.182084	0.781192
Connectivity between medial VN2 and CN	Adult educational classes (group 3)	0.0766733	-0.0359834	0.18933	0.182193	0.781192
Connectivity between anterior DMN and CN	Leisure-time computer use (group 3)	-0.0954975	-0.235846	0.0448511	0.182297	0.781192
Connectivity between SMN and posterior DMN	Sports club/gym attendance (group 3)	-0.0368762	-0.0910886	0.0173361	0.182433	0.781192
Connectivity between left CON and right CON	Religious activities (group 2)	0.0913599	-0.0430639	0.225784	0.182805	0.781192
Connectivity between anterior DMN2 and precuneus/ PCC DMN	Religious activities (group 3)	-0.03966	-0.0980155	0.0186956	0.182814	0.781192
Connectivity between posterior DMN and BGN	Leisure-time computer use (group 1)	-0.138039	-0.341268	0.0651894	0.183069	0.781192
Volume of GM in inferior temporal gyrus temporooccipital part	Adult educational classes (group 1)	-0.0497571	-0.122949	0.0234353	0.182695	0.781192
Volume of GM in occipital fusiform gyrus	Family and friend visits (group 3)	0.045404	-0.0214548	0.112263	0.183152	0.781192
Volume of GM in temporal occipital fusiform cortex	Leisure-time computer use (group 2)	0.0896224	-0.0419577	0.221203	0.181852	0.781192
Weighted mean MD in tract forceps minor	Sports club/gym attendance (group 2)	0.050251	-0.0237325	0.124234	0.183077	0.781192
Connectivity between medial VN and right FPN	Sports club/gym attendance (group 1)	-0.0513005	-0.126882	0.024281	0.183383	0.7812
Connectivity between lateral VN and lateral VN2	Leisure-time computer use (group 2)	0.107734	-0.0510073	0.266476	0.183426	0.7812
Connectivity between SMN and precuneus/ PCC DMN	Religious activities (group 3)	-0.0399694	-0.0988908	0.018952	0.183637	0.781514
Weighted mean FA in tract superior longitudinal fasciculus	Adult educational classes (group 2)	-0.0637911	-0.157982	0.0303995	0.184346	0.783948
Connectivity between posterior DMN and SMN2	Leisure-time computer use (group 2)	-0.108318	-0.268383	0.0517458	0.184694	0.78413
Connectivity between posterior DMN and lateral VN2	Sports club/gym attendance (group 2)	-0.0517633	-0.128273	0.0247467	0.184799	0.78413
Volume of GM in parahippocampal gyrus posterior division	Religious activities (group 1)	-0.0904763	-0.224203	0.0432508	0.184787	0.78413
Connectivity between right FPN and left FPN	Adult educational classes (group 2)	-0.065656	-0.162923	0.0316111	0.185807	0.785877
Connectivity between anterior DMN2 and precuneus/ PCC DMN	Religious activities (group 1)	0.101109	-0.0487975	0.251015	0.18615	0.785877
Connectivity between SMN and BGN	Pubs/social clubs (group 1)	-0.0557735	-0.13849	0.026943	0.186285	0.785877
Connectivity between SMN and right FPN	Leisure-time computer use (group 2)	-0.108095	-0.268421	0.052231	0.18632	0.785877
Connectivity between anterior DMN2 and CN	Religious activities (group 3)	0.0393103	-0.0190039	0.0976244	0.18639	0.785877
Connectivity between lateral VN and posterior DMN2	Pubs/social clubs (group 3)	0.0400145	-0.0194015	0.0994306	0.186815	0.785877
Connectivity between posterior DMN and AN2	Family and friend visits (group 1)	-0.0738255	-0.183466	0.0358154	0.186896	0.785877
Connectivity between ECN and right CON	Sports club/gym attendance (group 3)	-0.0360759	-0.0896542	0.0175024	0.186901	0.785877
Connectivity between medial VN2 and left CON	Religious activities (group 1)	-0.101306	-0.251815	0.0492032	0.18706	0.785877
Connectivity between lateral VN and ECN	Religious activities (group 2)	-0.0897976	-0.223305	0.0437094	0.187376	0.785877
Connectivity between AN2 and lateral VN2	Leisure-time computer use (group 2)	0.107662	-0.052569	0.267892	0.187828	0.785877
Connectivity between posterior DMN2 and CN	Sports club/gym attendance (group 3)	-0.0356622	-0.0887413	0.0174169	0.18786	0.785877
Connectivity between left CON and right CON	Sports club/gym attendance (group 2)	0.0511746	-0.0250959	0.127445	0.188457	0.785877
Connectivity between lateral VN and SMN2	Leisure-time computer use (group 3)	0.0954471	-0.0468677	0.237762	0.188645	0.785877
Connectivity between SMN2 and SMN3	Family and friend visits (group 1)	0.0729611	-0.0358508	0.181773	0.188745	0.785877
Connectivity between anterior DMN and lateral VN	Adult educational classes (group 2)	-0.0652925	-0.16268	0.0320949	0.1888	0.785877
Connectivity between anterior DMN and AN2	Religious activities (group 1)	-0.101261	-0.252355	0.0498324	0.188966	0.785877
Connectivity between anterior DMN2 and precuneus/ PCC DMN	Leisure-time computer use (group 2)	0.106719	-0.0525215	0.26596	0.188975	0.785877
Volume of caudate	Sports club/gym attendance (group 3)	0.0298225	-0.0146846	0.0743296	0.189051	0.785877
Volume of GM in parahippocampal gyrus posterior division	Adult educational classes (group 1)	0.051204	-0.0251598	0.127568	0.188743	0.785877
Volume of GM in v cerebellum	Religious activities (group 2)	0.0801634	-0.0390358	0.199363	0.187435	0.785877
Volume of thalamus	Leisure-time computer use (group 1)	0.093873	-0.0456919	0.233438	0.187372	0.785877
Global WM volume	Adult educational classes (group 2)	0.0328358	-0.0158965	0.081568	0.186594	0.785877
Weighted mean FA in tract medial lemniscus	Sports club/gym attendance (group 3)	-0.0349776	-0.0870898	0.0171346	0.188301	0.785877
Weighted mean FA in tract middle cerebellar peduncle	Adult educational classes (group 3)	-0.0739815	-0.183897	0.0359342	0.187069	0.785877
Weighted mean MD in tract cingulate gyrus part of cingulum	Religious activities (group 1)	-0.0987778	-0.246196	0.04864	0.189055	0.785877
Weighted mean MD in tract inferior frontooccipital fasciculus	Sports club/gym attendance (group 1)	0.0469031	-0.0229596	0.116766	0.188194	0.785877
Weighted mean MD in tract middle cerebellar peduncle	Pubs/social clubs (group 3)	0.0394955	-0.0189832	0.0979742	0.185562	0.785877
Connectivity between SMN3 and lateral VN2	Pubs/social clubs (group 1)	-0.0553636	-0.13806	0.0273331	0.189436	0.786888
Connectivity between medial VN and SMN3	Sports club/gym attendance (group 3)	0.0361374	-0.0178715	0.0901463	0.189685	0.787352
Connectivity between lateral VN and anterior DMN2	Family and friend visits (group 1)	0.0734902	-0.0364195	0.1834	0.189989	0.78737
Connectivity between medial VN and precuneus/ PCC DMN	Sports club/gym attendance (group 1)	0.0499113	-0.0247794	0.124602	0.190256	0.78737
Connectivity between right FPN and medial VN2	Sports club/gym attendance (group 3)	0.0362012	-0.0179751	0.0903775	0.190275	0.78737
Connectivity between posterior DMN and right CON	Family and friend visits (group 2)	0.0700575	-0.0348427	0.174958	0.190515	0.78737
Volume of GM in inferior frontal gyrus pars opercularis	Family and friend visits (group 3)	0.0482947	-0.0239975	0.120587	0.190382	0.78737
Volume of pallidum	Leisure-time computer use (group 3)	0.0841572	-0.0417033	0.210018	0.18998	0.78737
Connectivity between lateral VN and CN	Adult educational classes (group 2)	-0.0644055	-0.160919	0.0321083	0.190867	0.787944
Connectivity between right FPN and CN	Religious activities (group 3)	-0.0391535	-0.0978417	0.0195346	0.190982	0.787944
Connectivity between medial VN and anterior DMN2	Pubs/social clubs (group 1)	-0.0556412	-0.139059	0.0277766	0.191067	0.787944
Connectivity between anterior DMN and lateral VN2	Religious activities (group 1)	0.100513	-0.0503329	0.251359	0.191526	0.788701
Volume of GM in superior temporal gyrus anterior division	Sports club/gym attendance (group 3)	-0.0308822	-0.077229	0.0154646	0.191526	0.788701
Connectivity between SMN2 and ECN	Family and friend visits (group 1)	0.072316	-0.036315	0.180947	0.191943	0.788868
Connectivity between SMN and anterior DMN2	Pubs/social clubs (group 1)	-0.0551292	-0.138075	0.0278167	0.192653	0.788868
Connectivity between SMN3 and left CON	Pubs/social clubs (group 3)	0.0398036	-0.0200934	0.0997007	0.192724	0.788868
Connectivity between posterior DMN and AN	Sports club/gym attendance (group 3)	-0.035922	-0.0900179	0.0181739	0.193053	0.788868
Connectivity between right FPN and AN2	Pubs/social clubs (group 1)	0.0550771	-0.0278703	0.138024	0.193082	0.788868
Volume of GM in inferior frontal gyrus pars opercularis	Adult educational classes (group 2)	-0.0584703	-0.146308	0.0293673	0.19197	0.788868
Volume of GM in planum polare	Religious activities (group 1)	-0.0791071	-0.198146	0.0399321	0.192716	0.788868
Volume of GM in postcentral gyrus	Leisure-time computer use (group 2)	0.0878057	-0.0442375	0.219849	0.192428	0.788868
Volume of GM in supramarginal gyrus posterior division	Leisure-time computer use (group 1)	0.119028	-0.0598524	0.297907	0.192142	0.788868
Weighted mean MD in tract cingulate gyrus part of cingulum	Pubs/social clubs (group 3)	0.0390942	-0.0197736	0.0979619	0.193015	0.788868
Weighted mean MD in tract parahippocampal part of cingulum	Pubs/social clubs (group 3)	-0.039091	-0.0978867	0.0197046	0.192505	0.788868
Connectivity between CN and precuneus/ PCC DMN	Pubs/social clubs (group 3)	0.0391011	-0.0198248	0.0980271	0.193375	0.789501
Connectivity between SMN3 and right CON	Sports club/gym attendance (group 2)	0.0501538	-0.0254655	0.125773	0.193592	0.789821
Connectivity between medial VN and left FPN	Leisure-time computer use (group 2)	0.106054	-0.0539841	0.266092	0.193969	0.79074
Connectivity between left FPN and left CON	Religious activities (group 3)	0.0391021	-0.0199375	0.0981417	0.194223	0.79074
Connectivity between SMN and left CON	Adult educational classes (group 3)	0.0744646	-0.0380912	0.18702	0.19471	0.79074
Connectivity between posterior DMN and BGN	Sports club/gym attendance (group 3)	-0.0358677	-0.090091	0.0183556	0.194777	0.79074
Connectivity between BGN and right CON	Religious activities (group 2)	0.0888733	-0.0454985	0.223245	0.194832	0.79074
Connectivity between AN and right CON	Family and friend visits (group 2)	0.0692179	-0.0354927	0.173928	0.195074	0.79074
Connectivity between medial VN and lateral VN2	Religious activities (group 3)	-0.0388502	-0.0976507	0.0199504	0.195297	0.79074
Connectivity between anterior DMN and left CON	Sports club/gym attendance (group 1)	0.0495725	-0.0255023	0.124647	0.195569	0.79074
Connectivity between medial VN2 and left CON	Adult educational classes (group 2)	0.0639876	-0.0329621	0.160937	0.195772	0.79074
Connectivity between SMN2 and ECN	Adult educational classes (group 1)	-0.056295	-0.141596	0.0290061	0.195807	0.79074
Connectivity between AN and precuneus/ PCC DMN	Adult educational classes (group 1)	0.056892	-0.0293165	0.1431	0.195822	0.79074
Connectivity between left FPN and posterior DMN	Leisure-time computer use (group 3)	-0.0937513	-0.235834	0.0483315	0.195889	0.79074
Volume of GM in central opercular cortex	Family and friend visits (group 2)	0.052153	-0.0267876	0.131094	0.19533	0.79074
Volume of GM in superior frontal gyrus	Family and friend visits (group 1)	0.06024	-0.0307928	0.151273	0.194602	0.79074
Weighted mean MD in tract uncinate fasciculus	Family and friend visits (group 2)	-0.0649874	-0.163215	0.0332396	0.194693	0.79074
Connectivity between right FPN and posterior DMN	Pubs/social clubs (group 2)	-0.055497	-0.139654	0.0286598	0.196152	0.79076
Connectivity between CN and right CON	Pubs/social clubs (group 1)	-0.0547283	-0.137723	0.0282662	0.19617	0.79076
Connectivity between SMN2 and precuneus/ PCC DMN	Adult educational classes (group 3)	0.0741888	-0.038388	0.186766	0.196452	0.790929
Connectivity between anterior DMN and posterior DMN2	Religious activities (group 2)	-0.0881124	-0.221865	0.0456402	0.196611	0.790929
Connectivity between left FPN and CN	Religious activities (group 1)	-0.0990165	-0.249335	0.0513022	0.196653	0.790929
Volume of GM in inferior frontal gyrus pars triangularis	Religious activities (group 2)	0.0812244	-0.0421148	0.204564	0.196765	0.790929
Connectivity between medial VN2 and right CON	Adult educational classes (group 2)	0.0640062	-0.0333902	0.161403	0.1977	0.793198
Connectivity between anterior DMN and posterior DMN2	Religious activities (group 3)	0.0383274	-0.0199978	0.0966526	0.197726	0.793198
Connectivity between SMN and precuneus/ PCC DMN	Sports club/gym attendance (group 3)	-0.0356298	-0.0898616	0.018602	0.197823	0.793198
Connectivity between SMN2 and precuneus/ PCC DMN	Religious activities (group 2)	0.0884574	-0.0462408	0.223156	0.198016	0.793198
Volume of GM in vermis viiia cerebellum	Religious activities (group 2)	0.0830895	-0.0434364	0.209615	0.198022	0.793198
Connectivity between SMN and SMN3	Pubs/social clubs (group 3)	0.0382651	-0.0200233	0.0965534	0.198173	0.793247
Connectivity between left FPN and medial VN2	Adult educational classes (group 3)	-0.0741268	-0.187158	0.0389045	0.198632	0.794067
Connectivity between precuneus/ PCC DMN and right CON	Leisure-time computer use (group 2)	0.105288	-0.0553345	0.26591	0.198844	0.794067
Connectivity between right FPN and CN	Adult educational classes (group 2)	-0.0636506	-0.160772	0.0334712	0.198933	0.794067
Volume of GM in frontal pole	Pubs/social clubs (group 3)	-0.0264786	-0.0668748	0.0139175	0.19886	0.794067
Connectivity between ECN and lateral VN2	Pubs/social clubs (group 1)	0.0539341	-0.0284358	0.136304	0.199337	0.795085
Connectivity between medial VN and left FPN	Leisure-time computer use (group 1)	0.132391	-0.0698589	0.334641	0.199466	0.795085
Volume of GM in vermis x cerebellum	Adult educational classes (group 2)	0.0612176	-0.0324038	0.154839	0.199952	0.796467
Connectivity between posterior DMN and left CON	Leisure-time computer use (group 2)	-0.104048	-0.263354	0.0552586	0.200471	0.797392
Connectivity between lateral VN and SMN3	Family and friend visits (group 1)	-0.071643	-0.181437	0.0381512	0.200891	0.797392
Connectivity between SMN2 and SMN3	Sports club/gym attendance (group 2)	0.0493798	-0.0263486	0.125108	0.201206	0.797392
Connectivity between medial VN and anterior DMN2	Family and friend visits (group 3)	-0.0522278	-0.132411	0.0279554	0.201697	0.797392
Connectivity between left FPN and anterior DMN2	Sports club/gym attendance (group 2)	-0.0497222	-0.12607	0.0266257	0.201764	0.797392
Connectivity between SMN and right CON	Pubs/social clubs (group 1)	-0.0540868	-0.137137	0.028963	0.201765	0.797392
Connectivity between posterior DMN2 and SMN3	Leisure-time computer use (group 2)	0.103942	-0.0556635	0.263548	0.201774	0.797392
Connectivity between posterior DMN2 and AN2	Religious activities (group 1)	-0.0972409	-0.246582	0.0521005	0.201852	0.797392
Connectivity between SMN and posterior DMN2	Family and friend visits (group 2)	0.0682263	-0.0365557	0.173008	0.201856	0.797392
Volume of GM in lateral occipital cortex inferior division	Pubs/social clubs (group 3)	0.0319316	-0.0170073	0.0808706	0.20092	0.797392
Volume of GM in ventral striatum	Sports club/gym attendance (group 3)	0.0296457	-0.0158293	0.0751207	0.201312	0.797392
Weighted mean FA in tract parahippocampal part of cingulum	Leisure-time computer use (group 1)	0.129054	-0.0686942	0.326803	0.200824	0.797392
Connectivity between medial VN2 and AN	Adult educational classes (group 1)	-0.0553599	-0.140477	0.0297568	0.202359	0.798228
Connectivity between right FPN and left CON	Religious activities (group 3)	-0.0377705	-0.0958549	0.0203139	0.20245	0.798228
Weighted mean FA in tract parahippocampal part of cingulum	Religious activities (group 3)	-0.0372884	-0.0946359	0.0200592	0.202486	0.798228
Connectivity between SMN and ECN	Adult educational classes (group 2)	-0.0629067	-0.159721	0.0339074	0.202798	0.798266
Connectivity between posterior DMN2 and anterior DMN2	Sports club/gym attendance (group 1)	0.0489418	-0.0264103	0.124294	0.202978	0.798266
Connectivity between posterior DMN and BGN	Leisure-time computer use (group 3)	-0.0929255	-0.236038	0.0501866	0.203109	0.798266
Connectivity between posterior DMN and ECN	Adult educational classes (group 1)	-0.0558977	-0.142	0.0302047	0.203193	0.798266
Weighted mean FA in tract inferior frontooccipital fasciculus	Pubs/social clubs (group 3)	0.0378008	-0.020412	0.0960136	0.203085	0.798266
Connectivity between ECN and precuneus/ PCC DMN	Family and friend visits (group 3)	0.0514559	-0.0278577	0.13077	0.203496	0.798909
Connectivity between SMN2 and left CON	Leisure-time computer use (group 2)	0.103896	-0.0563052	0.264097	0.203656	0.798992
Weighted mean MD in tract inferior longitudinal fasciculus	Sports club/gym attendance (group 1)	0.0457619	-0.0248285	0.116352	0.203838	0.799157
Connectivity between posterior DMN and AN2	Pubs/social clubs (group 1)	0.0537435	-0.0294182	0.136905	0.205251	0.799409
Connectivity between anterior DMN and medial VN2	Religious activities (group 1)	-0.0977528	-0.249054	0.053548	0.205371	0.799409
Connectivity between medial VN2 and SMN3	Religious activities (group 1)	-0.0974658	-0.248349	0.0534174	0.205451	0.799409
Connectivity between lateral VN2 and precuneus/ PCC DMN	Leisure-time computer use (group 1)	0.130522	-0.0716832	0.332727	0.205785	0.799409
Connectivity between medial VN2 and CN	Religious activities (group 2)	-0.0869641	-0.221737	0.0478089	0.205946	0.799409
Connectivity between lateral VN and SMN3	Sports club/gym attendance (group 1)	-0.0486438	-0.12405	0.0267623	0.206067	0.799409
Connectivity between right FPN and ECN	Adult educational classes (group 1)	0.0557556	-0.0307042	0.142215	0.20622	0.799409
Connectivity between SMN3 and anterior DMN2	Sports club/gym attendance (group 3)	-0.0348043	-0.0887866	0.019178	0.206317	0.799409
Connectivity between left CON and right CON	Religious activities (group 1)	-0.0969628	-0.247543	0.0536175	0.206886	0.799409
Connectivity between SMN3 and BGN	Sports club/gym attendance (group 2)	-0.0484478	-0.1237	0.0268049	0.206975	0.799409
Volume of GM in central opercular cortex	Religious activities (group 1)	-0.0737258	-0.187649	0.0401968	0.204618	0.799409
Volume of GM in inferior frontal gyrus pars triangularis	Sports club/gym attendance (group 1)	0.0444346	-0.0245597	0.113429	0.206812	0.799409
Volume of GM in lateral occipital cortex inferior division	Leisure-time computer use (group 1)	0.106598	-0.0579535	0.27115	0.204162	0.799409
Volume of GM in lateral occipital cortex superior division	Religious activities (group 3)	-0.0296813	-0.0757507	0.0163881	0.206642	0.799409
Volume of GM in middle frontal gyrus	Family and friend visits (group 3)	0.0419626	-0.0231203	0.107046	0.206302	0.799409
Volume of GM in middle temporal gyrus posterior division	Family and friend visits (group 2)	0.0535614	-0.0293835	0.136506	0.205606	0.799409
Volume of GM in occipital pole	Pubs/social clubs (group 3)	-0.0323435	-0.082302	0.017615	0.204443	0.799409
Volume of GM in paracingulate gyrus	Sports club/gym attendance (group 3)	0.0280575	-0.0154937	0.0716088	0.206664	0.799409
Volume of GM in temporal pole	Pubs/social clubs (group 3)	-0.0307107	-0.078345	0.0169236	0.206329	0.799409
Volume of GM in vermis crus ii cerebellum	Leisure-time computer use (group 3)	0.0908363	-0.0496412	0.231314	0.20499	0.799409
Volume of GM in vermis vi cerebellum	Family and friend visits (group 1)	-0.0672945	-0.17162	0.0370314	0.206102	0.799409
Weighted mean MD in tract inferior frontooccipital fasciculus	Adult educational classes (group 3)	0.0672097	-0.0371724	0.171592	0.206919	0.799409
Connectivity between right FPN and posterior DMN	Adult educational classes (group 2)	-0.0626069	-0.159952	0.0347384	0.20744	0.800072
Connectivity between anterior DMN and posterior DMN2	Family and friend visits (group 3)	0.0510247	-0.0283879	0.130437	0.207876	0.800072
Connectivity between posterior DMN2 and SMN2	Leisure-time computer use (group 1)	0.130124	-0.0724205	0.332669	0.207932	0.800072
Connectivity between medial VN and CN	Family and friend visits (group 1)	0.0702175	-0.0390893	0.179524	0.207973	0.800072
Connectivity between right FPN and anterior DMN2	Leisure-time computer use (group 1)	-0.12993	-0.332344	0.0724842	0.208318	0.800072
Connectivity between SMN and ECN	Adult educational classes (group 1)	-0.0550145	-0.140857	0.0308283	0.209046	0.800072
Connectivity between anterior DMN and AN2	Leisure-time computer use (group 3)	0.0915005	-0.0513251	0.234326	0.20921	0.800072
Connectivity between SMN2 and ECN	Pubs/social clubs (group 3)	-0.0381859	-0.0978188	0.0214471	0.209421	0.800072
Connectivity between lateral VN and medial VN	Sports club/gym attendance (group 1)	-0.0479568	-0.12306	0.0271463	0.210705	0.800072
Connectivity between lateral VN and posterior DMN	Religious activities (group 3)	0.0373373	-0.0211608	0.0958353	0.210907	0.800072
Connectivity between SMN3 and AN2	Sports club/gym attendance (group 1)	-0.0477277	-0.122506	0.0270509	0.210915	0.800072
Connectivity between anterior DMN2 and lateral VN2	Leisure-time computer use (group 2)	-0.102417	-0.262895	0.0580611	0.210954	0.800072
Connectivity between SMN and precuneus/ PCC DMN	Family and friend visits (group 2)	-0.0669273	-0.171832	0.0379773	0.211109	0.800072
Volume of GM in central opercular cortex	Religious activities (group 2)	-0.0651026	-0.166802	0.0365968	0.209564	0.800072
Volume of GM in lateral occipital cortex inferior division	Family and friend visits (group 1)	0.0572215	-0.0319042	0.146347	0.208226	0.800072
Volume of GM in parahippocampal gyrus anterior division	Sports club/gym attendance (group 2)	-0.0392745	-0.100523	0.021974	0.208793	0.800072
Volume of GM in planum polare	Adult educational classes (group 2)	-0.0489667	-0.125634	0.0277009	0.210604	0.800072
Volume of GM in precentral gyrus	Pubs/social clubs (group 3)	-0.0304759	-0.077885	0.0169332	0.207662	0.800072
Volume of GM in precuneous cortex	Leisure-time computer use (group 2)	-0.0766441	-0.196699	0.0434112	0.210805	0.800072
Volume of GM in superior temporal gyrus posterior division	Family and friend visits (group 3)	0.0424867	-0.0237494	0.108723	0.208643	0.800072
Volume of GM in supracalcarine cortex	Family and friend visits (group 2)	0.0584806	-0.0330308	0.149992	0.210344	0.800072
Volume of GM in temporal fusiform cortex anterior division	Adult educational classes (group 1)	0.0451325	-0.02553	0.115795	0.210592	0.800072
Volume of GM in temporal pole	Family and friend visits (group 1)	0.0554205	-0.031336	0.142177	0.210521	0.800072
Volume of pallidum	Pubs/social clubs (group 1)	0.0469323	-0.0264448	0.120309	0.209951	0.800072
Weighted mean FA in tract inferior longitudinal fasciculus	Family and friend visits (group 2)	0.0643755	-0.0361028	0.164854	0.209178	0.800072
Weighted mean MD in tract acoustic radiation	Religious activities (group 1)	-0.095329	-0.244781	0.0541235	0.2112	0.800072
Weighted mean MD in tract forceps major	Sports club/gym attendance (group 1)	0.0483542	-0.0269447	0.123653	0.208133	0.800072
Weighted mean MD in tract forceps major	Sports club/gym attendance (group 2)	0.0488044	-0.0275446	0.125153	0.210219	0.800072
Weighted mean MD in tract middle cerebellar peduncle	Sports club/gym attendance (group 2)	-0.0474114	-0.121579	0.0267561	0.210205	0.800072
Connectivity between left FPN and lateral VN2	Adult educational classes (group 1)	0.054978	-0.0312756	0.141232	0.211526	0.800247
Volume of GM in viiia cerebellum	Pubs/social clubs (group 2)	0.0476688	-0.0271044	0.122442	0.211446	0.800247
Connectivity between lateral VN and precuneus/ PCC DMN	Pubs/social clubs (group 3)	0.038461	-0.0219185	0.0988405	0.211821	0.800452
Connectivity between right FPN and BGN	Religious activities (group 2)	-0.0852562	-0.219113	0.0486002	0.211868	0.800452
Connectivity between SMN3 and AN2	Religious activities (group 2)	0.0851508	-0.0485787	0.21888	0.211999	0.800452
Connectivity between medial VN2 and lateral VN2	Family and friend visits (group 3)	0.0505562	-0.0288818	0.129994	0.212226	0.800701
Connectivity between SMN and SMN3	Sports club/gym attendance (group 2)	-0.0470107	-0.120897	0.0268755	0.212345	0.800701
Connectivity between medial VN2 and anterior DMN2	Leisure-time computer use (group 3)	-0.0905577	-0.233094	0.0519783	0.213011	0.801984
Connectivity between medial VN and right FPN	Pubs/social clubs (group 3)	0.0383806	-0.0220527	0.0988139	0.213186	0.801984
Connectivity between SMN and right CON	Adult educational classes (group 2)	0.0616029	-0.0354193	0.158625	0.213296	0.801984
Connectivity between lateral VN and anterior DMN2	Sports club/gym attendance (group 3)	0.0343705	-0.0197723	0.0885133	0.213386	0.801984
Volume of GM in supramarginal gyrus anterior division	Leisure-time computer use (group 2)	0.0913147	-0.0524386	0.235068	0.213093	0.801984
Connectivity between posterior DMN2 and left CON	Pubs/social clubs (group 1)	-0.0525756	-0.135474	0.0303227	0.213815	0.801993
Connectivity between lateral VN and AN2	Adult educational classes (group 2)	0.0605354	-0.0349446	0.156015	0.213964	0.801993
Connectivity between right FPN and SMN2	Leisure-time computer use (group 1)	-0.128453	-0.331064	0.0741573	0.213979	0.801993
Connectivity between left CON and precuneus/ PCC DMN	Leisure-time computer use (group 3)	-0.0900489	-0.232144	0.0520457	0.214171	0.801993
Connectivity between left CON and BGN	Adult educational classes (group 2)	-0.0617008	-0.159089	0.0356869	0.214291	0.801993
Connectivity between lateral VN and precuneus/ PCC DMN	Pubs/social clubs (group 2)	0.0533317	-0.0308864	0.13755	0.214509	0.801993
Volume of GM in lateral occipital cortex superior division	Family and friend visits (group 3)	0.0397781	-0.0229609	0.102517	0.213954	0.801993
Volume of GM in temporal occipital fusiform cortex	Leisure-time computer use (group 3)	0.0741546	-0.042943	0.191252	0.214499	0.801993
Volume of GM in vermis ix cerebellum	Leisure-time computer use (group 1)	-0.122185	-0.315197	0.070828	0.214667	0.802058
Connectivity between medial VN2 and CN	Sports club/gym attendance (group 2)	0.0483685	-0.0280771	0.124814	0.214899	0.802403
Connectivity between posterior DMN2 and SMN3	Adult educational classes (group 1)	0.05415	-0.0316688	0.139969	0.216161	0.804249
Connectivity between lateral VN and posterior DMN2	Family and friend visits (group 1)	-0.068258	-0.176447	0.0399312	0.216211	0.804249
Connectivity between BGN and right CON	Family and friend visits (group 2)	-0.065808	-0.170116	0.0385005	0.216222	0.804249
Connectivity between left FPN and CN	Adult educational classes (group 1)	-0.0541524	-0.139989	0.0316843	0.216237	0.804249
Volume of amygdala	Family and friend visits (group 1)	-0.0640634	-0.165556	0.0374289	0.215992	0.804249
Volume of GM in cingulate gyrus anterior division	Adult educational classes (group 2)	-0.0537348	-0.138903	0.0314331	0.2162	0.804249
Connectivity between right FPN and medial VN2	Pubs/social clubs (group 3)	0.0380503	-0.0223222	0.0984228	0.216687	0.805183
Connectivity between SMN2 and ECN	Pubs/social clubs (group 2)	0.0524018	-0.030775	0.135579	0.216872	0.805183
Connectivity between SMN2 and precuneus/ PCC DMN	Pubs/social clubs (group 1)	0.0524158	-0.03079	0.135622	0.21691	0.805183
Connectivity between medial VN2 and lateral VN2	Pubs/social clubs (group 2)	-0.0525481	-0.136012	0.0309164	0.217178	0.805655
Volume of GM in lateral occipital cortex inferior division	Pubs/social clubs (group 2)	0.0428897	-0.025371	0.11115	0.218103	0.808562
Connectivity between SMN and AN2	Religious activities (group 1)	-0.0947338	-0.24559	0.0561229	0.218359	0.808989
Connectivity between SMN and SMN3	Adult educational classes (group 1)	-0.0523343	-0.135706	0.0310378	0.218544	0.80915
Connectivity between right FPN and BGN	Family and friend visits (group 3)	-0.0498203	-0.129235	0.0295945	0.218821	0.809577
Weighted mean MD in tract posterior thalamic radiation	Religious activities (group 1)	-0.0852594	-0.221201	0.050682	0.218942	0.809577
Volume of GM in vermis ix cerebellum	Pubs/social clubs (group 3)	-0.0359812	-0.093375	0.0214126	0.219133	0.809758
Connectivity between posterior DMN and ECN	Family and friend visits (group 3)	0.0500194	-0.0298677	0.129907	0.219716	0.811388
Connectivity between anterior DMN and BGN	Pubs/social clubs (group 3)	-0.0376093	-0.0977035	0.0224849	0.219927	0.811645
Connectivity between SMN2 and anterior DMN2	Family and friend visits (group 2)	0.0653253	-0.0391796	0.16983	0.220477	0.812413
Connectivity between SMN3 and lateral VN2	Religious activities (group 2)	0.0836137	-0.0502414	0.217469	0.220798	0.812413
Connectivity between SMN and medial VN2	Adult educational classes (group 3)	-0.0702884	-0.182823	0.0422459	0.220845	0.812413
Volume of GM in subcallosal cortex	Adult educational classes (group 1)	0.0386319	-0.023176	0.10044	0.220523	0.812413
Weighted mean FA in tract acoustic radiation	Adult educational classes (group 2)	-0.0595518	-0.154875	0.0357718	0.220743	0.812413
Connectivity between anterior DMN and AN2	Family and friend visits (group 3)	-0.0499955	-0.130067	0.0300761	0.221	0.812464
Connectivity between medial VN2 and left CON	Leisure-time computer use (group 2)	0.0996824	-0.0601957	0.259561	0.221663	0.813314
Connectivity between SMN and anterior DMN2	Family and friend visits (group 3)	0.049715	-0.0300354	0.129465	0.221743	0.813314
Connectivity between lateral VN and anterior DMN2	Leisure-time computer use (group 1)	-0.126474	-0.329383	0.0764347	0.2218	0.813314
Volume of GM in cingulate gyrus posterior division	Family and friend visits (group 2)	-0.046735	-0.121694	0.0282244	0.221677	0.813314
Connectivity between BGN and lateral VN2	Adult educational classes (group 3)	0.0702531	-0.042594	0.1831	0.222359	0.813847
Connectivity between CN and AN2	Adult educational classes (group 1)	0.0529371	-0.0322667	0.138141	0.22329	0.813847
Connectivity between CN and AN2	Pubs/social clubs (group 1)	-0.0511348	-0.133438	0.0311687	0.223293	0.813847
Connectivity between lateral VN2 and precuneus/ PCC DMN	Pubs/social clubs (group 3)	-0.0373617	-0.0975171	0.0227936	0.223448	0.813847
Connectivity between right FPN and anterior DMN2	Pubs/social clubs (group 3)	-0.0373705	-0.0975663	0.0228254	0.223652	0.813847
Volume of GM in iiv cerebellum	Sports club/gym attendance (group 1)	-0.0428446	-0.111729	0.0260399	0.222786	0.813847
Volume of GM in inferior frontal gyrus pars triangularis	Sports club/gym attendance (group 3)	0.03077	-0.0187294	0.0802694	0.223049	0.813847
Volume of GM in vermis viiia cerebellum	Adult educational classes (group 3)	0.0657097	-0.0401123	0.171532	0.223554	0.813847
Volume of hippocampus	Family and friend visits (group 3)	0.0440408	-0.0267265	0.114808	0.222521	0.813847
Weighted mean FA in tract forceps minor	Family and friend visits (group 2)	0.0621501	-0.0376597	0.16196	0.22226	0.813847
Weighted mean FA in tract inferior frontooccipital fasciculus	Family and friend visits (group 1)	0.0658394	-0.0401542	0.171833	0.223391	0.813847
Weighted mean FA in tract middle cerebellar peduncle	Religious activities (group 1)	0.0915464	-0.0556719	0.238765	0.222887	0.813847
Connectivity between AN2 and BGN	Religious activities (group 3)	0.0363471	-0.0222289	0.094923	0.223878	0.814153
Connectivity between right FPN and right CON	Leisure-time computer use (group 3)	0.0884815	-0.0541982	0.231161	0.224155	0.814305
Connectivity between right FPN and posterior DMN	Adult educational classes (group 3)	-0.0698858	-0.182674	0.042902	0.224542	0.814305
Connectivity between anterior DMN2 and right CON	Family and friend visits (group 2)	-0.0640434	-0.167418	0.0393312	0.224613	0.814305
Connectivity between medial VN and AN	Religious activities (group 1)	0.093781	-0.0576357	0.245198	0.224741	0.814305
Connectivity between anterior DMN and precuneus/ PCC DMN	Pubs/social clubs (group 2)	-0.0508328	-0.132912	0.0312465	0.224773	0.814305
Weighted mean MD in tract forceps minor	Pubs/social clubs (group 1)	0.0499427	-0.0306383	0.130524	0.224423	0.814305
Connectivity between right FPN and posterior DMN	Pubs/social clubs (group 1)	-0.0515966	-0.134935	0.0317419	0.224917	0.814312
Connectivity between left FPN and posterior DMN	Pubs/social clubs (group 2)	0.0518116	-0.0319017	0.135525	0.22507	0.814349
Connectivity between medial VN and AN	Adult educational classes (group 3)	0.0698819	-0.0431218	0.182886	0.225455	0.815227
Volume of GM in supracalcarine cortex	Family and friend visits (group 3)	0.0432449	-0.0267439	0.113234	0.225846	0.816124
Connectivity between posterior DMN and CN	Adult educational classes (group 3)	0.0694951	-0.0431567	0.182147	0.226583	0.817118
Connectivity between posterior DMN and SMN3	Leisure-time computer use (group 1)	0.124644	-0.0775899	0.326877	0.22701	0.817118
Connectivity between medial VN and CN	Family and friend visits (group 2)	0.064211	-0.039976	0.168398	0.227033	0.817118
Connectivity between right FPN and SMN2	Adult educational classes (group 2)	0.0599234	-0.0373113	0.157158	0.227055	0.817118
Connectivity between anterior DMN and BGN	Sports club/gym attendance (group 1)	0.0463152	-0.0288542	0.121485	0.227155	0.817118
Connectivity between posterior DMN and SMN2	Sports club/gym attendance (group 3)	0.0332053	-0.0207724	0.087183	0.227892	0.817118
Connectivity between AN and lateral VN2	Adult educational classes (group 3)	-0.0693224	-0.182041	0.043396	0.228015	0.817118
Connectivity between left FPN and CN	Sports club/gym attendance (group 3)	0.0331171	-0.0207361	0.0869703	0.228055	0.817118
Connectivity between left CON and CN	Religious activities (group 2)	0.0828332	-0.0519566	0.217623	0.228369	0.817118
Connectivity between precuneus/ PCC DMN and right CON	Leisure-time computer use (group 3)	0.0877903	-0.0551529	0.230733	0.228653	0.817118
Connectivity between SMN and ECN	Sports club/gym attendance (group 3)	0.0330348	-0.0208199	0.0868894	0.229226	0.817118
Connectivity between SMN3 and anterior DMN2	Leisure-time computer use (group 2)	-0.0981089	-0.258064	0.0618467	0.229268	0.817118
Connectivity between posterior DMN and left CON	Family and friend visits (group 2)	-0.063675	-0.167606	0.0402557	0.229787	0.817118
Connectivity between SMN3 and CN	Sports club/gym attendance (group 2)	0.0455154	-0.0288723	0.119903	0.230396	0.817118
Connectivity between SMN3 and precuneus/ PCC DMN	Adult educational classes (group 1)	0.0525743	-0.0333992	0.138548	0.230662	0.817118
Connectivity between anterior DMN and AN	Religious activities (group 1)	0.0923702	-0.0587258	0.243466	0.230802	0.817118
Connectivity between medial VN and posterior DMN2	Pubs/social clubs (group 1)	0.050648	-0.03224	0.133536	0.231026	0.817118
Connectivity between SMN and right CON	Pubs/social clubs (group 2)	-0.0512265	-0.135092	0.0326388	0.231196	0.817118
Connectivity between anterior DMN2 and ECN	Adult educational classes (group 2)	0.0591022	-0.0376594	0.155864	0.231208	0.817118
Connectivity between SMN3 and left CON	Leisure-time computer use (group 2)	0.0972696	-0.0620774	0.256617	0.231496	0.817118
Connectivity between SMN and right FPN	Family and friend visits (group 3)	0.0488172	-0.0311783	0.128813	0.231631	0.817118
Connectivity between lateral VN and BGN	Pubs/social clubs (group 3)	-0.0368625	-0.0972743	0.0235493	0.231679	0.817118
Connectivity between SMN and SMN3	Religious activities (group 1)	-0.0890805	-0.235072	0.0569113	0.231688	0.817118
Volume of GM in angular gyrus	Leisure-time computer use (group 1)	0.109717	-0.0699419	0.289376	0.23129	0.817118
Volume of GM in frontal medial cortex	Adult educational classes (group 1)	0.0479692	-0.0300911	0.126029	0.228386	0.817118
Volume of GM in inferior frontal gyrus pars opercularis	Adult educational classes (group 1)	0.0480725	-0.0298111	0.125956	0.226333	0.817118
Volume of GM in inferior frontal gyrus pars opercularis	Religious activities (group 1)	0.0836332	-0.052777	0.220043	0.229458	0.817118
Volume of GM in postcentral gyrus	Leisure-time computer use (group 3)	0.0723063	-0.0452035	0.189816	0.227776	0.817118
Volume of GM in postcentral gyrus	Adult educational classes (group 2)	-0.0491131	-0.129189	0.0309627	0.229282	0.817118
Volume of GM in supramarginal gyrus posterior division	Sports club/gym attendance (group 1)	0.0407581	-0.0257819	0.107298	0.229887	0.817118
Volume of GM in temporal occipital fusiform cortex	Sports club/gym attendance (group 1)	0.0377576	-0.0241019	0.0996171	0.231533	0.817118
Volume of GM in vermis crus ii cerebellum	Family and friend visits (group 2)	0.0632015	-0.0397748	0.166178	0.228966	0.817118
Volume of GM in vermis crus ii cerebellum	Religious activities (group 3)	-0.0353013	-0.0931394	0.0225367	0.231556	0.817118
Volume of GM in vermis ix cerebellum	Religious activities (group 3)	-0.0342153	-0.0901863	0.0217556	0.230825	0.817118
Volume of GM in vi cerebellum	Sports club/gym attendance (group 2)	-0.0396534	-0.104634	0.0253273	0.231643	0.817118
Weighted mean FA in tract medial lemniscus	Family and friend visits (group 3)	-0.0473968	-0.124479	0.0296854	0.228105	0.817118
Weighted mean FA in tract uncinate fasciculus	Leisure-time computer use (group 1)	0.117665	-0.0750111	0.310341	0.231296	0.817118
Weighted mean MD in tract forceps major	Pubs/social clubs (group 1)	-0.0508015	-0.133923	0.0323197	0.230925	0.817118
Weighted mean MD in tract superior thalamic radiation	Religious activities (group 1)	-0.0852472	-0.22485	0.0543554	0.231331	0.817118
Connectivity between right FPN and left FPN	Pubs/social clubs (group 2)	0.0512708	-0.0328075	0.135349	0.231976	0.81763
Connectivity between posterior DMN and SMN2	Adult educational classes (group 2)	-0.0591532	-0.156225	0.0379187	0.2323	0.817765
Volume of GM in temporal pole	Sports club/gym attendance (group 3)	0.0260494	-0.0166964	0.0687952	0.232278	0.817765
Connectivity between BGN and lateral VN2	Religious activities (group 3)	0.0358255	-0.0230309	0.094682	0.232823	0.818131
Connectivity between medial VN2 and lateral VN2	Sports club/gym attendance (group 1)	0.0455364	-0.0292824	0.120355	0.232878	0.818131
Connectivity between AN2 and precuneus/ PCC DMN	Family and friend visits (group 1)	-0.0668132	-0.176611	0.0429848	0.232964	0.818131
Connectivity between left FPN and SMN2	Family and friend visits (group 2)	-0.063588	-0.168104	0.0409275	0.233043	0.818131
Connectivity between anterior DMN2 and BGN	Pubs/social clubs (group 3)	-0.0365975	-0.0967601	0.0235652	0.233119	0.818131
Connectivity between CN and ECN	Family and friend visits (group 3)	0.0482445	-0.031171	0.12766	0.233744	0.819149
Connectivity between posterior DMN2 and BGN	Family and friend visits (group 2)	0.0628043	-0.0405915	0.1662	0.233805	0.819149
Volume of GM in precentral gyrus	Sports club/gym attendance (group 2)	-0.0365141	-0.0966487	0.0236204	0.233965	0.819149
Weighted mean MD in tract parahippocampal part of cingulum	Pubs/social clubs (group 2)	-0.0497948	-0.131804	0.0322142	0.233981	0.819149
Connectivity between lateral VN and CN	Adult educational classes (group 3)	0.0678713	-0.0439531	0.179696	0.234167	0.8193
Connectivity between medial VN2 and ECN	Leisure-time computer use (group 2)	-0.0972184	-0.257573	0.0631358	0.234686	0.819835
Connectivity between SMN and right FPN	Adult educational classes (group 1)	-0.0522574	-0.138457	0.0339419	0.234712	0.819835
Connectivity between right FPN and anterior DMN2	Leisure-time computer use (group 3)	-0.0863902	-0.228929	0.0561484	0.234833	0.819835
Connectivity between CN and BGN	Religious activities (group 3)	-0.0349293	-0.0925911	0.0227325	0.235081	0.819835
Connectivity between anterior DMN2 and precuneus/ PCC DMN	Religious activities (group 2)	0.0810348	-0.0527873	0.214857	0.235251	0.819835
Connectivity between left FPN and posterior DMN	Sports club/gym attendance (group 1)	0.0454571	-0.0296125	0.120527	0.235258	0.819835
Connectivity between anterior DMN2 and right CON	Leisure-time computer use (group 3)	-0.0853928	-0.226462	0.0556769	0.23542	0.819835
Connectivity between SMN2 and SMN3	Religious activities (group 1)	0.0905786	-0.059073	0.24023	0.235466	0.819835
Connectivity between lateral VN and ECN	Leisure-time computer use (group 3)	0.0854661	-0.0559075	0.22684	0.236025	0.821282
Connectivity between BGN and right CON	Pubs/social clubs (group 3)	-0.0363003	-0.0963974	0.0237969	0.236425	0.821726
Connectivity between right FPN and ECN	Religious activities (group 3)	0.035589	-0.0233326	0.0945106	0.23644	0.821726
Volume of GM in heschls gyrus includes h1 and h2	Pubs/social clubs (group 2)	0.0409115	-0.0268502	0.108673	0.236635	0.821903
Connectivity between CN and BGN	Family and friend visits (group 1)	0.0649556	-0.0427202	0.172631	0.237026	0.822264
Volume of GM in viiib cerebellum	Religious activities (group 1)	-0.0828062	-0.220071	0.0544582	0.237019	0.822264
Connectivity between right FPN and lateral VN2	Religious activities (group 1)	-0.0912026	-0.242511	0.0601056	0.237408	0.822592
Volume of GM in inferior temporal gyrus posterior division	Religious activities (group 3)	-0.0298987	-0.079488	0.0196906	0.23728	0.822592
Connectivity between posterior DMN and medial VN2	Adult educational classes (group 1)	0.051751	-0.0342176	0.13772	0.23802	0.82334
Connectivity between lateral VN and SMN	Adult educational classes (group 1)	-0.0520467	-0.138521	0.034428	0.2381	0.82334
Connectivity between anterior DMN2 and precuneus/ PCC DMN	Adult educational classes (group 2)	0.0581186	-0.0384648	0.154702	0.238199	0.82334
Volume of GM in central opercular cortex	Adult educational classes (group 3)	0.0511452	-0.0338312	0.136121	0.238097	0.82334
Volume of GM in ix cerebellum	Adult educational classes (group 3)	0.0638443	-0.0423072	0.169996	0.238433	0.823652
Connectivity between right FPN and AN2	Adult educational classes (group 2)	0.0582526	-0.0386823	0.155188	0.238823	0.824164
Connectivity between medial VN2 and ECN	Sports club/gym attendance (group 2)	-0.0459312	-0.122379	0.0305163	0.238921	0.824164
Connectivity between left CON and anterior DMN2	Adult educational classes (group 2)	-0.0582994	-0.155538	0.0389389	0.239914	0.824164
Connectivity between AN2 and BGN	Adult educational classes (group 3)	-0.0673227	-0.179645	0.0449997	0.240057	0.824164
Connectivity between AN2 and lateral VN2	Leisure-time computer use (group 3)	0.0854547	-0.0571401	0.22805	0.240125	0.824164
Connectivity between posterior DMN and SMN3	Religious activities (group 2)	-0.0805751	-0.215055	0.0539044	0.240219	0.824164
Connectivity between medial VN2 and precuneus/ PCC DMN	Adult educational classes (group 1)	0.051718	-0.0346639	0.1381	0.240572	0.824164
Connectivity between posterior DMN2 and SMN3	Leisure-time computer use (group 3)	0.0850331	-0.0570055	0.227072	0.240612	0.824164
Connectivity between posterior DMN2 and SMN2	Family and friend visits (group 2)	0.0625958	-0.0419921	0.167184	0.24074	0.824164
Connectivity between AN2 and lateral VN2	Religious activities (group 2)	0.0805732	-0.0540907	0.215237	0.240875	0.824164
Connectivity between lateral VN and CN	Adult educational classes (group 1)	-0.0511659	-0.136742	0.0344106	0.241214	0.824164
Volume of GM in central opercular cortex	Pubs/social clubs (group 1)	-0.0376865	-0.100513	0.0251398	0.239679	0.824164
Volume of GM in inferior frontal gyrus pars triangularis	Adult educational classes (group 2)	-0.0532291	-0.142231	0.0357733	0.241083	0.824164
Volume of GM in intracalcarine cortex	Sports club/gym attendance (group 2)	-0.0412382	-0.110235	0.0277587	0.241383	0.824164
Volume of GM in paracingulate gyrus	Pubs/social clubs (group 1)	-0.0401494	-0.107195	0.026896	0.240473	0.824164
Volume of GM in parahippocampal gyrus anterior division	Leisure-time computer use (group 3)	0.0682929	-0.0460239	0.18261	0.241605	0.824164
Volume of GM in planum polare	Sports club/gym attendance (group 1)	-0.0355119	-0.0949411	0.0239173	0.241487	0.824164
Volume of GM in superior frontal gyrus	Leisure-time computer use (group 1)	0.100919	-0.067177	0.269015	0.239277	0.824164
Volume of GM in vermis x cerebellum	Sports club/gym attendance (group 3)	0.0311838	-0.020896	0.0832637	0.240528	0.824164
Weighted mean MD in tract corticospinal tract	Pubs/social clubs (group 3)	0.0354639	-0.0238521	0.0947799	0.241226	0.824164
Weighted mean MD in tract forceps major	Family and friend visits (group 3)	-0.047894	-0.127796	0.032008	0.240026	0.824164
Volume of GM in juxtapositional lobule cortex formerly supplementary motor cortex	Adult educational classes (group 3)	-0.0606966	-0.162357	0.0409637	0.241878	0.824374
Volume of GM in lateral occipital cortex inferior division	Adult educational classes (group 2)	0.0471261	-0.0318178	0.12607	0.241955	0.824374
Connectivity between posterior DMN2 and CN	Adult educational classes (group 1)	0.0504629	-0.034174	0.1351	0.24253	0.825107
Connectivity between posterior DMN and medial VN2	Leisure-time computer use (group 1)	-0.120377	-0.322305	0.0815511	0.242601	0.825107
Connectivity between right FPN and SMN2	Sports club/gym attendance (group 1)	-0.0449486	-0.120356	0.0304583	0.242646	0.825107
Connectivity between left FPN and medial VN2	Religious activities (group 2)	-0.0804611	-0.215615	0.0546926	0.24324	0.825107
Connectivity between left FPN and CN	Family and friend visits (group 1)	0.0649922	-0.0442839	0.174268	0.243697	0.825107
Connectivity between SMN and right CON	Pubs/social clubs (group 3)	-0.0357426	-0.0958692	0.0243839	0.243932	0.825107
Connectivity between lateral VN and right CON	Sports club/gym attendance (group 3)	-0.0321128	-0.0861575	0.0219318	0.244143	0.825107
Connectivity between anterior DMN2 and right CON	Religious activities (group 2)	-0.0791466	-0.212384	0.0540904	0.244272	0.825107
Connectivity between right FPN and AN	Religious activities (group 1)	0.0896788	-0.0612969	0.240654	0.244298	0.825107
Connectivity between BGN and right CON	Pubs/social clubs (group 2)	-0.0497611	-0.133585	0.0340632	0.244583	0.825107
Connectivity between AN and SMN3	Religious activities (group 2)	0.0784263	-0.0537009	0.210553	0.244639	0.825107
Connectivity between lateral VN and SMN	Adult educational classes (group 3)	0.0670503	-0.0459477	0.180048	0.24479	0.825107
Connectivity between medial VN and posterior DMN2	Pubs/social clubs (group 3)	0.0355732	-0.0244362	0.0955827	0.245253	0.825107
Connectivity between SMN and posterior DMN	Pubs/social clubs (group 1)	0.0494654	-0.0339932	0.132924	0.245333	0.825107
Connectivity between anterior DMN and SMN2	Sports club/gym attendance (group 3)	-0.032045	-0.0861332	0.0220432	0.245521	0.825107
Connectivity between medial VN2 and ECN	Pubs/social clubs (group 1)	0.0493038	-0.0339389	0.132547	0.245654	0.825107
Connectivity between medial VN2 and precuneus/ PCC DMN	Pubs/social clubs (group 1)	-0.0493923	-0.1328	0.0340153	0.245743	0.825107
Connectivity between CN and precuneus/ PCC DMN	Family and friend visits (group 2)	0.0605305	-0.0417561	0.162817	0.246067	0.825107
Connectivity between anterior DMN2 and ECN	Sports club/gym attendance (group 1)	-0.0443738	-0.119367	0.0306197	0.246123	0.825107
Connectivity between SMN and AN	Adult educational classes (group 3)	-0.0668816	-0.180084	0.046321	0.246834	0.825107
Connectivity between medial VN2 and right CON	Pubs/social clubs (group 2)	-0.0497424	-0.133949	0.0344645	0.246911	0.825107
Connectivity between left FPN and AN2	Leisure-time computer use (group 1)	0.119805	-0.083012	0.322621	0.246921	0.825107
Connectivity between left FPN and medial VN2	Leisure-time computer use (group 3)	0.0845498	-0.0586091	0.227709	0.247004	0.825107
Connectivity between AN2 and lateral VN2	Religious activities (group 3)	0.0346813	-0.0240413	0.0934039	0.247008	0.825107
Connectivity between AN2 and BGN	Religious activities (group 2)	-0.0793282	-0.213656	0.0549994	0.247038	0.825107
Connectivity between posterior DMN and SMN2	Family and friend visits (group 3)	-0.0471456	-0.127017	0.0327256	0.247268	0.825107
Connectivity between posterior DMN2 and SMN2	Leisure-time computer use (group 2)	-0.0945665	-0.254838	0.0657047	0.247452	0.825107
Connectivity between anterior DMN and lateral VN2	Adult educational classes (group 2)	0.0572885	-0.0398307	0.154408	0.247583	0.825107
Connectivity between medial VN2 and AN2	Family and friend visits (group 1)	0.0646359	-0.04502	0.174292	0.247931	0.825107
Connectivity between SMN and medial VN	Sports club/gym attendance (group 2)	0.0451352	-0.0314508	0.121721	0.248014	0.825107
Connectivity between anterior DMN2 and right CON	Leisure-time computer use (group 2)	-0.0933968	-0.251914	0.0651202	0.248133	0.825107
Connectivity between AN2 and precuneus/ PCC DMN	Leisure-time computer use (group 3)	-0.0840468	-0.226751	0.0586571	0.24832	0.825107
Connectivity between SMN2 and BGN	Sports club/gym attendance (group 2)	0.0444725	-0.0310414	0.119986	0.248342	0.825107
Connectivity between medial VN2 and right CON	Adult educational classes (group 1)	0.0508494	-0.0355097	0.137208	0.248437	0.825107
Connectivity between SMN2 and left CON	Pubs/social clubs (group 2)	0.0494125	-0.0345783	0.133403	0.248843	0.825107
Connectivity between posterior DMN and BGN	Religious activities (group 3)	-0.0346393	-0.0935626	0.0242839	0.249194	0.825107
Connectivity between SMN2 and AN2	Pubs/social clubs (group 2)	0.0491712	-0.0345124	0.132855	0.249425	0.825107
Connectivity between anterior DMN2 and BGN	Leisure-time computer use (group 1)	-0.118811	-0.321147	0.0835253	0.249739	0.825107
Connectivity between posterior DMN2 and ECN	Adult educational classes (group 3)	-0.0662443	-0.179071	0.0465821	0.249788	0.825107
Connectivity between anterior DMN and right FPN	Family and friend visits (group 1)	0.0642808	-0.0452095	0.173771	0.249823	0.825107
Connectivity between SMN3 and CN	Pubs/social clubs (group 3)	-0.0344748	-0.0932076	0.024258	0.249915	0.825107
Connectivity between lateral VN and right CON	Leisure-time computer use (group 3)	0.0836139	-0.0589969	0.226225	0.250455	0.825107
Connectivity between anterior DMN and right CON	Pubs/social clubs (group 2)	0.0492138	-0.0347546	0.133182	0.250624	0.825107
Connectivity between anterior DMN and medial VN	Sports club/gym attendance (group 1)	0.0441473	-0.0311826	0.119477	0.250662	0.825107
Connectivity between posterior DMN2 and anterior DMN2	Family and friend visits (group 2)	0.0612737	-0.0432824	0.16583	0.250674	0.825107
Global GM volume	Pubs/social clubs (group 2)	0.0240994	-0.0167983	0.0649971	0.248078	0.825107
Volume of GM in angular gyrus	Family and friend visits (group 3)	0.0419988	-0.0289095	0.112907	0.245649	0.825107
Volume of GM in cingulate gyrus anterior division	Sports club/gym attendance (group 1)	0.0387766	-0.0272692	0.104822	0.249802	0.825107
Volume of GM in crus i cerebellum	Adult educational classes (group 1)	0.0448038	-0.0306683	0.120276	0.244574	0.825107
Volume of GM in inferior temporal gyrus anterior division	Religious activities (group 2)	0.0704893	-0.0493226	0.190301	0.248823	0.825107
Volume of GM in middle temporal gyrus anterior division	Leisure-time computer use (group 1)	0.102348	-0.0704165	0.275113	0.245556	0.825107
Volume of GM in middle temporal gyrus temporooccipital part	Adult educational classes (group 1)	-0.0441967	-0.119226	0.0308329	0.248241	0.825107
Volume of GM in parahippocampal gyrus anterior division	Religious activities (group 2)	0.0635481	-0.0444365	0.171533	0.248695	0.825107
Volume of GM in precentral gyrus	Sports club/gym attendance (group 1)	-0.0349373	-0.0942448	0.0243701	0.248216	0.825107
Volume of thalamus	Pubs/social clubs (group 3)	-0.0247296	-0.0662456	0.0167864	0.242976	0.825107
Weighted mean FA in tract forceps minor	Religious activities (group 1)	0.0844153	-0.0595818	0.228412	0.250519	0.825107
Weighted mean FA in tract inferior frontooccipital fasciculus	Family and friend visits (group 2)	0.0592211	-0.0418077	0.16025	0.250558	0.825107
Weighted mean MD in tract cingulate gyrus part of cingulum	Sports club/gym attendance (group 2)	0.0444841	-0.0301745	0.119143	0.242842	0.825107
Weighted mean MD in tract forceps major	Family and friend visits (group 2)	-0.0614894	-0.165962	0.0429835	0.248634	0.825107
Connectivity between medial VN and anterior DMN2	Adult educational classes (group 2)	-0.0570005	-0.154439	0.0404376	0.25152	0.825415
Connectivity between SMN and left FPN	Sports club/gym attendance (group 2)	-0.0448721	-0.121597	0.0318529	0.25164	0.825415
Connectivity between CN and AN2	Family and friend visits (group 2)	-0.0604809	-0.1639	0.0429382	0.251665	0.825415
Connectivity between anterior DMN and anterior DMN2	Sports club/gym attendance (group 3)	-0.0309245	-0.083824	0.0219751	0.251848	0.825415
Connectivity between lateral VN2 and precuneus/ PCC DMN	Adult educational classes (group 3)	0.0656785	-0.0467844	0.178141	0.252324	0.825415
Connectivity between left FPN and SMN3	Pubs/social clubs (group 2)	-0.0488991	-0.132632	0.0348341	0.252335	0.825415
Connectivity between right FPN and precuneus/ PCC DMN	Religious activities (group 2)	0.0785994	-0.055994	0.213193	0.252344	0.825415
Connectivity between AN2 and BGN	Pubs/social clubs (group 3)	-0.0350614	-0.0951352	0.0250124	0.252618	0.825415
Volume of GM in inferior temporal gyrus anterior division	Family and friend visits (group 1)	-0.0570938	-0.154676	0.0404879	0.251443	0.825415
Volume of GM in planum polare	Adult educational classes (group 3)	0.0518426	-0.0369872	0.140673	0.252636	0.825415
Volume of GM in temporal pole	Pubs/social clubs (group 2)	0.0387755	-0.0276654	0.105216	0.252643	0.825415
Volume of hippocampus	Adult educational classes (group 1)	-0.0445117	-0.120757	0.0317337	0.252491	0.825415
Weighted mean MD in tract forceps minor	Adult educational classes (group 2)	0.0550234	-0.0390883	0.149135	0.251789	0.825415
Connectivity between medial VN and posterior DMN2	Family and friend visits (group 1)	0.0637333	-0.0455496	0.173016	0.252979	0.826041
Connectivity between AN and BGN	Family and friend visits (group 2)	-0.0608051	-0.165113	0.0435025	0.253187	0.826248
Connectivity between anterior DMN and AN2	Pubs/social clubs (group 2)	-0.0489987	-0.133144	0.0351462	0.253697	0.826556
Volume of GM in cuneal cortex	Religious activities (group 2)	-0.0683883	-0.185835	0.0490583	0.253714	0.826556
Volume of GM in x cerebellum	Family and friend visits (group 1)	0.0559766	-0.0401243	0.152078	0.253564	0.826556
Connectivity between right FPN and posterior DMN2	Religious activities (group 1)	-0.0867254	-0.235778	0.0623276	0.254081	0.826604
Connectivity between left CON and CN	Adult educational classes (group 1)	0.0501711	-0.0360623	0.136405	0.254111	0.826604
Connectivity between medial VN2 and right CON	Sports club/gym attendance (group 3)	0.0314953	-0.0226643	0.0856549	0.254339	0.826604
Connectivity between lateral VN and precuneus/ PCC DMN	Religious activities (group 2)	0.0784438	-0.0565697	0.213457	0.254764	0.826604
Connectivity between anterior DMN and anterior DMN2	Leisure-time computer use (group 1)	0.115136	-0.0830802	0.313351	0.254884	0.826604
Volume of GM in insular cortex	Adult educational classes (group 1)	0.0356258	-0.0257029	0.0969546	0.254852	0.826604
Volume of GM in x cerebellum	Pubs/social clubs (group 2)	-0.0427937	-0.116389	0.0308014	0.254382	0.826604
Weighted mean FA in tract inferior longitudinal fasciculus	Leisure-time computer use (group 3)	-0.0796473	-0.216726	0.0574314	0.254742	0.826604
Connectivity between posterior DMN and medial VN2	Religious activities (group 3)	-0.0339969	-0.0925785	0.0245846	0.255313	0.826888
Connectivity between SMN2 and right CON	Pubs/social clubs (group 3)	-0.0348561	-0.0949286	0.0252164	0.255397	0.826888
Connectivity between SMN2 and BGN	Sports club/gym attendance (group 3)	0.0310014	-0.0224302	0.0844331	0.255418	0.826888
Connectivity between SMN and BGN	Family and friend visits (group 2)	-0.060295	-0.164243	0.0436535	0.25555	0.826888
Connectivity between AN2 and right CON	Pubs/social clubs (group 2)	0.0487436	-0.035358	0.132845	0.255932	0.827044
Connectivity between SMN and AN	Adult educational classes (group 1)	-0.0502076	-0.136839	0.0364237	0.255953	0.827044
Connectivity between anterior DMN and right CON	Religious activities (group 3)	0.0340045	-0.0246786	0.0926875	0.256031	0.827044
Connectivity between AN and ECN	Pubs/social clubs (group 1)	0.0482909	-0.0351228	0.131705	0.256464	0.827762
Connectivity between anterior DMN and BGN	Sports club/gym attendance (group 2)	0.0441117	-0.032106	0.120329	0.256606	0.827762
Volume of GM in supramarginal gyrus posterior division	Family and friend visits (group 2)	0.05343	-0.0389039	0.145764	0.256687	0.827762
Connectivity between left CON and anterior DMN2	Family and friend visits (group 3)	0.0463007	-0.0337455	0.126347	0.256881	0.827921
Connectivity between posterior DMN and posterior DMN2	Pubs/social clubs (group 1)	0.0479284	-0.034996	0.130853	0.25725	0.828643
Connectivity between posterior DMN2 and CN	Sports club/gym attendance (group 1)	-0.0427293	-0.116713	0.0312546	0.257602	0.829311
Connectivity between SMN2 and SMN3	Leisure-time computer use (group 3)	0.0816324	-0.0598387	0.223103	0.258034	0.829754
Connectivity between lateral VN and right CON	Family and friend visits (group 1)	0.0632507	-0.0464286	0.17293	0.258312	0.829754
Connectivity between left CON and lateral VN2	Adult educational classes (group 3)	-0.065152	-0.178277	0.0479728	0.258938	0.829754
Connectivity between medial VN and precuneus/ PCC DMN	Adult educational classes (group 3)	-0.0642417	-0.17588	0.0473964	0.259339	0.829754
Connectivity between CN and precuneus/ PCC DMN	Family and friend visits (group 3)	-0.0449821	-0.123212	0.0332478	0.259709	0.829754
Connectivity between left FPN and BGN	Pubs/social clubs (group 1)	-0.0479394	-0.13133	0.0354508	0.259807	0.829754
Connectivity between medial VN2 and CN	Religious activities (group 3)	-0.0337769	-0.0925471	0.0249933	0.259933	0.829754
Connectivity between CN and ECN	Sports club/gym attendance (group 1)	0.0430233	-0.0318452	0.117892	0.259997	0.829754
Connectivity between medial VN and right FPN	Religious activities (group 3)	-0.0338582	-0.0927829	0.0250665	0.260039	0.829754
Connectivity between anterior DMN and medial VN	Adult educational classes (group 1)	-0.0494986	-0.135647	0.0366494	0.260059	0.829754
Volume of GM in frontal orbital cortex	Sports club/gym attendance (group 3)	0.0232188	-0.0171641	0.0636017	0.259736	0.829754
Volume of GM in iiv cerebellum	Religious activities (group 3)	-0.0309233	-0.0846187	0.0227721	0.258961	0.829754
Volume of GM in temporal occipital fusiform cortex	Pubs/social clubs (group 1)	0.03925	-0.0290458	0.107546	0.259952	0.829754
Volume of GM in vermis ix cerebellum	Leisure-time computer use (group 3)	-0.0782475	-0.214166	0.0576706	0.259132	0.829754
Volume of GM in viiib cerebellum	Family and friend visits (group 2)	0.054892	-0.0402292	0.150013	0.257993	0.829754
Weighted mean MD in tract superior longitudinal fasciculus	Leisure-time computer use (group 1)	0.109105	-0.080254	0.298463	0.258732	0.829754
Connectivity between lateral VN and BGN	Pubs/social clubs (group 1)	-0.0478134	-0.131257	0.0356304	0.261368	0.830779
Connectivity between SMN and SMN2	Pubs/social clubs (group 1)	-0.0477813	-0.131172	0.0356094	0.261385	0.830779
Connectivity between lateral VN and right FPN	Adult educational classes (group 1)	-0.0493028	-0.135361	0.0367557	0.261454	0.830779
Connectivity between CN and precuneus/ PCC DMN	Religious activities (group 3)	0.0329197	-0.0245435	0.0903829	0.261466	0.830779
Connectivity between right FPN and AN	Adult educational classes (group 1)	-0.0493588	-0.135598	0.0368803	0.261912	0.830779
Connectivity between left CON and lateral VN2	Religious activities (group 3)	-0.0337638	-0.092765	0.0252375	0.261989	0.830779
Connectivity between medial VN2 and lateral VN2	Adult educational classes (group 1)	0.0489528	-0.0366606	0.134566	0.262378	0.830779
Connectivity between medial VN2 and AN2	Pubs/social clubs (group 1)	0.0475595	-0.0356242	0.130743	0.262419	0.830779
Connectivity between posterior DMN and right CON	Leisure-time computer use (group 2)	0.0919306	-0.0688652	0.252726	0.262434	0.830779
Connectivity between medial VN and right CON	Adult educational classes (group 2)	0.055759	-0.0417757	0.153294	0.262466	0.830779
Connectivity between anterior DMN and anterior DMN2	Adult educational classes (group 2)	0.0543662	-0.0407524	0.149485	0.262568	0.830779
Connectivity between right FPN and lateral VN2	Adult educational classes (group 3)	0.064532	-0.0484046	0.177469	0.262703	0.830779
Volume of GM in frontal pole	Sports club/gym attendance (group 3)	0.0207976	-0.0154468	0.057042	0.260691	0.830779
Volume of GM in lingual gyrus	Adult educational classes (group 3)	0.0466865	-0.0348687	0.128242	0.261825	0.830779
Volume of thalamus	Family and friend visits (group 2)	0.0412837	-0.0307795	0.113347	0.261468	0.830779
Weighted mean FA in tract superior longitudinal fasciculus	Sports club/gym attendance (group 3)	-0.0300498	-0.0824339	0.0223343	0.260834	0.830779
Connectivity between medial VN2 and left CON	Leisure-time computer use (group 1)	0.115331	-0.0867172	0.317379	0.263196	0.831881
Connectivity between medial VN2 and SMN2	Leisure-time computer use (group 2)	-0.0911167	-0.250932	0.068699	0.26376	0.833203
Connectivity between BGN and lateral VN2	Sports club/gym attendance (group 3)	-0.0308779	-0.0850586	0.0233027	0.263952	0.83335
Connectivity between lateral VN2 and precuneus/ PCC DMN	Pubs/social clubs (group 1)	-0.0473034	-0.130393	0.0357862	0.264456	0.833667
Connectivity between SMN and left FPN	Pubs/social clubs (group 1)	-0.0475642	-0.131138	0.0360095	0.264605	0.833667
Connectivity between left FPN and left CON	Leisure-time computer use (group 1)	0.115864	-0.087738	0.319466	0.264653	0.833667
Connectivity between posterior DMN and AN	Family and friend visits (group 1)	-0.0624354	-0.172205	0.0473341	0.264892	0.833667
Connectivity between posterior DMN and CN	Leisure-time computer use (group 2)	-0.0911731	-0.251498	0.0691522	0.264985	0.833667
Connectivity between right FPN and AN	Religious activities (group 3)	-0.033415	-0.0921868	0.0253569	0.265088	0.833667
Connectivity between lateral VN and posterior DMN2	Religious activities (group 3)	-0.0329062	-0.0908416	0.0250292	0.265569	0.833667
Connectivity between lateral VN and medial VN	Leisure-time computer use (group 2)	-0.0906925	-0.25042	0.0690348	0.265725	0.833667
Connectivity between CN and ECN	Leisure-time computer use (group 3)	0.080452	-0.0612647	0.222169	0.265809	0.833667
Connectivity between AN and right CON	Pubs/social clubs (group 3)	0.0342316	-0.0260926	0.0945557	0.266007	0.833667
Connectivity between lateral VN2 and right CON	Leisure-time computer use (group 1)	-0.114974	-0.317722	0.0877746	0.266332	0.833667
Connectivity between SMN and lateral VN2	Sports club/gym attendance (group 2)	-0.0428783	-0.118497	0.0327405	0.266368	0.833667
Connectivity between anterior DMN and anterior DMN2	Pubs/social clubs (group 3)	0.0334205	-0.0255379	0.092379	0.266523	0.833667
Connectivity between posterior DMN2 and AN	Leisure-time computer use (group 2)	-0.0907925	-0.251019	0.0694339	0.26669	0.833667
Connectivity between left CON and AN2	Pubs/social clubs (group 2)	-0.0473012	-0.130874	0.0362714	0.267249	0.833667
Connectivity between posterior DMN and left CON	Family and friend visits (group 3)	-0.044975	-0.124462	0.0345123	0.267398	0.833667
Connectivity between SMN and AN2	Leisure-time computer use (group 2)	-0.0905792	-0.250805	0.0696464	0.267812	0.833667
Connectivity between medial VN2 and right CON	Sports club/gym attendance (group 1)	0.0426712	-0.0328187	0.118161	0.267868	0.833667
Connectivity between lateral VN and posterior DMN	Family and friend visits (group 3)	-0.0449792	-0.12462	0.0346615	0.268275	0.833667
Connectivity between left FPN and ECN	Religious activities (group 3)	0.0330509	-0.0255051	0.0916068	0.268567	0.833667
Connectivity between anterior DMN2 and AN2	Sports club/gym attendance (group 2)	0.0425884	-0.0329181	0.118095	0.268903	0.833667
Connectivity between anterior DMN2 and ECN	Family and friend visits (group 1)	-0.0615448	-0.170747	0.0476578	0.269288	0.833667
Connectivity between left FPN and anterior DMN2	Leisure-time computer use (group 3)	0.0803266	-0.0622048	0.222858	0.269298	0.833667
Connectivity between medial VN and precuneus/ PCC DMN	Family and friend visits (group 1)	-0.0612386	-0.169994	0.0475165	0.269709	0.833667
Connectivity between lateral VN and SMN	Leisure-time computer use (group 1)	-0.114432	-0.317687	0.0888237	0.269788	0.833667
Connectivity between left CON and ECN	Leisure-time computer use (group 1)	-0.114118	-0.316862	0.088625	0.269893	0.833667
Connectivity between anterior DMN and AN2	Leisure-time computer use (group 1)	0.114099	-0.0887229	0.31692	0.270161	0.833667
Connectivity between anterior DMN and posterior DMN	Sports club/gym attendance (group 3)	-0.0302899	-0.0841401	0.0235604	0.270223	0.833667
Connectivity between left FPN and AN	Pubs/social clubs (group 1)	0.0468503	-0.0364945	0.130195	0.270528	0.833667
Connectivity between AN and precuneus/ PCC DMN	Religious activities (group 3)	-0.0330154	-0.0917716	0.0257408	0.270716	0.833667
Connectivity between lateral VN and right FPN	Family and friend visits (group 2)	0.0586802	-0.0457705	0.163131	0.270807	0.833667
Connectivity between SMN3 and CN	Adult educational classes (group 3)	0.0616717	-0.0481131	0.171456	0.270847	0.833667
Connectivity between medial VN and posterior DMN	Adult educational classes (group 1)	-0.0483967	-0.13456	0.0377665	0.270902	0.833667
Connectivity between right FPN and posterior DMN	Family and friend visits (group 1)	0.0616414	-0.0482345	0.171517	0.27148	0.833667
Connectivity between anterior DMN and left CON	Leisure-time computer use (group 1)	0.113207	-0.0886118	0.315025	0.271546	0.833667
Connectivity between SMN and SMN3	Leisure-time computer use (group 1)	-0.109863	-0.305796	0.0860705	0.271732	0.833667
Connectivity between posterior DMN2 and AN2	Pubs/social clubs (group 2)	0.0466216	-0.0365371	0.12978	0.271801	0.833667
Connectivity between right FPN and left CON	Adult educational classes (group 3)	-0.0624109	-0.173783	0.0489609	0.272016	0.833667
Connectivity between anterior DMN and left CON	Adult educational classes (group 1)	0.0480858	-0.0377791	0.133951	0.272329	0.833667
Connectivity between medial VN and left CON	Religious activities (group 2)	-0.0758319	-0.211246	0.0595824	0.272344	0.833667
Volume of GM in iiv cerebellum	Leisure-time computer use (group 2)	0.0826098	-0.0638998	0.229119	0.269059	0.833667
Volume of GM in inferior frontal gyrus pars triangularis	Family and friend visits (group 3)	0.0412618	-0.0319543	0.114478	0.269306	0.833667
Volume of GM in middle frontal gyrus	Adult educational classes (group 3)	0.0517507	-0.039884	0.143385	0.268298	0.833667
Volume of GM in middle temporal gyrus posterior division	Sports club/gym attendance (group 3)	0.0243493	-0.0185346	0.0672332	0.265725	0.833667
Volume of GM in occipital fusiform gyrus	Family and friend visits (group 1)	0.0520137	-0.0397009	0.143728	0.26629	0.833667
Volume of GM in occipital fusiform gyrus	Leisure-time computer use (group 2)	0.0756252	-0.0583765	0.209627	0.268628	0.833667
Volume of GM in planum temporale	Sports club/gym attendance (group 3)	-0.0243368	-0.0677962	0.0191227	0.272354	0.833667
Volume of GM in superior temporal gyrus posterior division	Family and friend visits (group 1)	0.0513348	-0.0395257	0.142195	0.268099	0.833667
Volume of GM in vermis vi cerebellum	Religious activities (group 3)	-0.0313981	-0.087266	0.0244698	0.27063	0.833667
Volume of GM in vermis viib cerebellum	Religious activities (group 2)	0.0724973	-0.056188	0.201183	0.26947	0.833667
Volume of putamen	Pubs/social clubs (group 2)	-0.0358788	-0.0999189	0.0281613	0.272125	0.833667
Volume of thalamus	Sports club/gym attendance (group 1)	-0.02935	-0.0812458	0.0225457	0.267614	0.833667
Weighted mean FA in tract corticospinal tract	Family and friend visits (group 2)	-0.0559152	-0.155604	0.0437732	0.271574	0.833667
Weighted mean FA in tract forceps minor	Pubs/social clubs (group 3)	0.0322929	-0.0252111	0.089797	0.270996	0.833667
Weighted mean MD in tract anterior thalamic radiation	Pubs/social clubs (group 3)	0.0295893	-0.0224131	0.0815917	0.264714	0.833667
Weighted mean MD in tract cingulate gyrus part of cingulum	Family and friend visits (group 1)	-0.0603648	-0.167563	0.0468332	0.269686	0.833667
Weighted mean MD in tract corticospinal tract	Sports club/gym attendance (group 1)	0.0419715	-0.0322297	0.116173	0.267541	0.833667
Connectivity between anterior DMN and SMN	Pubs/social clubs (group 3)	-0.0336308	-0.0937197	0.0264582	0.272615	0.833802
Connectivity between SMN and lateral VN2	Pubs/social clubs (group 2)	-0.0465442	-0.129719	0.0366305	0.27269	0.833802
Connectivity between lateral VN and SMN3	Religious activities (group 1)	-0.084436	-0.235429	0.066557	0.273025	0.834126
Weighted mean MD in tract inferior longitudinal fasciculus	Pubs/social clubs (group 2)	-0.0440153	-0.122736	0.0347055	0.273087	0.834126
Connectivity between left FPN and AN	Family and friend visits (group 2)	-0.0584298	-0.163083	0.0462236	0.273787	0.834397
Connectivity between left FPN and posterior DMN	Sports club/gym attendance (group 2)	0.0424873	-0.0336293	0.118604	0.273899	0.834397
Connectivity between right FPN and BGN	Pubs/social clubs (group 3)	-0.0333858	-0.0932481	0.0264765	0.274309	0.834397
Connectivity between anterior DMN2 and ECN	Adult educational classes (group 1)	0.0478474	-0.0379489	0.133644	0.27433	0.834397
Connectivity between posterior DMN2 and anterior DMN2	Adult educational classes (group 3)	-0.0627982	-0.175412	0.0498154	0.274367	0.834397
Connectivity between right FPN and anterior DMN2	Leisure-time computer use (group 2)	-0.0892934	-0.249461	0.0708742	0.27449	0.834397
Connectivity between anterior DMN2 and CN	Family and friend visits (group 1)	-0.0606948	-0.169599	0.0482093	0.274642	0.834397
Connectivity between SMN2 and anterior DMN2	Religious activities (group 1)	-0.0839686	-0.234831	0.0668942	0.275275	0.834397
Connectivity between left FPN and SMN3	Religious activities (group 3)	0.0325533	-0.025993	0.0910996	0.27576	0.834397
Connectivity between left FPN and posterior DMN	Pubs/social clubs (group 1)	-0.0460635	-0.128963	0.0368358	0.27608	0.834397
Connectivity between lateral VN and SMN2	Adult educational classes (group 1)	-0.0477665	-0.133731	0.0381981	0.276082	0.834397
Connectivity between lateral VN and CN	Pubs/social clubs (group 3)	-0.0332371	-0.0930648	0.0265905	0.276173	0.834397
Connectivity between posterior DMN2 and left CON	Adult educational classes (group 3)	-0.0622759	-0.174476	0.0499238	0.276608	0.834397
Connectivity between SMN and SMN2	Family and friend visits (group 1)	0.0609595	-0.048972	0.170891	0.277061	0.834397
Connectivity between right FPN and SMN3	Family and friend visits (group 1)	-0.0608278	-0.170562	0.0489062	0.277236	0.834397
Connectivity between SMN2 and right CON	Pubs/social clubs (group 2)	-0.0464229	-0.130213	0.037367	0.27748	0.834397
Connectivity between right FPN and precuneus/ PCC DMN	Leisure-time computer use (group 1)	-0.1121	-0.314458	0.0902592	0.277544	0.834397
Connectivity between anterior DMN2 and BGN	Pubs/social clubs (group 2)	0.0464559	-0.0374597	0.130372	0.277858	0.834397
Connectivity between SMN and ECN	Religious activities (group 1)	-0.0831578	-0.233458	0.0671423	0.27814	0.834397
Connectivity between AN and ECN	Leisure-time computer use (group 1)	-0.112333	-0.315396	0.0907311	0.278218	0.834397
Connectivity between BGN and lateral VN2	Pubs/social clubs (group 3)	-0.0333777	-0.0937484	0.026993	0.278487	0.834397
Connectivity between AN and SMN3	Pubs/social clubs (group 2)	-0.0455368	-0.127961	0.0368875	0.278845	0.834397
Connectivity between AN and ECN	Family and friend visits (group 1)	-0.0607228	-0.170672	0.049226	0.279006	0.834397
Connectivity between anterior DMN and AN2	Sports club/gym attendance (group 2)	-0.0422186	-0.118721	0.034284	0.279375	0.834397
Connectivity between right FPN and SMN2	Religious activities (group 3)	-0.0324061	-0.0911851	0.0263729	0.279844	0.834397
Connectivity between medial VN2 and lateral VN2	Religious activities (group 2)	0.0736125	-0.0601772	0.207402	0.280813	0.834397
Connectivity between medial VN and SMN3	Religious activities (group 1)	0.082928	-0.067822	0.233678	0.280907	0.834397
Connectivity between lateral VN and anterior DMN2	Family and friend visits (group 3)	0.0440587	-0.036064	0.124181	0.281093	0.834397
Connectivity between right FPN and SMN3	Religious activities (group 2)	0.0740782	-0.0606477	0.208804	0.281134	0.834397
Connectivity between anterior DMN and anterior DMN2	Sports club/gym attendance (group 2)	0.0411061	-0.0336558	0.115868	0.281149	0.834397
Connectivity between lateral VN and precuneus/ PCC DMN	Sports club/gym attendance (group 3)	-0.0297904	-0.0839772	0.0243965	0.281198	0.834397
Connectivity between lateral VN and SMN2	Family and friend visits (group 2)	-0.05732	-0.16161	0.04697	0.281329	0.834397
Connectivity between left CON and right CON	Adult educational classes (group 3)	-0.0617596	-0.174138	0.0506187	0.281375	0.834397
Connectivity between posterior DMN and BGN	Adult educational classes (group 1)	-0.0475049	-0.13397	0.03896	0.281511	0.834397
Connectivity between lateral VN and left CON	Sports club/gym attendance (group 3)	-0.0295244	-0.0832656	0.0242167	0.281538	0.834397
Volume of amygdala	Pubs/social clubs (group 3)	-0.0309897	-0.086733	0.0247536	0.275838	0.834397
Volume of GM in cingulate gyrus anterior division	Family and friend visits (group 2)	-0.0511254	-0.142783	0.0405323	0.274244	0.834397
Volume of GM in cingulate gyrus posterior division	Sports club/gym attendance (group 3)	-0.0216331	-0.0603836	0.0171175	0.273832	0.834397
Volume of GM in cingulate gyrus posterior division	Pubs/social clubs (group 1)	0.0331811	-0.0264631	0.0928252	0.275509	0.834397
Volume of GM in cuneal cortex	Family and friend visits (group 2)	0.0503384	-0.0408249	0.141502	0.279097	0.834397
Volume of GM in ix cerebellum	Leisure-time computer use (group 2)	-0.0829945	-0.234072	0.0680832	0.281566	0.834397
Volume of GM in precentral gyrus	Religious activities (group 3)	-0.0256769	-0.071913	0.0205592	0.276351	0.834397
Volume of GM in precuneous cortex	Religious activities (group 1)	-0.062089	-0.175127	0.0509489	0.281631	0.834397
Volume of GM in v cerebellum	Sports club/gym attendance (group 1)	-0.0370604	-0.103741	0.02962	0.275964	0.834397
Volume of GM in viib cerebellum	Religious activities (group 3)	-0.0293038	-0.0826083	0.0240007	0.281222	0.834397
Volume of GM in x cerebellum	Sports club/gym attendance (group 3)	0.026022	-0.0213211	0.073365	0.281306	0.834397
Weighted mean FA in tract cingulate gyrus part of cingulum	Family and friend visits (group 3)	0.0431539	-0.0344454	0.120753	0.275686	0.834397
Weighted mean FA in tract forceps major	Religious activities (group 1)	0.0843233	-0.0667022	0.235349	0.273769	0.834397
Weighted mean FA in tract forceps minor	Leisure-time computer use (group 3)	-0.0753089	-0.211436	0.0608184	0.278187	0.834397
Weighted mean FA in tract inferior longitudinal fasciculus	Pubs/social clubs (group 3)	0.0319394	-0.0259574	0.0898362	0.279548	0.834397
Weighted mean FA in tract medial lemniscus	Sports club/gym attendance (group 2)	-0.0407526	-0.114402	0.0328965	0.278091	0.834397
Weighted mean FA in tract medial lemniscus	Adult educational classes (group 2)	-0.05181	-0.145525	0.0419052	0.278516	0.834397
Weighted mean FA in tract middle cerebellar peduncle	Pubs/social clubs (group 3)	0.0323612	-0.0264414	0.0911638	0.280703	0.834397
Weighted mean MD in tract acoustic radiation	Sports club/gym attendance (group 3)	-0.0294374	-0.0829921	0.0241174	0.281287	0.834397
Weighted mean MD in tract corticospinal tract	Religious activities (group 1)	-0.0826335	-0.231219	0.0659522	0.275668	0.834397
Weighted mean MD in tract forceps major	Sports club/gym attendance (group 3)	0.029895	-0.0241276	0.0839176	0.278052	0.834397
Weighted mean MD in tract forceps minor	Family and friend visits (group 1)	-0.0585064	-0.164726	0.0477135	0.280295	0.834397
Weighted mean MD in tract medial lemniscus	Leisure-time computer use (group 3)	-0.0753715	-0.211167	0.0604244	0.276617	0.834397
Connectivity between left FPN and right CON	Adult educational classes (group 1)	-0.0469702	-0.132527	0.0385865	0.281877	0.834695
Connectivity between AN and ECN	Sports club/gym attendance (group 1)	0.0414513	-0.0340756	0.116978	0.282023	0.834695
Connectivity between posterior DMN2 and right CON	Pubs/social clubs (group 3)	0.033113	-0.027244	0.0934699	0.282207	0.834808
Connectivity between lateral VN and SMN3	Leisure-time computer use (group 2)	0.0879625	-0.0724387	0.248364	0.282408	0.83497
Connectivity between posterior DMN2 and precuneus/ PCC DMN	Adult educational classes (group 1)	0.0465532	-0.0383824	0.131489	0.282662	0.834975
Connectivity between ECN and BGN	Religious activities (group 3)	-0.0322622	-0.0911289	0.0266044	0.282701	0.834975
Connectivity between anterior DMN2 and lateral VN2	Pubs/social clubs (group 1)	0.0455759	-0.0377383	0.12889	0.283597	0.836467
Connectivity between anterior DMN and posterior DMN2	Adult educational classes (group 2)	0.052776	-0.0437448	0.149297	0.28382	0.836467
Connectivity between AN2 and BGN	Leisure-time computer use (group 2)	0.0873935	-0.0724519	0.247239	0.28386	0.836467
Connectivity between posterior DMN and AN	Leisure-time computer use (group 3)	-0.0780286	-0.220768	0.0647108	0.283937	0.836467
Volume of GM in juxtapositional lobule cortex formerly supplementary motor cortex	Religious activities (group 1)	-0.0745137	-0.210765	0.0617379	0.283733	0.836467
Volume of GM in temporal pole	Religious activities (group 3)	-0.0253824	-0.0718357	0.0210708	0.284151	0.836666
Connectivity between anterior DMN and ECN	Pubs/social clubs (group 2)	0.0455728	-0.0378638	0.129009	0.284337	0.836739
Connectivity between lateral VN and left FPN	Adult educational classes (group 2)	0.053	-0.044061	0.150061	0.284468	0.836739
Connectivity between posterior DMN and SMN2	Leisure-time computer use (group 3)	-0.0777287	-0.220175	0.0647179	0.284802	0.837062
Connectivity between AN and precuneus/ PCC DMN	Pubs/social clubs (group 2)	-0.0458275	-0.129871	0.0382156	0.285141	0.837062
Volume of GM in supramarginal gyrus posterior division	Religious activities (group 3)	-0.0282959	-0.0801723	0.0235804	0.284996	0.837062
Volume of GM in x cerebellum	Family and friend visits (group 3)	0.038199	-0.0318573	0.108255	0.285162	0.837062
Volume of thalamus	Religious activities (group 1)	-0.0565884	-0.160559	0.0473817	0.286034	0.839172
Global WM volume	Religious activities (group 2)	0.0367375	-0.0307802	0.104255	0.286175	0.839172
Connectivity between AN and SMN3	Pubs/social clubs (group 1)	-0.0443899	-0.126013	0.0372329	0.286418	0.839262
Connectivity between anterior DMN and medial VN2	Sports club/gym attendance (group 2)	0.0416454	-0.0349618	0.118253	0.286613	0.839262
Weighted mean FA in tract posterior thalamic radiation	Sports club/gym attendance (group 1)	-0.0394469	-0.112015	0.033121	0.286645	0.839262
Connectivity between AN and AN2	Pubs/social clubs (group 3)	-0.0324501	-0.0922014	0.0273012	0.287089	0.839717
Connectivity between posterior DMN2 and BGN	Sports club/gym attendance (group 2)	-0.0410216	-0.116557	0.0345135	0.287094	0.839717
Connectivity between medial VN and right CON	Sports club/gym attendance (group 2)	0.0415854	-0.0350758	0.118247	0.287647	0.839719
Connectivity between left CON and BGN	Pubs/social clubs (group 3)	0.0327147	-0.0276421	0.0930714	0.288034	0.839719
Connectivity between anterior DMN and medial VN2	Religious activities (group 3)	0.0319169	-0.0269815	0.0908153	0.288145	0.839719
Connectivity between left CON and right CON	Sports club/gym attendance (group 1)	0.0407579	-0.0344636	0.115979	0.288198	0.839719
Connectivity between right FPN and AN2	Adult educational classes (group 3)	0.06085	-0.0514623	0.173162	0.288237	0.839719
Connectivity between medial VN and anterior DMN2	Pubs/social clubs (group 2)	0.0456326	-0.0386043	0.129869	0.288305	0.839719
Connectivity between lateral VN and right CON	Sports club/gym attendance (group 1)	-0.0407985	-0.116128	0.0345312	0.28841	0.839719
Connectivity between right FPN and SMN2	Leisure-time computer use (group 3)	0.0772729	-0.065404	0.21995	0.288415	0.839719
Weighted mean MD in tract inferior longitudinal fasciculus	Religious activities (group 1)	-0.0765818	-0.217904	0.0647408	0.288148	0.839719
Connectivity between lateral VN and CN	Sports club/gym attendance (group 1)	0.0404778	-0.0343471	0.115303	0.288973	0.840906
Connectivity between right FPN and left CON	Family and friend visits (group 2)	0.0559159	-0.047492	0.159324	0.289183	0.840906
Connectivity between BGN and right CON	Leisure-time computer use (group 2)	-0.0863994	-0.246285	0.0734862	0.289494	0.840906
Connectivity between SMN2 and SMN3	Sports club/gym attendance (group 1)	0.0403591	-0.0343278	0.115046	0.289499	0.840906
Connectivity between ECN and right CON	Sports club/gym attendance (group 1)	0.0403407	-0.0343389	0.11502	0.289672	0.840906
Global WMH volume	Adult educational classes (group 2)	0.0442607	-0.0376812	0.126203	0.289704	0.840906
Connectivity between lateral VN and ECN	Leisure-time computer use (group 1)	0.108387	-0.0923721	0.309147	0.289937	0.841155
Weighted mean FA in tract forceps major	Sports club/gym attendance (group 1)	-0.0406952	-0.116112	0.0347212	0.290187	0.841455
Connectivity between lateral VN and precuneus/ PCC DMN	Adult educational classes (group 2)	0.0525241	-0.0449075	0.149956	0.290652	0.842241
Connectivity between lateral VN and lateral VN2	Sports club/gym attendance (group 1)	0.0402181	-0.0344244	0.114861	0.2909	0.842241
Volume of GM in x cerebellum	Adult educational classes (group 1)	-0.040677	-0.116165	0.0348112	0.290862	0.842241
Connectivity between AN and AN2	Religious activities (group 3)	0.0313464	-0.0268971	0.0895899	0.291451	0.842588
Connectivity between medial VN and medial VN2	Sports club/gym attendance (group 1)	0.0405116	-0.034808	0.115831	0.291749	0.842588
Connectivity between posterior DMN2 and SMN2	Adult educational classes (group 2)	0.0522706	-0.0449403	0.149482	0.291892	0.842588
Connectivity between anterior DMN and left FPN	Adult educational classes (group 2)	0.052376	-0.0450917	0.149844	0.292193	0.842588
Connectivity between medial VN2 and AN2	Religious activities (group 2)	0.0723605	-0.0622979	0.207019	0.292197	0.842588
Volume of GM in ix cerebellum	Pubs/social clubs (group 1)	0.0421621	-0.0362218	0.120546	0.291723	0.842588
Volume of GM in occipital fusiform gyrus	Adult educational classes (group 1)	0.0387167	-0.033322	0.110755	0.292126	0.842588
Volume of GM in vermis crus ii cerebellum	Pubs/social clubs (group 2)	0.0445235	-0.0382169	0.127264	0.291526	0.842588
Volume of GM in intracalcarine cortex	Family and friend visits (group 2)	0.0506999	-0.0437164	0.145116	0.292539	0.843149
Volume of GM in supracalcarine cortex	Leisure-time computer use (group 2)	-0.0752627	-0.215541	0.0650154	0.292951	0.84391
Connectivity between SMN2 and lateral VN2	Leisure-time computer use (group 2)	-0.0857934	-0.245867	0.07428	0.293457	0.843923
Connectivity between SMN3 and ECN	Adult educational classes (group 3)	-0.0598563	-0.171589	0.0518762	0.293684	0.843923
Connectivity between SMN and right FPN	Religious activities (group 3)	0.0314623	-0.0272881	0.0902128	0.293851	0.843923
Connectivity between ECN and AN2	Family and friend visits (group 3)	-0.0428105	-0.122787	0.0371658	0.294063	0.843923
Connectivity between posterior DMN2 and right CON	Pubs/social clubs (group 1)	0.0446248	-0.0387432	0.127993	0.294077	0.843923
Volume of pallidum	Adult educational classes (group 2)	-0.0459029	-0.131669	0.0398631	0.294135	0.843923
Weighted mean FA in tract middle cerebellar peduncle	Family and friend visits (group 3)	0.0418533	-0.0362008	0.119907	0.293235	0.843923
Weighted mean MD in tract medial lemniscus	Sports club/gym attendance (group 1)	0.0384522	-0.033289	0.110193	0.293437	0.843923
Connectivity between SMN2 and precuneus/ PCC DMN	Religious activities (group 1)	0.080667	-0.0702206	0.231555	0.294671	0.845038
Weighted mean MD in tract superior longitudinal fasciculus	Leisure-time computer use (group 3)	0.0712032	-0.0621418	0.204548	0.295248	0.84627
Connectivity between left FPN and right CON	Pubs/social clubs (group 1)	0.0440763	-0.0385599	0.126712	0.295791	0.847355
[truncated: 3,726 more rows]

## Sheet: Cognitive results
Table S7: The results of all linear regression models performed to examine the relationship between leisure activities and global cognitive function. Group 1 = Weekly to low engagement; group 2 = low to weekly engagement; group 3 = stable weekly engagement. Note that the low stable group served as the reference group. Bold text indicates associations that survived multiple comparison corrections.
Dependent Variable	Term	β	conf.low	conf.high	p-value	FDR q-value
Global cognition	Leisure-time computer use (group 3)	0.621511	0.352169	0.890852	6.43102e-06	0.000115758
Global cognition	Adult educational classes (group 3)	0.276227	0.0673417	0.485111	0.00957705	0.0861934
Global cognition	Leisure-time computer use (group 2)	0.357138	0.0543508	0.659925	0.0208179	0.124907
Global cognition	Leisure-time computer use (group 1)	0.324761	-0.0407527	0.690274	0.0815705	0.367067
Global cognition	Sports club/gym attendance (group 2)	-0.0864208	-0.221626	0.0487839	0.210134	0.615472
Global cognition	Religious activities (group 2)	0.160719	-0.110533	0.431971	0.245349	0.615472
Global cognition	Pubs/social clubs (group 1)	-0.0866684	-0.239692	0.0663548	0.266784	0.615472
Global cognition	Sports club/gym attendance (group 1)	-0.0748766	-0.21737	0.0676164	0.302853	0.615472
Global cognition	Sports club/gym attendance (group 3)	-0.0521058	-0.152272	0.04806	0.307736	0.615472
Global cognition	Adult educational classes (group 1)	0.0658389	-0.0832177	0.214896	0.386426	0.647508
Global cognition	Family and friend visits (group 1)	-0.0854403	-0.283732	0.112851	0.398165	0.647508
Global cognition	Family and friend visits (group 3)	-0.0572864	-0.20513	0.0905568	0.447367	0.647508
Global cognition	Family and friend visits (group 2)	-0.0705534	-0.261034	0.119927	0.467645	0.647508
Global cognition	Religious activities (group 3)	-0.0336421	-0.141578	0.0742938	0.541065	0.68757
Global cognition	Pubs/social clubs (group 2)	0.0431108	-0.107339	0.193561	0.574178	0.68757
Global cognition	Adult educational classes (group 2)	0.0459715	-0.13135	0.223293	0.611173	0.68757
Global cognition	Pubs/social clubs (group 3)	-0.0225574	-0.135566	0.0904515	0.695476	0.718068
Global cognition	Religious activities (group 1)	0.0505405	-0.223975	0.325056	0.718068	0.718068

## Sheet: Posthoc MRI results
Table S8: Posthoc results after the main MRI analyses were repeated with a measure of cumulative activity (i.e., sum of activities engaged in on a weekly basis across the two timepoints). Group 1 = Weekly to low engagement; group 2 = low to weekly engagement; group 3 = stable weekly engagement. Note that the low stable group served as the reference group. Bold text indicates comparisons that surv…
Dependent Variable	Term	β	conf.low	conf.high	p-value	FDR q-value
Connectivity between SMN3 and CN	Sports club/gym attendance (group 3)	0.123698	0.0710629	0.176333	4.15793e-06	0.0215061
Connectivity between SMN3 and lateral VN2	Sports club/gym attendance (group 3)	0.122999	0.0693396	0.176658	7.11886e-06	0.0215061
Volume of GM in occipital pole average	Family and friend visits (group 3)	0.144425	0.0781716	0.210678	1.9516e-05	0.0393053
Volume of putamen average	Leisure-time computer use (group 3)	0.22436	0.115837	0.332883	5.11644e-05	0.0662877
Connectivity between medial VN2 and posterior DMN2	Cumulative activity	0.0326758	0.0168065	0.0485452	5.48557e-05	0.0662877
Volume of putamen average	Leisure-time computer use (group 1)	0.285094	0.130984	0.439203	0.000289369	0.241177
Weighted mean FA in tract posterior thalamic radiation average	Religious activities (group 2)	-0.238114	-0.367743	-0.108485	0.000319334	0.241177
Connectivity between SMN3 and BGN	Cumulative activity	-0.028703	-0.0443206	-0.0130855	0.000316975	0.241177
Connectivity between AN and CN	Sports club/gym attendance (group 3)	0.0973029	0.0437589	0.150847	0.00036995	0.24836
Connectivity between SMN3 and lateral VN2	Cumulative activity	0.027972	0.0122212	0.0437229	0.000501975	0.303293
Volume of hippocampus average	Leisure-time computer use (group 3)	0.220218	0.0941156	0.34632	0.000622017	0.323793
Connectivity between SMN2 and SMN3	Sports club/gym attendance (group 3)	0.0933271	0.0397436	0.146911	0.000643085	0.323793
Volume of accumbens average	Leisure-time computer use (group 1)	0.269453	0.0923141	0.446592	0.00287449	0.347924
Volume of GM in frontal operculum cortex average	Leisure-time computer use (group 3)	0.201198	0.0784975	0.323898	0.00131301	0.347924
Volume of GM in frontal operculum cortex average	Leisure-time computer use (group 2)	0.209097	0.0712216	0.346972	0.00295971	0.347924
Volume of GM in iiv cerebellum average	Family and friend visits (group 1)	-0.160688	-0.260908	-0.0604681	0.00167884	0.347924
Volume of GM in inferior frontal gyrus pars opercularis average	Pubs/social clubs (group 3)	-0.0865253	-0.140951	-0.0320997	0.00183764	0.347924
Volume of GM in inferior temporal gyrus posterior division average	Adult educational classes (group 2)	-0.137103	-0.219108	-0.0550988	0.00105263	0.347924
Volume of GM in insular cortex average	Leisure-time computer use (group 3)	0.171701	0.0702513	0.273151	0.000912019	0.347924
Volume of GM in lingual gyrus average	Pubs/social clubs (group 2)	0.102637	0.0418226	0.16345	0.000942892	0.347924
Volume of GM in occipital fusiform gyrus average	Pubs/social clubs (group 1)	0.118796	0.049304	0.188288	0.000809073	0.347924
Volume of GM in occipital fusiform gyrus average	Religious activities (group 3)	-0.0756737	-0.124729	-0.0266183	0.00250355	0.347924
Volume of GM in occipital pole average	Family and friend visits (group 1)	0.138143	0.0472592	0.229027	0.00289556	0.347924
Volume of GM in precentral gyrus average	Leisure-time computer use (group 3)	0.171274	0.0590542	0.283494	0.00278218	0.347924
Volume of GM in vermis viib cerebellum average	Pubs/social clubs (group 3)	-0.0879215	-0.145448	-0.0303953	0.00274429	0.347924
Volume of putamen average	Religious activities (group 3)	-0.0728627	-0.117591	-0.0281339	0.00141267	0.347924
Weighted mean FA in tract acoustic radiation average	Leisure-time computer use (group 3)	-0.213096	-0.352909	-0.0732826	0.00281972	0.347924
Weighted mean MD in tract acoustic radiation average	Leisure-time computer use (group 1)	0.310426	0.109877	0.510976	0.00241964	0.347924
Weighted mean MD in tract middle cerebellar peduncle average	Leisure-time computer use (group 3)	-0.20999	-0.348404	-0.0715749	0.00294954	0.347924
Connectivity between SMN and medial VN2	Religious activities (group 2)	-0.225916	-0.360487	-0.0913447	0.00100349	0.347924
Connectivity between SMN3 and BGN	Sports club/gym attendance (group 3)	-0.088822	-0.142069	-0.0355752	0.00108056	0.347924
Connectivity between SMN2 and ECN	Religious activities (group 2)	0.220727	0.0874761	0.353979	0.00117093	0.347924
Connectivity between posterior DMN2 and AN2	Family and friend visits (group 1)	-0.179479	-0.287996	-0.0709622	0.0011916	0.347924
Connectivity between AN and SMN3	Sports club/gym attendance (group 3)	0.0854327	0.0324342	0.138431	0.0015845	0.347924
Connectivity between AN2 and lateral VN2	Cumulative activity	0.0254867	0.00964181	0.0413315	0.00162182	0.347924
Connectivity between AN and CN	Cumulative activity	0.0252553	0.00954525	0.0409653	0.00163189	0.347924
Connectivity between left FPN and ECN	Sports club/gym attendance (group 3)	-0.0863348	-0.140186	-0.0324838	0.00168038	0.347924
Connectivity between AN and AN2	Sports club/gym attendance (group 3)	0.0858953	0.0323155	0.139475	0.00168138	0.347924
Connectivity between AN and lateral VN2	Pubs/social clubs (group 2)	-0.134634	-0.218681	-0.0505878	0.00169523	0.347924
Connectivity between anterior DMN and lateral VN2	Cumulative activity	0.02529	0.00944501	0.0411349	0.00176225	0.347924
Connectivity between SMN2 and AN	Cumulative activity	0.0250205	0.00923938	0.0408017	0.00189106	0.347924
Connectivity between anterior DMN and BGN	Religious activities (group 3)	0.0924071	0.0338594	0.150955	0.00198256	0.347924
Connectivity between SMN and posterior DMN2	Pubs/social clubs (group 3)	0.0950311	0.0347151	0.155347	0.00201909	0.347924
Connectivity between anterior DMN and lateral VN2	Adult educational classes (group 1)	0.135314	0.0492009	0.221428	0.00207571	0.347924
Connectivity between right FPN and right CON	Religious activities (group 3)	0.0920759	0.0333508	0.150801	0.00212309	0.347924
Connectivity between anterior DMN and precuneus/PCC DMN	Cumulative activity	0.0242246	0.00873871	0.0397105	0.00217395	0.347924
Connectivity between SMN2 and right CON	Sports club/gym attendance (group 2)	0.1185	0.0423578	0.194642	0.00229065	0.347924
Connectivity between CN and AN2	Cumulative activity	0.0243105	0.00863332	0.0399877	0.0023758	0.347924
Connectivity between posterior DMN2 and AN2	Sports club/gym attendance (group 3)	0.0827479	0.0292687	0.136227	0.00242885	0.347924
Connectivity between anterior DMN and lateral VN	Pubs/social clubs (group 2)	0.127976	0.0438095	0.212144	0.00288615	0.347924
Connectivity between right FPN and anterior DMN2	Sports club/gym attendance (group 3)	-0.0820884	-0.136081	-0.0280961	0.00288864	0.347924
Connectivity between AN and BGN	Cumulative activity	-0.0239606	-0.0397796	-0.00814162	0.00299561	0.347924
Connectivity between lateral VN and AN2	Sports club/gym attendance (group 3)	-0.0802594	-0.13335	-0.0271689	0.00305197	0.347924
Connectivity between medial VN and right CON	Pubs/social clubs (group 3)	0.091112	0.0306929	0.151531	0.00312548	0.349707
Volume of accumbens average	Leisure-time computer use (group 3)	0.18092	0.0561801	0.30566	0.00447943	0.374596
Volume of GM in frontal operculum cortex average	Cumulative activity	0.0196262	0.00598227	0.0332701	0.00481861	0.374596
Weighted mean FA in tract anterior thalamic radiation average	Adult educational classes (group 3)	-0.154234	-0.261499	-0.0469683	0.0048359	0.374596
Weighted mean MD in tract posterior thalamic radiation average	Religious activities (group 2)	0.174749	0.0533937	0.296105	0.00477409	0.374596
Connectivity between AN and lateral VN2	Sports club/gym attendance (group 3)	0.0805313	0.026455	0.134608	0.00351912	0.374596
Connectivity between SMN2 and anterior DMN2	Family and friend visits (group 1)	0.162969	0.0533283	0.272609	0.00358204	0.374596
Connectivity between posterior DMN and precuneus/PCC DMN	Pubs/social clubs (group 1)	-0.122249	-0.204939	-0.0395589	0.00376575	0.374596
Connectivity between SMN and SMN3	Sports club/gym attendance (group 3)	-0.0771611	-0.129441	-0.0248812	0.00382438	0.374596
Connectivity between posterior DMN and precuneus/PCC DMN	Religious activities (group 3)	0.0858474	0.0274692	0.144226	0.00395471	0.374596
Connectivity between anterior DMN and lateral VN	Family and friend visits (group 2)	-0.153978	-0.258713	-0.0492431	0.00396384	0.374596
Connectivity between AN2 and right CON	Family and friend visits (group 3)	-0.117292	-0.197336	-0.0372489	0.00408394	0.374596
Connectivity between SMN2 and right CON	Family and friend visits (group 1)	0.16006	0.0507224	0.269398	0.00412085	0.374596
Connectivity between left CON and anterior DMN2	Sports club/gym attendance (group 3)	0.0791352	0.0250518	0.133219	0.0041387	0.374596
Connectivity between left FPN and BGN	Adult educational classes (group 2)	-0.142414	-0.239777	-0.0450512	0.00415133	0.374596
Connectivity between anterior DMN and precuneus/PCC DMN	Sports club/gym attendance (group 3)	0.077193	0.024407	0.129979	0.00415999	0.374596
Connectivity between posterior DMN2 and SMN3	Sports club/gym attendance (group 3)	0.0783894	0.0245884	0.13219	0.00429984	0.374596
Connectivity between left FPN and ECN	Cumulative activity	-0.0229657	-0.0387699	-0.00716148	0.00440404	0.374596
Connectivity between ECN and precuneus/PCC DMN	Sports club/gym attendance (group 2)	-0.1099	-0.185651	-0.0341484	0.00446795	0.374596
Connectivity between anterior DMN and posterior DMN	Pubs/social clubs (group 1)	-0.120204	-0.203063	-0.0373455	0.00447017	0.374596
Connectivity between SMN2 and anterior DMN2	Sports club/gym attendance (group 3)	0.0783481	0.0243196	0.132377	0.00448634	0.374596
Connectivity between left CON and anterior DMN2	Leisure-time computer use (group 3)	-0.206578	-0.34928	-0.0638766	0.00455582	0.374596
Connectivity between SMN3 and CN	Cumulative activity	0.0223374	0.00688316	0.0377916	0.0046186	0.374596
Connectivity between AN and BGN	Family and friend visits (group 3)	-0.115187	-0.194963	-0.035412	0.00466107	0.374596
Connectivity between SMN and posterior DMN2	Pubs/social clubs (group 1)	0.120158	0.0368462	0.203469	0.00470765	0.374596
Connectivity between SMN2 and SMN3	Cumulative activity	0.022531	0.00680881	0.0382531	0.00497931	0.380823
Volume of GM in iiv cerebellum average	Cumulative activity	-0.0207267	-0.0352185	-0.00623485	0.00506598	0.381828
Connectivity between left CON and right CON	Adult educational classes (group 2)	-0.138555	-0.235547	-0.0415631	0.00511885	0.381828
Volume of GM in precentral gyrus average	Leisure-time computer use (group 2)	0.178051	0.0519516	0.30415	0.00565608	0.389051
Connectivity between CN and AN2	Sports club/gym attendance (group 3)	0.0760385	0.0225897	0.129487	0.0053044	0.389051
Connectivity between BGN and precuneus/PCC DMN	Adult educational classes (group 1)	-0.122518	-0.208817	-0.0362184	0.00540009	0.389051
Connectivity between posterior DMN2 and AN2	Family and friend visits (group 3)	-0.112235	-0.191342	-0.0331278	0.00542989	0.389051
Connectivity between anterior DMN and AN	Adult educational classes (group 3)	0.159256	0.0465404	0.271971	0.00562521	0.389051
Connectivity between anterior DMN2 and CN	Family and friend visits (group 3)	-0.112104	-0.191494	-0.0327143	0.0056533	0.389051
Connectivity between anterior DMN2 and right CON	Family and friend visits (group 3)	-0.111611	-0.190673	-0.0325488	0.00566642	0.389051
Connectivity between precuneus/PCC DMN and right CON	Sports club/gym attendance (group 3)	-0.0761882	-0.130355	-0.0220216	0.00584358	0.393489
Connectivity between medial VN2 and lateral VN2	Sports club/gym attendance (group 3)	0.0754741	0.0217959	0.129152	0.0058613	0.393489
Connectivity between medial VN2 and SMN2	Cumulative activity	0.022104	0.00629608	0.037912	0.00613952	0.404944
Connectivity between posterior DMN and BGN	Pubs/social clubs (group 1)	0.116623	0.0331757	0.200071	0.00616597	0.404944
Volume of GM in supracalcarine cortex average	Religious activities (group 2)	-0.164268	-0.282111	-0.0464253	0.00629962	0.409272
Connectivity between medial VN and lateral VN2	Pubs/social clubs (group 3)	0.0837513	0.0234856	0.144017	0.00646094	0.412346
Connectivity between left CON and anterior DMN2	Adult educational classes (group 1)	-0.119628	-0.205847	-0.0334087	0.00654627	0.412346
Connectivity between CN and AN2	Adult educational classes (group 2)	0.133315	0.0372215	0.229408	0.00655168	0.412346
Connectivity between SMN3 and right CON	Family and friend visits (group 1)	0.150245	0.0416936	0.258796	0.00667906	0.41603
Volume of GM in v cerebellum average	Family and friend visits (group 3)	-0.0972224	-0.167943	-0.0265019	0.00705744	0.419075
Volume of pallidum average	Pubs/social clubs (group 3)	-0.0730529	-0.126177	-0.0199292	0.00704064	0.419075
Connectivity between right FPN and AN2	Pubs/social clubs (group 3)	0.0826759	0.0226235	0.142728	0.00697547	0.419075
Connectivity between medial VN2 and AN2	Cumulative activity	0.0218151	0.00596933	0.0376609	0.00697605	0.419075
Connectivity between AN and AN2	Cumulative activity	0.0215991	0.00587769	0.0373206	0.00709392	0.419075
Connectivity between BGN and precuneus/PCC DMN	Religious activities (group 2)	-0.184997	-0.319892	-0.0501016	0.00719679	0.419075
Connectivity between SMN and right CON	Sports club/gym attendance (group 3)	-0.0739427	-0.127876	-0.02001	0.00721348	0.419075
Volume of GM in occipital fusiform gyrus average	Pubs/social clubs (group 2)	0.0957942	0.0256197	0.165969	0.0074683	0.425693
Connectivity between lateral VN and SMN2	Cumulative activity	-0.0215925	-0.0374085	-0.00577639	0.00746233	0.425693
Weighted mean FA in tract inferior longitudinal fasciculus average	Religious activities (group 2)	-0.175429	-0.30483	-0.0460279	0.00788807	0.430879
Connectivity between right FPN and precuneus/PCC DMN	Pubs/social clubs (group 1)	-0.113009	-0.196107	-0.0299123	0.00769467	0.430879
Connectivity between left FPN and SMN2	Sports club/gym attendance (group 3)	0.0732057	0.019201	0.12721	0.00789529	0.430879
Connectivity between CN and right CON	Pubs/social clubs (group 2)	-0.113576	-0.197385	-0.0297662	0.00791262	0.430879
Connectivity between SMN2 and ECN	Adult educational classes (group 2)	0.130364	0.0341612	0.226567	0.00791585	0.430879
Volume of thalamus average	Sports club/gym attendance (group 3)	0.0501869	0.0129548	0.0874191	0.00825072	0.444318
Connectivity between anterior DMN and lateral VN	Sports club/gym attendance (group 3)	-0.0728955	-0.12705	-0.0187406	0.00834136	0.444318
Connectivity between SMN2 and CN	Cumulative activity	0.0210562	0.00539316	0.0367192	0.00842515	0.444318
Connectivity between lateral VN and BGN	Religious activities (group 2)	0.181448	0.0464091	0.316487	0.0084569	0.444318
Volume of GM in precuneous cortex average	Family and friend visits (group 1)	0.110012	0.0278401	0.192184	0.00869744	0.453016
Volume of GM in angular gyrus average	Family and friend visits (group 1)	0.128761	0.0314915	0.226031	0.00947979	0.457132
Volume of GM in inferior temporal gyrus temporooccipital part average	Pubs/social clubs (group 3)	0.0680871	0.016932	0.119242	0.00909586	0.457132
Volume of GM in lateral occipital cortex superior division average	Religious activities (group 2)	0.139801	0.0341538	0.245448	0.00950539	0.457132
Volume of GM in ventral striatum average	Pubs/social clubs (group 3)	-0.0669663	-0.117637	-0.0162953	0.00959731	0.457132
Volume of GM in vermis viib cerebellum average	Cumulative activity	-0.0200925	-0.0352387	-0.0049464	0.00932836	0.457132
Weighted mean MD in tract acoustic radiation average	Leisure-time computer use (group 3)	0.188245	0.0470191	0.329471	0.0089953	0.457132
Weighted mean MD in tract uncinate fasciculus average	Pubs/social clubs (group 3)	0.0753284	0.0187564	0.1319	0.00906703	0.457132
Connectivity between anterior DMN2 and BGN	Religious activities (group 3)	0.0779807	0.0193286	0.136633	0.00917149	0.457132
Connectivity between SMN and CN	Sports club/gym attendance (group 3)	0.07156	0.0176582	0.125462	0.00927416	0.457132
Connectivity between SMN3 and left CON	Sports club/gym attendance (group 3)	-0.0712926	-0.12502	-0.0175655	0.00930911	0.457132
Connectivity between medial VN2 and left CON	Pubs/social clubs (group 3)	-0.0793776	-0.139449	-0.019306	0.0096087	0.457132
Weighted mean FA in tract inferior frontooccipital fasciculus average	Religious activities (group 2)	-0.171722	-0.301833	-0.0416105	0.00969517	0.457642
Weighted mean MD in tract forceps major average	Pubs/social clubs (group 2)	-0.110348	-0.194286	-0.0264108	0.00998318	0.460446
Connectivity between lateral VN and AN	Religious activities (group 2)	-0.177731	-0.31266	-0.0428021	0.00983871	0.460446
Connectivity between SMN and posterior DMN2	Leisure-time computer use (group 3)	-0.187835	-0.33071	-0.0449602	0.0099813	0.460446
Connectivity between lateral VN and SMN2	Religious activities (group 3)	-0.076905	-0.135476	-0.0183339	0.0100757	0.461191
Global GM volume	Pubs/social clubs (group 3)	-0.0381505	-0.0674718	-0.00882924	0.010775	0.465118
Volume of GM in paracingulate gyrus average	Family and friend visits (group 1)	0.115439	0.0270933	0.203785	0.0104434	0.465118
Volume of GM in paracingulate gyrus average	Family and friend visits (group 3)	0.0840797	0.019677	0.148483	0.010511	0.465118
Volume of GM in vi cerebellum average	Pubs/social clubs (group 2)	0.0926959	0.0213124	0.164079	0.0109309	0.465118
Weighted mean MD in tract middle cerebellar peduncle average	Family and friend visits (group 2)	-0.131849	-0.233336	-0.0303621	0.0108936	0.465118
Connectivity between SMN and medial VN2	Adult educational classes (group 1)	-0.112475	-0.198595	-0.0263551	0.0104816	0.465118
Connectivity between medial VN and medial VN2	Adult educational classes (group 1)	-0.112195	-0.198316	-0.0260735	0.0106766	0.465118
Connectivity between SMN3 and anterior DMN2	Leisure-time computer use (group 3)	-0.18497	-0.32732	-0.04262	0.0108795	0.465118
Connectivity between SMN and posterior DMN2	Religious activities (group 2)	-0.17512	-0.310052	-0.0401872	0.0109758	0.465118
Connectivity between right FPN and right CON	Sports club/gym attendance (group 3)	-0.0701431	-0.124194	-0.0160919	0.0109829	0.465118
Connectivity between anterior DMN and posterior DMN	Family and friend visits (group 1)	-0.141744	-0.251004	-0.0324836	0.0110083	0.465118
Volume of GM in v cerebellum average	Family and friend visits (group 1)	-0.125114	-0.222126	-0.0281015	0.0114884	0.46974
Connectivity between left CON and BGN	Religious activities (group 3)	-0.0759507	-0.134779	-0.0171224	0.0113998	0.46974
Connectivity between anterior DMN and posterior DMN	Religious activities (group 3)	0.0755025	0.0170006	0.134004	0.011429	0.46974
Connectivity between medial VN and posterior DMN	Adult educational classes (group 3)	-0.145251	-0.257842	-0.0326598	0.0114625	0.46974
Connectivity between posterior DMN2 and right CON	Family and friend visits (group 2)	0.135023	0.0303044	0.239741	0.0115064	0.46974
Volume of GM in viiia cerebellum average	Pubs/social clubs (group 3)	-0.0687856	-0.122394	-0.0151776	0.011915	0.476758
Weighted mean MD in tract cingulate gyrus part of cingulum average	Adult educational classes (group 3)	0.141265	0.0312679	0.251262	0.0118397	0.476758
Connectivity between right FPN and SMN2	Cumulative activity	0.0203706	0.00450649	0.0362346	0.0118524	0.476758
Global WM volume	Sports club/gym attendance (group 3)	0.0347051	0.00761972	0.0617904	0.0120346	0.478374
Volume of GM in brainstem average	Sports club/gym attendance (group 3)	0.0620918	0.0135666	0.110617	0.0121515	0.479867
Volume of GM in inferior frontal gyrus pars triangularis average	Leisure-time computer use (group 3)	0.166553	0.0359959	0.29711	0.0124146	0.483929
Connectivity between right FPN and right CON	Sports club/gym attendance (group 1)	-0.096173	-0.171512	-0.0208342	0.0123577	0.483929
Connectivity between anterior DMN and right CON	Sports club/gym attendance (group 3)	-0.0687308	-0.122731	-0.0147305	0.0126168	0.488657
Weighted mean FA in tract acoustic radiation average	Leisure-time computer use (group 1)	-0.251348	-0.449892	-0.0528037	0.0131006	0.504164
Volume of GM in vermis vi cerebellum average	Pubs/social clubs (group 3)	-0.0720984	-0.129339	-0.0148582	0.013567	0.505999
Connectivity between posterior DMN and SMN3	Adult educational classes (group 2)	-0.122619	-0.219639	-0.0256003	0.0132515	0.505999
Connectivity between medial VN2 and AN	Religious activities (group 2)	0.167739	0.034751	0.300727	0.0134388	0.505999
Connectivity between medial VN and ECN	Adult educational classes (group 3)	0.141084	0.029185	0.252983	0.0134752	0.505999
Connectivity between AN2 and right CON	Pubs/social clubs (group 1)	-0.104917	-0.188201	-0.0216332	0.0135538	0.505999
Volume of accumbens average	Sports club/gym attendance (group 1)	-0.0821836	-0.148107	-0.0162604	0.0145568	0.508986
Global GM volume	Leisure-time computer use (group 3)	0.086451	0.0170137	0.155888	0.0146865	0.508986
Volume of GM in cingulate gyrus posterior division average	Leisure-time computer use (group 1)	0.180744	0.0355814	0.325907	0.0146792	0.508986
Volume of GM in planum polare average	Sports club/gym attendance (group 3)	-0.0531323	-0.0957692	-0.0104953	0.0145966	0.508986
Volume of GM in precuneous cortex average	Religious activities (group 3)	-0.0548845	-0.0988879	-0.010881	0.0145079	0.508986
Volume of GM in temporal pole average	Leisure-time computer use (group 3)	0.140148	0.027423	0.252873	0.0148265	0.508986
Volume of GM in viib cerebellum average	Religious activities (group 2)	0.152014	0.0297751	0.274253	0.0148017	0.508986
Weighted mean MD in tract superior thalamic radiation average	Family and friend visits (group 2)	-0.1207	-0.217441	-0.0239582	0.0144785	0.508986
Connectivity between right FPN and BGN	Cumulative activity	-0.0197152	-0.0354711	-0.0039594	0.0141942	0.508986
Connectivity between lateral VN and anterior DMN2	Sports club/gym attendance (group 1)	0.0944082	0.0189416	0.169875	0.0142177	0.508986
Connectivity between SMN2 and CN	Sports club/gym attendance (group 3)	0.0667423	0.0133484	0.120136	0.0142948	0.508986
Connectivity between medial VN2 and posterior DMN2	Family and friend visits (group 3)	0.0999951	0.0199106	0.18008	0.0144025	0.508986
Connectivity between posterior DMN and posterior DMN2	Adult educational classes (group 3)	-0.139972	-0.252171	-0.0277741	0.0144868	0.508986
Connectivity between SMN2 and SMN3	Adult educational classes (group 1)	0.106541	0.0210963	0.191986	0.0145377	0.508986
Volume of GM in vi cerebellum average	Pubs/social clubs (group 3)	-0.0634127	-0.11459	-0.0122349	0.0151677	0.517759
Connectivity between SMN and CN	Family and friend visits (group 3)	0.0986854	0.0189442	0.178427	0.0152906	0.519023
Connectivity between medial VN2 and precuneus/PCC DMN	Religious activities (group 2)	-0.166694	-0.30167	-0.0317181	0.0155049	0.522829
Connectivity between AN2 and lateral VN2	Sports club/gym attendance (group 3)	0.0666771	0.0126501	0.120704	0.0155759	0.522829
Connectivity between left FPN and AN2	Adult educational classes (group 1)	-0.106363	-0.192619	-0.0201069	0.0156629	0.522848
Volume of GM in vermis vi cerebellum average	Pubs/social clubs (group 2)	0.0976698	0.0178304	0.177509	0.0165065	0.524906
Weighted mean FA in tract parahippocampal part of cingulum average	Pubs/social clubs (group 3)	0.0721775	0.0133787	0.130976	0.0161391	0.524906
Weighted mean MD in tract inferior longitudinal fasciculus average	Family and friend visits (group 1)	-0.12634	-0.229082	-0.0235974	0.0159545	0.524906
Connectivity between left CON and anterior DMN2	Leisure-time computer use (group 2)	-0.196942	-0.357293	-0.0365912	0.0160819	0.524906
Connectivity between medial VN and lateral VN2	Pubs/social clubs (group 1)	0.102157	0.0189149	0.185399	0.0161655	0.524906
Connectivity between SMN3 and BGN	Adult educational classes (group 1)	-0.10415	-0.189072	-0.0192281	0.0162355	0.524906
Connectivity between posterior DMN and lateral VN2	Sports club/gym attendance (group 3)	-0.0662669	-0.120403	-0.0121305	0.016441	0.524906
Connectivity between precuneus/PCC DMN and right CON	Leisure-time computer use (group 1)	0.24846	0.0454718	0.451449	0.0164463	0.524906
Connectivity between posterior DMN2 and lateral VN2	Cumulative activity	0.0193612	0.00353898	0.0351834	0.0164762	0.524906
Volume of GM in central opercular cortex average	Adult educational classes (group 1)	0.0790056	0.0139752	0.144036	0.0172651	0.52847
Volume of GM in crus i cerebellum average	Pubs/social clubs (group 3)	-0.0637556	-0.116488	-0.0110228	0.0178117	0.52847
Volume of GM in frontal pole average	Adult educational classes (group 2)	-0.0781977	-0.143359	-0.0130364	0.0186757	0.52847
Volume of GM in iiv cerebellum average	Family and friend visits (group 3)	-0.0890186	-0.162078	-0.0159597	0.0169422	0.52847
Volume of GM in inferior frontal gyrus pars opercularis average	Sports club/gym attendance (group 1)	0.0827624	0.0146664	0.150858	0.0172215	0.52847
Volume of GM in inferior temporal gyrus anterior division average	Leisure-time computer use (group 1)	0.216626	0.036538	0.396714	0.0183995	0.52847
Volume of GM in middle temporal gyrus anterior division average	Cumulative activity	0.0162885	0.00275957	0.0298175	0.0182944	0.52847
Volume of GM in postcentral gyrus average	Family and friend visits (group 3)	0.0790612	0.0131972	0.144925	0.0186456	0.52847
Weighted mean FA in tract acoustic radiation average	Leisure-time computer use (group 2)	-0.189566	-0.346671	-0.0324604	0.0180409	0.52847
Weighted mean FA in tract forceps major average	Family and friend visits (group 2)	0.12678	0.022161	0.231399	0.0175496	0.52847
Weighted mean MD in tract forceps minor average	Religious activities (group 2)	0.156709	0.0263545	0.287064	0.018469	0.52847
Weighted mean MD in tract inferior frontooccipital fasciculus average	Adult educational classes (group 2)	0.108384	0.0182937	0.198475	0.0183831	0.52847
Weighted mean MD in tract middle cerebellar peduncle average	Family and friend visits (group 1)	-0.129774	-0.236248	-0.0232997	0.0169078	0.52847
Connectivity between lateral VN2 and precuneus/PCC DMN	Leisure-time computer use (group 2)	0.194643	0.0346403	0.354645	0.0171191	0.52847
Connectivity between SMN and precuneus/PCC DMN	Adult educational classes (group 3)	-0.13736	-0.250302	-0.0244175	0.0171469	0.52847
Connectivity between right FPN and posterior DMN	Sports club/gym attendance (group 1)	-0.0914285	-0.166865	-0.0159923	0.0175336	0.52847
Connectivity between left FPN and AN	Leisure-time computer use (group 3)	-0.172777	-0.315605	-0.0299477	0.017751	0.52847
Connectivity between lateral VN and SMN2	Family and friend visits (group 3)	-0.0962672	-0.176029	-0.0165051	0.018011	0.52847
Connectivity between SMN and medial VN2	Pubs/social clubs (group 3)	0.0725205	0.0123172	0.132724	0.0182347	0.52847
Connectivity between lateral VN and SMN2	Family and friend visits (group 1)	-0.131758	-0.241173	-0.0223431	0.0182722	0.52847
Connectivity between medial VN and posterior DMN2	Religious activities (group 3)	-0.0703072	-0.128793	-0.0118211	0.0184747	0.52847
Connectivity between AN and AN2	Leisure-time computer use (group 3)	0.169916	0.0285461	0.311286	0.0184934	0.52847
Connectivity between SMN3 and right CON	Pubs/social clubs (group 3)	-0.0715471	-0.131171	-0.0119229	0.0186851	0.52847
Connectivity between SMN2 and ECN	Sports club/gym attendance (group 3)	0.0642045	0.0106845	0.117724	0.0187177	0.52847
Connectivity between posterior DMN2 and SMN2	Cumulative activity	0.0189914	0.00313252	0.0348503	0.0189269	0.53189
Volume of GM in intracalcarine cortex average	Pubs/social clubs (group 2)	0.0907457	0.0148895	0.166602	0.0190505	0.532885
Volume of amygdala average	Religious activities (group 3)	-0.0644531	-0.118783	-0.010123	0.0200707	0.534326
Volume of amygdala average	Sports club/gym attendance (group 3)	0.0593058	0.00931073	0.109301	0.0200802	0.534326
Volume of GM in angular gyrus average	Adult educational classes (group 1)	-0.0901755	-0.166591	-0.0137596	0.020736	0.534326
Volume of GM in inferior temporal gyrus anterior division average	Sports club/gym attendance (group 2)	-0.0802376	-0.148176	-0.0122992	0.0206314	0.534326
Volume of GM in insular cortex average	Leisure-time computer use (group 2)	0.134336	0.0203385	0.248333	0.0209145	0.534326
Volume of GM in superior temporal gyrus anterior division average	Religious activities (group 2)	-0.135739	-0.251149	-0.0203291	0.0211618	0.534326
Volume of thalamus average	Leisure-time computer use (group 3)	0.117096	0.0188148	0.215376	0.019541	0.534326
Weighted mean MD in tract forceps major average	Family and friend visits (group 1)	-0.129888	-0.239495	-0.020281	0.0202062	0.534326
Connectivity between AN and ECN	Family and friend visits (group 2)	-0.124984	-0.229782	-0.0201849	0.0194219	0.534326
Connectivity between left FPN and precuneus/PCC DMN	Adult educational classes (group 2)	0.115444	0.018512	0.212376	0.0195881	0.534326
Connectivity between SMN2 and left CON	Family and friend visits (group 1)	-0.130455	-0.240083	-0.0208272	0.0196908	0.534326
Connectivity between AN2 and right CON	Family and friend visits (group 2)	-0.124435	-0.229093	-0.0197775	0.0197949	0.534326
Connectivity between ECN and lateral VN2	Sports club/gym attendance (group 1)	0.0885944	0.0140274	0.163161	0.0198835	0.534326
Connectivity between medial VN and ECN	Adult educational classes (group 2)	-0.114581	-0.211159	-0.0180024	0.0200624	0.534326
Connectivity between anterior DMN2 and ECN	Sports club/gym attendance (group 3)	-0.0637242	-0.117528	-0.00992073	0.0202743	0.534326
Connectivity between SMN3 and precuneus/PCC DMN	Cumulative activity	0.0187185	0.00289914	0.0345378	0.0203932	0.534326
Connectivity between posterior DMN2 and right CON	Family and friend visits (group 3)	0.0945056	0.0144158	0.174595	0.0207431	0.534326
Connectivity between anterior DMN2 and right CON	Family and friend visits (group 1)	-0.127815	-0.236269	-0.0193599	0.0209042	0.534326
Connectivity between posterior DMN2 and AN2	Family and friend visits (group 2)	-0.121827	-0.225261	-0.0183929	0.0209786	0.534326
Connectivity between AN2 and right CON	Adult educational classes (group 3)	0.132784	0.0200384	0.245531	0.0209887	0.534326
Connectivity between anterior DMN and medial VN	Family and friend visits (group 1)	0.129124	0.0194858	0.238761	0.0209888	0.534326
Connectivity between right FPN and left FPN	Religious activities (group 1)	-0.177397	-0.328351	-0.0264427	0.0212691	0.534326
Connectivity between SMN3 and right CON	Sports club/gym attendance (group 1)	0.0876404	0.0130611	0.16222	0.0212734	0.534326
Connectivity between right FPN and SMN2	Pubs/social clubs (group 3)	0.0708058	0.0105385	0.131073	0.021303	0.534326
Connectivity between SMN and anterior DMN2	Pubs/social clubs (group 3)	0.0705295	0.0104782	0.130581	0.0213446	0.534326
Connectivity between anterior DMN and right FPN	Religious activities (group 3)	0.068794	0.0101947	0.127393	0.0214013	0.534326
Weighted mean FA in tract forceps major average	Pubs/social clubs (group 2)	0.098402	0.0143223	0.182482	0.021807	0.539991
Connectivity between SMN2 and ECN	Religious activities (group 3)	-0.0680074	-0.126114	-0.00990076	0.0218016	0.539991
Connectivity between lateral VN and CN	Cumulative activity	0.0183854	0.00264036	0.0341304	0.0221068	0.54354
Connectivity between medial VN2 and right CON	Sports club/gym attendance (group 2)	0.0893609	0.0128182	0.165904	0.022133	0.54354
Connectivity between lateral VN and lateral VN2	Adult educational classes (group 1)	-0.0995795	-0.184931	-0.0142282	0.0222202	0.54354
Volume of GM in inferior temporal gyrus anterior division average	Leisure-time computer use (group 3)	0.147527	0.0207105	0.274344	0.0226114	0.544295
Volume of GM in intracalcarine cortex average	Family and friend visits (group 1)	0.115248	0.0161923	0.214304	0.0225933	0.544295
Weighted mean MD in tract posterior thalamic radiation average	Sports club/gym attendance (group 1)	0.0790433	0.0111464	0.14694	0.022512	0.544295
Connectivity between AN2 and right CON	Family and friend visits (group 1)	-0.127939	-0.23774	-0.0181378	0.0223941	0.544295
Connectivity between SMN2 and AN	Religious activities (group 3)	0.0678358	0.00937964	0.126292	0.0229452	0.548925
Connectivity between left FPN and precuneus/PCC DMN	Family and friend visits (group 1)	-0.126919	-0.236321	-0.0175169	0.0229854	0.548925
Volume of GM in crus ii cerebellum average	Religious activities (group 2)	0.141471	0.0194149	0.263526	0.0231093	0.549711
Connectivity between SMN and posterior DMN2	Adult educational classes (group 1)	-0.099942	-0.186289	-0.0135951	0.0233017	0.550168
Connectivity between lateral VN2 and precuneus/PCC DMN	Leisure-time computer use (group 3)	0.1648	0.0224085	0.307191	0.0233107	0.550168
Connectivity between CN and ECN	Religious activities (group 1)	-0.1731	-0.322985	-0.0232146	0.0236094	0.55505
Connectivity between lateral VN and AN2	Pubs/social clubs (group 3)	0.0682394	0.00906716	0.127412	0.0238091	0.557577
Connectivity between SMN and posterior DMN2	Sports club/gym attendance (group 2)	0.0880608	0.0115181	0.164604	0.0241459	0.561161
Connectivity between medial VN2 and BGN	Family and friend visits (group 1)	-0.126486	-0.236429	-0.0165424	0.0241479	0.561161
Weighted mean MD in tract anterior thalamic radiation average	Sports club/gym attendance (group 1)	0.0747521	0.00972572	0.139778	0.0242585	0.561571
Volume of GM in occipital pole average	Family and friend visits (group 2)	0.0994491	0.0128224	0.186076	0.0244502	0.563848
Volume of GM in cingulate gyrus posterior division average	Religious activities (group 2)	0.110526	0.0139884	0.207064	0.0248408	0.56424
Weighted mean FA in tract superior thalamic radiation average	Leisure-time computer use (group 3)	-0.159083	-0.297819	-0.0203469	0.0246199	0.56424
Connectivity between CN and precuneus/PCC DMN	Pubs/social clubs (group 2)	0.0941523	0.0119616	0.176343	0.0247609	0.56424
Connectivity between posterior DMN2 and CN	Sports club/gym attendance (group 2)	-0.0859266	-0.160942	-0.010911	0.0247717	0.56424
Volume of GM in temporal fusiform cortex posterior division average	Sports club/gym attendance (group 2)	-0.068628	-0.128687	-0.0085691	0.0251224	0.56818
Connectivity between SMN2 and anterior DMN2	Family and friend visits (group 3)	0.0912801	0.0113537	0.171206	0.0252023	0.56818
Connectivity between left FPN and CN	Adult educational classes (group 2)	-0.110334	-0.207141	-0.013527	0.0255	0.572755
Weighted mean MD in tract uncinate fasciculus average	Religious activities (group 3)	-0.0628222	-0.117996	-0.00764864	0.0256426	0.573825
Volume of GM in heschls gyrus includes h1 and h2 average	Family and friend visits (group 1)	0.100484	0.01204	0.188928	0.0259681	0.576836
Connectivity between SMN and ECN	Cumulative activity	-0.0179457	-0.0337401	-0.00215129	0.0259583	0.576836
Volume of caudate average	Leisure-time computer use (group 3)	0.132482	0.0150302	0.249934	0.0270568	0.578312
Volume of GM in frontal orbital cortex average	Adult educational classes (group 2)	-0.082279	-0.154876	-0.00968213	0.0263323	0.578312
Volume of GM in frontal orbital cortex average	Family and friend visits (group 1)	0.0918913	0.0099545	0.173828	0.0279489	0.578312
Volume of GM in heschls gyrus includes h1 and h2 average	Family and friend visits (group 2)	0.0947363	0.0104349	0.179038	0.0276306	0.578312
Volume of GM in insular cortex average	Sports club/gym attendance (group 3)	0.0435188	0.00505179	0.0819859	0.0266041	0.578312
Volume of hippocampus average	Leisure-time computer use (group 2)	0.159383	0.0176853	0.301081	0.0274887	0.578312
Connectivity between left FPN and right CON	Adult educational classes (group 2)	0.109124	0.0126328	0.205616	0.0266585	0.578312
Connectivity between anterior DMN and medial VN2	Pubs/social clubs (group 2)	0.0952231	0.0109774	0.179469	0.0267417	0.578312
Connectivity between posterior DMN and precuneus/PCC DMN	Pubs/social clubs (group 3)	-0.0676345	-0.127501	-0.00776831	0.0268144	0.578312
Connectivity between left FPN and medial VN2	Religious activities (group 1)	0.170951	0.0195535	0.322349	0.0268964	0.578312
Connectivity between medial VN and BGN	Religious activities (group 3)	0.0661685	0.00749597	0.124841	0.0270853	0.578312
Connectivity between anterior DMN and SMN	Religious activities (group 2)	0.151392	0.0170548	0.28573	0.0271948	0.578312
Connectivity between left CON and precuneus/PCC DMN	Adult educational classes (group 1)	0.096735	0.0108815	0.182589	0.0272234	0.578312
Connectivity between CN and precuneus/PCC DMN	Religious activities (group 2)	-0.148453	-0.280229	-0.0166776	0.0272486	0.578312
Connectivity between medial VN and left FPN	Sports club/gym attendance (group 2)	-0.0858264	-0.162105	-0.00954837	0.027438	0.578312
Connectivity between medial VN and left CON	Adult educational classes (group 1)	-0.0974411	-0.18405	-0.0108325	0.0274522	0.578312
Connectivity between anterior DMN2 and BGN	Family and friend visits (group 1)	0.123246	0.0136977	0.232795	0.0274574	0.578312
Connectivity between SMN and BGN	Cumulative activity	0.017693	0.0019321	0.033454	0.0277959	0.578312
Connectivity between posterior DMN2 and precuneus/PCC DMN	Family and friend visits (group 1)	-0.121289	-0.229375	-0.0132031	0.0278563	0.578312
Connectivity between lateral VN and posterior DMN2	Leisure-time computer use (group 2)	0.177346	0.0193038	0.335389	0.0278578	0.578312
Connectivity between SMN2 and CN	Adult educational classes (group 3)	0.124485	0.0132334	0.235737	0.0283054	0.583691
Connectivity between right FPN and right CON	Pubs/social clubs (group 3)	-0.0673263	-0.127581	-0.00707208	0.0285291	0.585541
Connectivity between right FPN and medial VN2	Sports club/gym attendance (group 1)	0.0842698	0.00875655	0.159783	0.0287301	0.585541
Connectivity between anterior DMN and left FPN	Pubs/social clubs (group 1)	0.093045	0.00961675	0.176473	0.028829	0.585541
Connectivity between anterior DMN and BGN	Pubs/social clubs (group 2)	-0.0934431	-0.177263	-0.00962292	0.0288958	0.585541
Connectivity between posterior DMN and lateral VN2	Adult educational classes (group 3)	-0.125722	-0.238518	-0.012927	0.0289244	0.585541
Connectivity between SMN and CN	Family and friend visits (group 1)	0.121883	0.0124966	0.231269	0.0289766	0.585541
Connectivity between SMN2 and right CON	Sports club/gym attendance (group 3)	0.0599121	0.00603602	0.113788	0.0292961	0.590023
Volume of GM in crus ii cerebellum average	Religious activities (group 3)	-0.0591312	-0.112356	-0.00590659	0.0294506	0.591164
Volume of GM in lateral occipital cortex inferior division average	Adult educational classes (group 3)	0.101364	0.00989687	0.192831	0.0298581	0.591916
Volume of GM in occipital fusiform gyrus average	Religious activities (group 2)	0.124576	0.0120811	0.237071	0.0299779	0.591916
Weighted mean FA in tract medial lemniscus average	Family and friend visits (group 1)	-0.117277	-0.223016	-0.0115383	0.0297225	0.591916
Connectivity between ECN and precuneus/PCC DMN	Sports club/gym attendance (group 1)	-0.0829127	-0.157622	-0.00820317	0.0296225	0.591916
Connectivity between SMN3 and precuneus/PCC DMN	Sports club/gym attendance (group 3)	0.0597328	0.00581747	0.113648	0.0299026	0.591916
Connectivity between SMN3 and precuneus/PCC DMN	Adult educational classes (group 2)	0.107194	0.0102327	0.204156	0.0302546	0.59341
Connectivity between left FPN and ECN	Leisure-time computer use (group 1)	-0.222983	-0.424892	-0.0210736	0.0304287	0.59341
Connectivity between medial VN2 and SMN3	Cumulative activity	0.017489	0.001634	0.0333441	0.0306265	0.59341
Connectivity between AN and BGN	Family and friend visits (group 1)	-0.120694	-0.230127	-0.0112603	0.030651	0.59341
Connectivity between lateral VN and AN	Religious activities (group 3)	-0.064889	-0.123727	-0.00605089	0.0306596	0.59341
Connectivity between anterior DMN and BGN	Adult educational classes (group 1)	0.0948086	0.00883644	0.180781	0.0306682	0.59341
Connectivity between SMN3 and BGN	Religious activities (group 2)	-0.146316	-0.279053	-0.0135792	0.0307411	0.59341
Volume of GM in inferior temporal gyrus temporooccipital part average	Adult educational classes (group 3)	0.104763	0.00912108	0.200405	0.0318074	0.596834
Volume of GM in middle temporal gyrus anterior division average	Religious activities (group 3)	0.0549625	0.0048469	0.105078	0.0315978	0.596834
Volume of GM in parahippocampal gyrus anterior division average	Cumulative activity	0.0139374	0.00122733	0.0266476	0.0316212	0.596834
Connectivity between posterior DMN2 and ECN	Cumulative activity	-0.0174644	-0.0333476	-0.00158123	0.0311599	0.596834
Connectivity between medial VN2 and BGN	Family and friend visits (group 3)	-0.0880116	-0.168159	-0.00786448	0.0313795	0.596834
Connectivity between left FPN and AN	Adult educational classes (group 2)	0.106791	0.00945886	0.204124	0.0315255	0.596834
Connectivity between anterior DMN and lateral VN	Adult educational classes (group 1)	-0.0946848	-0.181036	-0.00833369	0.0316296	0.596834
Connectivity between right FPN and medial VN2	Pubs/social clubs (group 2)	0.092274	0.00806568	0.176482	0.0317427	0.596834
Connectivity between medial VN and right FPN	Family and friend visits (group 3)	-0.0878566	-0.168041	-0.00767241	0.0317579	0.596834
Volume of GM in cingulate gyrus anterior division average	Adult educational classes (group 3)	0.106951	0.00827258	0.20563	0.0336514	0.600926
Volume of GM in frontal operculum cortex average	Adult educational classes (group 1)	0.0805424	0.00639249	0.154692	0.0332641	0.600926
Volume of GM in ix cerebellum average	Pubs/social clubs (group 2)	0.0850755	0.0059219	0.164229	0.0351562	0.600926
Volume of GM in juxtapositional lobule cortex formerly supplementary motor cortex average	Adult educational classes (group 1)	0.0846118	0.00681363	0.16241	0.0330425	0.600926
Volume of GM in temporal occipital fusiform cortex average	Pubs/social clubs (group 2)	0.0744699	0.00550349	0.143436	0.0343175	0.600926
Volume of GM in ventral striatum average	Leisure-time computer use (group 3)	0.130656	0.010692	0.25062	0.0327941	0.600926
Volume of GM in vermis viiia cerebellum average	Religious activities (group 3)	-0.059859	-0.115033	-0.00468507	0.0334747	0.600926
Volume of GM in viiia cerebellum average	Religious activities (group 2)	0.128768	0.0088509	0.248685	0.0353277	0.600926
Weighted mean FA in tract forceps major average	Family and friend visits (group 1)	0.118543	0.00878317	0.228303	0.0342806	0.600926
Weighted mean MD in tract middle cerebellar peduncle average	Family and friend visits (group 3)	-0.0843194	-0.161938	-0.006701	0.0332442	0.600926
Weighted mean MD in tract posterior thalamic radiation average	Family and friend visits (group 2)	-0.101409	-0.195646	-0.00717257	0.0349363	0.600926
Weighted mean MD in tract superior longitudinal fasciculus average	Religious activities (group 2)	0.135105	0.00923201	0.260979	0.0354071	0.600926
Weighted mean MD in tract superior thalamic radiation average	Family and friend visits (group 3)	-0.0796528	-0.153642	-0.00566382	0.0348624	0.600926
Weighted mean MD in tract superior thalamic radiation average	Religious activities (group 2)	0.133968	0.00934374	0.258592	0.0351289	0.600926
Connectivity between SMN2 and precuneus/PCC DMN	Adult educational classes (group 1)	0.0941646	0.00801222	0.180317	0.0321785	0.600926
Connectivity between right FPN and AN2	Religious activities (group 3)	-0.0638942	-0.122461	-0.00532759	0.0325005	0.600926
Connectivity between posterior DMN and lateral VN2	Cumulative activity	-0.0173131	-0.0331957	-0.00143047	0.0326441	0.600926
Connectivity between right FPN and SMN3	Leisure-time computer use (group 3)	-0.155306	-0.297858	-0.0127545	0.0327387	0.600926
Connectivity between posterior DMN and ECN	Sports club/gym attendance (group 2)	-0.0828845	-0.159194	-0.0065754	0.0332709	0.600926
Connectivity between ECN and AN2	Sports club/gym attendance (group 3)	-0.0586071	-0.112649	-0.00456492	0.0335473	0.600926
Connectivity between SMN3 and lateral VN2	Sports club/gym attendance (group 1)	0.0810926	0.00630031	0.155885	0.0335853	0.600926
Connectivity between SMN and right CON	Religious activities (group 3)	0.0634409	0.00482195	0.12206	0.03391	0.600926
Connectivity between right FPN and left CON	Pubs/social clubs (group 3)	0.064375	0.00481804	0.123932	0.034135	0.600926
Connectivity between lateral VN and lateral VN2	Family and friend visits (group 2)	-0.111898	-0.215458	-0.00833905	0.034197	0.600926
Connectivity between medial VN2 and BGN	Cumulative activity	-0.0171636	-0.0330579	-0.00126936	0.034307	0.600926
Connectivity between lateral VN and posterior DMN	Pubs/social clubs (group 1)	-0.0894623	-0.172313	-0.00661162	0.0343172	0.600926
Connectivity between medial VN and left FPN	Adult educational classes (group 2)	-0.104711	-0.201733	-0.00768776	0.0344114	0.600926
Connectivity between AN and SMN3	Cumulative activity	0.0167845	0.00123202	0.0323369	0.0344146	0.600926
Connectivity between ECN and BGN	Religious activities (group 1)	0.16312	0.0119004	0.314339	0.0345017	0.600926
Connectivity between SMN and posterior DMN	Leisure-time computer use (group 3)	-0.154244	-0.297267	-0.0112212	0.0345417	0.600926
Connectivity between left CON and AN2	Family and friend visits (group 2)	0.111986	0.00804365	0.215928	0.0347215	0.600926
Connectivity between right FPN and right CON	Sports club/gym attendance (group 2)	-0.0821841	-0.158574	-0.00579464	0.0349795	0.600926
Connectivity between lateral VN and AN	Pubs/social clubs (group 3)	0.0649436	0.00457482	0.125312	0.0349923	0.600926
Connectivity between lateral VN2 and precuneus/PCC DMN	Family and friend visits (group 2)	-0.112082	-0.216475	-0.00768829	0.0353552	0.600926
Volume of GM in superior temporal gyrus anterior division average	Religious activities (group 3)	0.0539589	0.00363228	0.104286	0.0356076	0.602636
Global WMH volume	Family and friend visits (group 3)	-0.0719625	-0.139363	-0.00456156	0.0363875	0.610588
Volume of GM in vermis ix cerebellum average	Family and friend visits (group 3)	-0.0813614	-0.157547	-0.00517597	0.0363418	0.610588
Connectivity between AN and BGN	Sports club/gym attendance (group 3)	-0.057577	-0.111519	-0.00363552	0.0364366	0.610588
Connectivity between SMN and posterior DMN2	Leisure-time computer use (group 1)	-0.216514	-0.419406	-0.0136222	0.0364817	0.610588
Connectivity between anterior DMN2 and AN2	Sports club/gym attendance (group 3)	0.0569193	0.00349289	0.110346	0.0367921	0.614083
Connectivity between SMN2 and CN	Religious activities (group 2)	0.141336	0.0082629	0.274409	0.0373765	0.622117
Connectivity between anterior DMN and CN	Adult educational classes (group 3)	-0.117632	-0.228447	-0.00681585	0.0374817	0.622155
Volume of GM in crus ii cerebellum average	Cumulative activity	-0.015208	-0.0295838	-0.000832146	0.0381366	0.622174
Volume of GM in occipital pole average	Leisure-time computer use (group 2)	0.140894	0.00798974	0.273798	0.0377319	0.622174
Weighted mean FA in tract corticospinal tract average	Adult educational classes (group 2)	-0.0981347	-0.190779	-0.00549051	0.037886	0.622174
Weighted mean MD in tract acoustic radiation average	Leisure-time computer use (group 2)	0.167601	0.00890831	0.326293	0.0384565	0.622174
Connectivity between left FPN and SMN2	Sports club/gym attendance (group 1)	0.0798577	0.00458367	0.155132	0.0375919	0.622174
Connectivity between left CON and AN2	Religious activities (group 3)	-0.061852	-0.120251	-0.00345257	0.0379122	0.622174
Connectivity between AN2 and right CON	Leisure-time computer use (group 1)	0.21443	0.0116593	0.417201	0.0382068	0.622174
Connectivity between left CON and ECN	Leisure-time computer use (group 3)	-0.150881	-0.293652	-0.0081106	0.0383332	0.622174
Connectivity between medial VN and right CON	Family and friend visits (group 3)	-0.0847622	-0.164994	-0.00453062	0.0383953	0.622174
Connectivity between left FPN and SMN3	Family and friend visits (group 2)	-0.109998	-0.214199	-0.00579823	0.0385466	0.622174
Connectivity between lateral VN and right FPN	Adult educational classes (group 2)	0.102422	0.00536438	0.199479	0.0386156	0.622174
Volume of GM in central opercular cortex average	Adult educational classes (group 2)	-0.0766146	-0.149956	-0.00327297	0.0406184	0.624888
Volume of GM in iiv cerebellum average	Pubs/social clubs (group 3)	-0.0578092	-0.112871	-0.00274763	0.0396151	0.624888
Volume of GM in inferior temporal gyrus anterior division average	Adult educational classes (group 2)	-0.0903209	-0.176762	-0.00387981	0.0405689	0.624888
Volume of GM in planum polare average	Sports club/gym attendance (group 2)	-0.0628901	-0.123148	-0.00263213	0.0408004	0.624888
Volume of GM in superior frontal gyrus average	Adult educational classes (group 2)	-0.0841116	-0.164767	-0.00345653	0.0409599	0.624888
Volume of GM in vermis viiia cerebellum average	Cumulative activity	-0.0155288	-0.0304268	-0.00063082	0.0410593	0.624888
Volume of putamen average	Leisure-time computer use (group 2)	0.127687	0.00574246	0.249632	0.040147	0.624888
Weighted mean FA in tract forceps minor average	Adult educational classes (group 2)	-0.0966895	-0.18944	-0.00393881	0.0410353	0.624888
Weighted mean FA in tract uncinate fasciculus average	Adult educational classes (group 2)	-0.0972079	-0.189659	-0.00475685	0.039324	0.624888
Weighted mean MD in tract parahippocampal part of cingulum average	Family and friend visits (group 1)	-0.112577	-0.219616	-0.00553745	0.0392717	0.624888
Weighted mean MD in tract superior longitudinal fasciculus average	Family and friend visits (group 2)	-0.101883	-0.199612	-0.00415369	0.0410284	0.624888
Connectivity between anterior DMN and lateral VN	Family and friend visits (group 1)	-0.115791	-0.225673	-0.00590881	0.0388919	0.624888
Connectivity between medial VN2 and SMN2	Sports club/gym attendance (group 3)	0.0567508	0.00285389	0.110648	0.0390447	0.624888
Connectivity between posterior DMN and AN2	Adult educational classes (group 2)	-0.102096	-0.199235	-0.00495642	0.0394043	0.624888
Connectivity between right FPN and SMN2	Adult educational classes (group 1)	0.0903712	0.00415549	0.176587	0.0399366	0.624888
Connectivity between posterior DMN and BGN	Religious activities (group 2)	-0.141473	-0.276597	-0.00634947	0.0401662	0.624888
Connectivity between AN and BGN	Religious activities (group 1)	-0.157509	-0.308062	-0.00695709	0.0403148	0.624888
Connectivity between SMN2 and CN	Sports club/gym attendance (group 1)	0.0778167	0.00339407	0.152239	0.0404305	0.624888
Connectivity between left CON and right CON	Religious activities (group 3)	-0.0612861	-0.119904	-0.00266814	0.0404474	0.624888
Connectivity between anterior DMN2 and BGN	Cumulative activity	0.0165478	0.000710165	0.0323854	0.0405772	0.624888
Connectivity between lateral VN and medial VN	Family and friend visits (group 2)	0.108844	0.0046458	0.213042	0.0406261	0.624888
Connectivity between posterior DMN and posterior DMN2	Religious activities (group 2)	-0.140164	-0.274355	-0.00597274	0.0406409	0.624888
Volume of GM in ix cerebellum average	Religious activities (group 2)	0.132149	0.00519473	0.259103	0.0413365	0.627525
Volume of GM in vermis ix cerebellum average	Family and friend visits (group 1)	-0.108556	-0.213065	-0.00404726	0.0417659	0.62804
Connectivity between SMN3 and precuneus/PCC DMN	Pubs/social clubs (group 1)	0.0862405	0.00322631	0.169255	0.0417388	0.62804
Connectivity between medial VN2 and posterior DMN2	Sports club/gym attendance (group 3)	0.0562137	0.00207755	0.11035	0.0418349	0.62804
Connectivity between posterior DMN and right CON	Pubs/social clubs (group 2)	-0.0874508	-0.171714	-0.00318715	0.041944	0.62804
Connectivity between medial VN2 and SMN3	Sports club/gym attendance (group 3)	0.0560892	0.00203655	0.110142	0.0419729	0.62804
Connectivity between lateral VN and SMN2	Adult educational classes (group 3)	-0.116552	-0.228883	-0.0042203	0.0419941	0.62804
Connectivity between posterior DMN2 and ECN	Pubs/social clubs (group 1)	-0.0863954	-0.169736	-0.00305511	0.0421747	0.629184
Volume of GM in brainstem average	Adult educational classes (group 3)	-0.104271	-0.205391	-0.0031515	0.0432766	0.63251
Volume of GM in inferior frontal gyrus pars triangularis average	Leisure-time computer use (group 1)	0.190814	0.00541427	0.376213	0.0436762	0.63251
Volume of GM in parietal operculum cortex average	Family and friend visits (group 1)	0.0921115	0.00230955	0.181913	0.0443934	0.63251
Volume of GM in temporal fusiform cortex posterior division average	Leisure-time computer use (group 3)	0.115869	0.0037376	0.228001	0.0428391	0.63251
Weighted mean FA in tract middle cerebellar peduncle average	Religious activities (group 3)	-0.0591221	-0.116431	-0.00181295	0.0431816	0.63251
Weighted mean MD in tract acoustic radiation average	Family and friend visits (group 1)	-0.112129	-0.220775	-0.00348202	0.0430978	0.63251
Weighted mean MD in tract anterior thalamic radiation average	Family and friend visits (group 2)	-0.0931971	-0.18344	-0.00295376	0.0429601	0.63251
Weighted mean MD in tract parahippocampal part of cingulum average	Family and friend visits (group 3)	-0.0803955	-0.158426	-0.00236526	0.04345	0.63251
Connectivity between posterior DMN and ECN	Family and friend visits (group 1)	0.113367	0.00378039	0.222954	0.0426054	0.63251
Connectivity between AN and precuneus/PCC DMN	Family and friend visits (group 2)	-0.108055	-0.212623	-0.00348802	0.0428342	0.63251
Connectivity between SMN and CN	Adult educational classes (group 3)	-0.115634	-0.227937	-0.00333157	0.0435817	0.63251
Connectivity between medial VN2 and posterior DMN2	Sports club/gym attendance (group 2)	0.0787291	0.00221953	0.155239	0.0437157	0.63251
Connectivity between SMN2 and BGN	Adult educational classes (group 1)	0.0876144	0.00245481	0.172774	0.0437533	0.63251
Connectivity between posterior DMN and medial VN2	Sports club/gym attendance (group 3)	-0.055425	-0.109335	-0.00151533	0.0439004	0.63251
Connectivity between anterior DMN2 and CN	Religious activities (group 2)	-0.137432	-0.271159	-0.00370484	0.0439834	0.63251
Connectivity between left CON and ECN	Adult educational classes (group 2)	-0.0998809	-0.197153	-0.0026088	0.0441657	0.63251
Connectivity between CN and ECN	Family and friend visits (group 2)	0.106565	0.00272804	0.210402	0.0442787	0.63251
Connectivity between SMN and ECN	Pubs/social clubs (group 3)	-0.0615826	-0.121589	-0.00157627	0.0442796	0.63251
Connectivity between posterior DMN and AN2	Family and friend visits (group 3)	-0.0820134	-0.16194	-0.00208661	0.0443131	0.63251
Connectivity between posterior DMN and CN	Leisure-time computer use (group 1)	-0.207729	-0.410342	-0.00511524	0.0444913	0.63251
Weighted mean FA in tract anterior thalamic radiation average	Religious activities (group 2)	-0.131421	-0.259773	-0.00306874	0.0447698	0.634022
Connectivity between SMN and precuneus/PCC DMN	Pubs/social clubs (group 3)	0.0618407	0.00142119	0.12226	0.0448505	0.634022
Connectivity between anterior DMN and posterior DMN2	Leisure-time computer use (group 1)	-0.205764	-0.406883	-0.0046446	0.0449401	0.634022
Connectivity between SMN3 and lateral VN2	Religious activities (group 3)	0.0596964	0.00132644	0.118066	0.0450175	0.634022
Connectivity between left FPN and anterior DMN2	Adult educational classes (group 2)	0.0992115	0.0020951	0.196328	0.0452595	0.635948
Connectivity between medial VN2 and ECN	Pubs/social clubs (group 3)	0.0615297	0.00126348	0.121796	0.0453877	0.636271
Connectivity between posterior DMN2 and lateral VN2	Leisure-time computer use (group 3)	0.144871	0.00256037	0.287181	0.0460192	0.642369
Connectivity between SMN and right CON	Sports club/gym attendance (group 2)	-0.0775877	-0.15381	-0.00136558	0.0460354	0.642369
Volume of GM in middle frontal gyrus average	Pubs/social clubs (group 3)	-0.0497762	-0.0987922	-0.000760239	0.0465519	0.64659
Weighted mean MD in tract middle cerebellar peduncle average	Leisure-time computer use (group 2)	-0.157971	-0.313505	-0.00243759	0.0465169	0.64659
Volume of GM in crus ii cerebellum average	Pubs/social clubs (group 3)	-0.0553776	-0.109988	-0.000767743	0.0468658	0.647133
Weighted mean MD in tract forceps minor average	Family and friend visits (group 2)	-0.102549	-0.203794	-0.00130491	0.0471202	0.647133
Connectivity between lateral VN and anterior DMN2	Pubs/social clubs (group 1)	0.0845488	0.00119773	0.1679	0.0467984	0.647133
Connectivity between anterior DMN2 and BGN	Family and friend visits (group 3)	0.0809027	0.00104313	0.160762	0.0470824	0.647133
Connectivity between anterior DMN and BGN	Religious activities (group 1)	-0.152272	-0.302672	-0.00187247	0.0472159	0.647133
Connectivity between SMN2 and ECN	Pubs/social clubs (group 1)	0.0833867	0.00101878	0.165755	0.0472336	0.647133
Volume of GM in precentral gyrus average	Pubs/social clubs (group 1)	-0.0662425	-0.131726	-0.000758712	0.0474047	0.648007
Connectivity between AN2 and precuneus/PCC DMN	Adult educational classes (group 1)	-0.0871682	-0.173389	-0.000947277	0.0475362	0.648338
Connectivity between lateral VN and posterior DMN2	Adult educational classes (group 1)	-0.0857316	-0.170709	-0.000753994	0.0480021	0.652588
Connectivity between SMN2 and ECN	Sports club/gym attendance (group 1)	0.0752252	0.000626866	0.149824	0.0481062	0.652588
Connectivity between right FPN and ECN	Sports club/gym attendance (group 2)	0.0772547	0.000621282	0.153888	0.0481718	0.652588
Volume of GM in angular gyrus average	Family and friend visits (group 2)	0.0933295	0.000616002	0.186043	0.0484975	0.65261
Volume of GM in frontal operculum cortex average	Sports club/gym attendance (group 1)	0.0652886	0.000450672	0.130127	0.0484291	0.65261
Connectivity between medial VN and BGN	Sports club/gym attendance (group 3)	-0.0543979	-0.108416	-0.00037975	0.0484114	0.65261
Volume of GM in vermis crus ii cerebellum average	Cumulative activity	-0.0157089	-0.0313254	-9.2494e-05	0.0486588	0.653325
Connectivity between SMN3 and BGN	Sports club/gym attendance (group 1)	-0.0745935	-0.148811	-0.000375803	0.0488515	0.654458
Global WMH volume	Family and friend visits (group 2)	-0.0884517	-0.176579	-0.000324039	0.0491638	0.655734
Connectivity between left CON and BGN	Sports club/gym attendance (group 1)	0.0757886	0.000310811	0.151266	0.0490643	0.655734
Volume of caudate average	Pubs/social clubs (group 1)	0.0686447	0.000118055	0.137171	0.0496067	0.660185
Weighted mean MD in tract inferior frontooccipital fasciculus average	Leisure-time computer use (group 3)	0.132137	-9.21009e-05	0.264367	0.0501597	0.661722
Connectivity between AN2 and lateral VN2	Family and friend visits (group 3)	0.079949	1.66909e-05	0.159881	0.0499522	0.661722
Connectivity between anterior DMN and posterior DMN	Sports club/gym attendance (group 2)	-0.0760704	-0.152176	3.50428e-05	0.0501056	0.661722
Connectivity between anterior DMN and SMN3	Cumulative activity	-0.0157988	-0.0316086	1.10531e-05	0.0501603	0.661722
Volume of GM in lateral occipital cortex superior division average	Adult educational classes (group 3)	0.0881612	-0.000197012	0.176519	0.0505129	0.664921
Volume of GM in occipital fusiform gyrus average	Adult educational classes (group 3)	0.093879	-0.000255224	0.188013	0.0506242	0.664938
Volume of GM in frontal pole average	Pubs/social clubs (group 1)	-0.0555644	-0.111362	0.00023269	0.0509628	0.667934
Connectivity between medial VN and SMN2	Adult educational classes (group 2)	-0.0969644	-0.19441	0.000481036	0.0511414	0.668823
Volume of GM in superior temporal gyrus anterior division average	Adult educational classes (group 1)	0.0734466	-0.000413088	0.147306	0.0512948	0.669381
Connectivity between lateral VN and lateral VN2	Pubs/social clubs (group 1)	-0.0818922	-0.164295	0.000510576	0.0514361	0.669778
Volume of GM in frontal medial cortex average	Pubs/social clubs (group 1)	-0.0745424	-0.149907	0.000821738	0.0525502	0.669959
Volume of GM in inferior temporal gyrus temporooccipital part average	Religious activities (group 3)	-0.0493856	-0.0992783	0.000507162	0.0523741	0.669959
Volume of GM in lingual gyrus average	Adult educational classes (group 1)	0.0617396	-0.000672623	0.124152	0.05252	0.669959
Volume of GM in superior frontal gyrus average	Leisure-time computer use (group 3)	0.117194	-0.0011784	0.235566	0.0523241	0.669959
Volume of GM in vi cerebellum average	Religious activities (group 2)	0.113628	-0.000919394	0.228175	0.0518669	0.669959
Connectivity between posterior DMN and SMN2	Sports club/gym attendance (group 1)	0.0744881	-0.000748267	0.149724	0.0523218	0.669959
Connectivity between SMN and left FPN	Cumulative activity	-0.0157602	-0.0316842	0.000163859	0.0524038	0.669959
Connectivity between medial VN2 and SMN2	Leisure-time computer use (group 1)	-0.199811	-0.40178	0.00215846	0.0524985	0.669959
Connectivity between left FPN and AN	Leisure-time computer use (group 2)	-0.158712	-0.319206	0.0017816	0.0525973	0.669959
Connectivity between lateral VN and medial VN	Leisure-time computer use (group 3)	-0.140547	-0.282694	0.00159936	0.0526333	0.669959
Connectivity between medial VN and ECN	Religious activities (group 2)	0.132415	-0.00152747	0.266358	0.0526698	0.669959
Global WMH volume	Sports club/gym attendance (group 1)	0.0623356	-0.00116637	0.125838	0.0543579	0.675194
Volume of caudate average	Sports club/gym attendance (group 2)	-0.0606157	-0.123517	0.00228532	0.0589223	0.675194
Global GM volume	Family and friend visits (group 1)	0.0519397	-0.00147768	0.105357	0.0566814	0.675194
Volume of GM in central opercular cortex average	Family and friend visits (group 1)	0.0813479	-0.00147196	0.164168	0.054212	0.675194
Volume of GM in cingulate gyrus anterior division average	Pubs/social clubs (group 2)	-0.0712807	-0.144904	0.00234269	0.0577469	0.675194
Volume of GM in heschls gyrus includes h1 and h2 average	Sports club/gym attendance (group 2)	-0.0602287	-0.121837	0.00137934	0.0553532	0.675194
Volume of GM in inferior frontal gyrus pars opercularis average	Adult educational classes (group 3)	0.0983185	-0.00345334	0.20009	0.0582947	0.675194
Volume of GM in insular cortex average	Leisure-time computer use (group 1)	0.139049	-0.00501627	0.283115	0.0585261	0.675194
Volume of GM in middle frontal gyrus average	Leisure-time computer use (group 1)	0.161812	-0.0029854	0.32661	0.054296	0.675194
Volume of GM in superior temporal gyrus posterior division average	Adult educational classes (group 1)	0.0697863	-0.00158592	0.141159	0.0553111	0.675194
Volume of GM in vermis viiib cerebellum average	Family and friend visits (group 2)	0.0959125	-0.00292372	0.194749	0.0571711	0.675194
Volume of GM in viib cerebellum average	Pubs/social clubs (group 3)	-0.0526757	-0.107355	0.00200345	0.0590032	0.675194
Volume of GM in x cerebellum average	Pubs/social clubs (group 3)	-0.0508853	-0.103649	0.0018781	0.0587289	0.675194
Volume of hippocampus average	Adult educational classes (group 2)	-0.0828391	-0.168829	0.00315092	0.059004	0.675194
Volume of pallidum average	Family and friend visits (group 3)	-0.0684074	-0.138964	0.00214968	0.0573984	0.675194
Global WM volume	Religious activities (group 3)	-0.028731	-0.0581733	0.000711346	0.0557964	0.675194
Weighted mean FA in tract corticospinal tract average	Leisure-time computer use (group 3)	-0.131064	-0.267011	0.00488217	0.0588122	0.675194
Weighted mean FA in tract forceps major average	Family and friend visits (group 3)	0.0782147	-0.00179891	0.158228	0.0553765	0.675194
Weighted mean FA in tract forceps minor average	Religious activities (group 2)	-0.124015	-0.252562	0.00453202	0.0586402	0.675194
Weighted mean FA in tract inferior frontooccipital fasciculus average	Family and friend visits (group 3)	0.0762095	-0.00105838	0.153477	0.0532209	0.675194
Weighted mean FA in tract superior thalamic radiation average	Adult educational classes (group 2)	-0.0928092	-0.187389	0.00177014	0.0544435	0.675194
Weighted mean MD in tract acoustic radiation average	Pubs/social clubs (group 3)	0.0584692	-0.00120293	0.118141	0.0547994	0.675194
Weighted mean MD in tract anterior thalamic radiation average	Adult educational classes (group 3)	0.0945998	-0.00258065	0.19178	0.0564003	0.675194
Weighted mean MD in tract inferior longitudinal fasciculus average	Family and friend visits (group 2)	-0.0944578	-0.192387	0.0034719	0.0586918	0.675194
Connectivity between BGN and lateral VN2	Religious activities (group 2)	0.133047	-0.00192344	0.268018	0.0533545	0.675194
Connectivity between lateral VN and AN2	Adult educational classes (group 3)	-0.108837	-0.219464	0.00178929	0.0538214	0.675194
Connectivity between AN and lateral VN2	Leisure-time computer use (group 3)	-0.140346	-0.283091	0.0023991	0.0539757	0.675194
Connectivity between CN and right CON	Religious activities (group 2)	0.13201	-0.00234343	0.266363	0.054131	0.675194
Connectivity between lateral VN and lateral VN2	Family and friend visits (group 3)	-0.0778066	-0.15701	0.00139673	0.0541781	0.675194
Connectivity between medial VN2 and AN2	Sports club/gym attendance (group 3)	0.0530474	-0.000979398	0.107074	0.0542991	0.675194
Connectivity between ECN and lateral VN2	Sports club/gym attendance (group 3)	0.0523956	-0.00110191	0.105893	0.0549079	0.675194
Connectivity between left FPN and AN2	Religious activities (group 2)	0.131818	-0.00302824	0.266665	0.0553701	0.675194
Connectivity between lateral VN and right FPN	Sports club/gym attendance (group 2)	-0.0745825	-0.150884	0.00171885	0.0553876	0.675194
Connectivity between lateral VN and AN2	Pubs/social clubs (group 1)	0.0797973	-0.0019343	0.161529	0.0556725	0.675194
Connectivity between medial VN and SMN3	Leisure-time computer use (group 1)	0.197465	-0.00487334	0.399804	0.0557774	0.675194
Connectivity between SMN2 and precuneus/PCC DMN	Leisure-time computer use (group 1)	-0.197589	-0.400087	0.00490955	0.0558176	0.675194
Connectivity between lateral VN and BGN	Family and friend visits (group 1)	0.107314	-0.00267978	0.217308	0.0558472	0.675194
Connectivity between anterior DMN and posterior DMN	Adult educational classes (group 3)	-0.109433	-0.22162	0.00275303	0.0558917	0.675194
Connectivity between medial VN2 and AN	Leisure-time computer use (group 1)	-0.194977	-0.394961	0.00500812	0.0560182	0.675194
Connectivity between anterior DMN and posterior DMN2	Sports club/gym attendance (group 3)	-0.0522971	-0.105974	0.00138004	0.0561865	0.675194
Connectivity between lateral VN and anterior DMN2	Cumulative activity	0.015449	-0.000436599	0.0313346	0.0566359	0.675194
Connectivity between SMN2 and anterior DMN2	Cumulative activity	0.0154105	-0.00044384	0.0312649	0.0567659	0.675194
Connectivity between medial VN and AN2	Pubs/social clubs (group 1)	-0.0809998	-0.164351	0.00235136	0.0568207	0.675194
Connectivity between medial VN2 and lateral VN2	Cumulative activity	0.0152921	-0.0004583	0.0310425	0.0570473	0.675194
Connectivity between anterior DMN and SMN3	Leisure-time computer use (group 2)	0.155068	-0.00470194	0.314838	0.0571322	0.675194
Connectivity between AN and precuneus/PCC DMN	Leisure-time computer use (group 2)	0.154941	-0.00533573	0.315218	0.0581279	0.675194
Connectivity between SMN and right FPN	Family and friend visits (group 2)	0.101101	-0.00349402	0.205696	0.0581576	0.675194
Connectivity between posterior DMN2 and SMN3	Pubs/social clubs (group 2)	-0.0808622	-0.164527	0.00280226	0.0581807	0.675194
Connectivity between anterior DMN and posterior DMN	Family and friend visits (group 3)	-0.0769329	-0.156582	0.00271646	0.0583398	0.675194
Connectivity between medial VN and SMN2	Sports club/gym attendance (group 3)	0.0522558	-0.00194157	0.106453	0.058789	0.675194
Connectivity between AN and CN	Sports club/gym attendance (group 1)	0.0719535	-0.00267841	0.146585	0.0588058	0.675194
Connectivity between SMN2 and ECN	Family and friend visits (group 3)	0.0763321	-0.00285846	0.155523	0.0588603	0.675194
Connectivity between SMN and CN	Cumulative activity	0.0152436	-0.000571364	0.0310585	0.0588688	0.675194
Volume of GM in frontal operculum cortex average	Sports club/gym attendance (group 2)	0.0632212	-0.00252096	0.128963	0.0594533	0.67531
Volume of GM in v cerebellum average	Pubs/social clubs (group 2)	0.0713177	-0.00300562	0.145641	0.0600095	0.67531
Volume of GM in vermis crus ii cerebellum average	Sports club/gym attendance (group 1)	-0.0713601	-0.145557	0.00283693	0.059424	0.67531
Volume of thalamus average	Leisure-time computer use (group 2)	0.105737	-0.00469901	0.216173	0.0605744	0.67531
Weighted mean MD in tract anterior thalamic radiation average	Adult educational classes (group 2)	0.080431	-0.00344386	0.164306	0.060175	0.67531
Connectivity between posterior DMN and precuneus/PCC DMN	Adult educational classes (group 2)	-0.0929404	-0.189559	0.00367846	0.0593808	0.67531
Connectivity between medial VN and BGN	Leisure-time computer use (group 3)	-0.13703	-0.279572	0.00551213	0.0595391	0.67531
Connectivity between SMN and medial VN2	Pubs/social clubs (group 1)	0.0798311	-0.00332452	0.162987	0.0598869	0.67531
Connectivity between anterior DMN and right FPN	Cumulative activity	0.0151803	-0.000644664	0.0310053	0.0600889	0.67531
Connectivity between medial VN and BGN	Pubs/social clubs (group 2)	0.0805359	-0.00343086	0.164503	0.0601216	0.67531
Connectivity between SMN and anterior DMN2	Family and friend visits (group 2)	0.0999082	-0.00436658	0.204183	0.0603935	0.67531
Connectivity between SMN and SMN3	Cumulative activity	-0.0146957	-0.0300369	0.000645514	0.0604475	0.67531
Connectivity between medial VN2 and ECN	Leisure-time computer use (group 1)	-0.194061	-0.396711	0.00858917	0.06053	0.67531
Connectivity between posterior DMN2 and precuneus/PCC DMN	Family and friend visits (group 3)	-0.0754392	-0.154232	0.00335395	0.0605789	0.67531
Volume of GM in temporal fusiform cortex anterior division average	Leisure-time computer use (group 3)	0.11186	-0.00504351	0.228764	0.0607339	0.675791
Volume of GM in precentral gyrus average	Leisure-time computer use (group 1)	0.15231	-0.00704916	0.311669	0.0610286	0.676266
Weighted mean FA in tract medial lemniscus average	Pubs/social clubs (group 3)	0.0553857	-0.00268182	0.113453	0.0615579	0.676266
Weighted mean MD in tract inferior longitudinal fasciculus average	Adult educational classes (group 2)	0.0868423	-0.00420039	0.177885	0.0615448	0.676266
Connectivity between SMN3 and anterior DMN2	Adult educational classes (group 1)	-0.0821513	-0.168206	0.00390357	0.061334	0.676266
Connectivity between lateral VN2 and right CON	Pubs/social clubs (group 2)	0.0802558	-0.00383329	0.164345	0.0613951	0.676266
Connectivity between medial VN and right CON	Cumulative activity	0.0151806	-0.000729763	0.031091	0.0614715	0.676266
Connectivity between SMN2 and CN	Family and friend visits (group 1)	0.103332	-0.00504269	0.211706	0.0616521	0.676266
Connectivity between posterior DMN and anterior DMN2	Sports club/gym attendance (group 1)	-0.0720575	-0.147637	0.00352226	0.061672	0.676266
Volume of GM in crus ii cerebellum average	Family and friend visits (group 2)	0.0900379	-0.00473192	0.184808	0.0625853	0.677072
Volume of GM in frontal operculum cortex average	Adult educational classes (group 2)	-0.0791257	-0.162752	0.00450106	0.0636678	0.677072
Volume of GM in middle temporal gyrus posterior division average	Cumulative activity	0.0118766	-0.000701281	0.0244544	0.0642109	0.677072
Volume of GM in middle temporal gyrus temporooccipital part average	Family and friend visits (group 2)	0.0859845	-0.00504072	0.17701	0.0641043	0.677072
Volume of GM in middle temporal gyrus temporooccipital part average	Adult educational classes (group 3)	0.0925845	-0.00545792	0.190627	0.0641866	0.677072
Volume of pallidum average	Family and friend visits (group 1)	-0.0918415	-0.188629	0.00494635	0.0629103	0.677072
Weighted mean MD in tract superior longitudinal fasciculus average	Family and friend visits (group 1)	-0.0968919	-0.199423	0.00563975	0.0639996	0.677072
Weighted mean MD in tract superior thalamic radiation average	Family and friend visits (group 1)	-0.0960703	-0.197566	0.00542545	0.0635648	0.677072
Weighted mean MD in tract uncinate fasciculus average	Adult educational classes (group 2)	0.0866443	-0.00466658	0.177955	0.0629107	0.677072
Connectivity between posterior DMN2 and SMN3	Sports club/gym attendance (group 1)	0.0714392	-0.00355086	0.146429	0.0618763	0.677072
Connectivity between left FPN and AN	Leisure-time computer use (group 1)	-0.193131	-0.395957	0.00969569	0.062	0.677072
Connectivity between SMN3 and BGN	Family and friend visits (group 1)	-0.102845	-0.210939	0.00524927	0.0622083	0.677072
Connectivity between SMN2 and anterior DMN2	Adult educational classes (group 1)	0.0817852	-0.00436073	0.167931	0.062776	0.677072
Connectivity between anterior DMN and CN	Leisure-time computer use (group 2)	-0.149642	-0.307349	0.00806493	0.0629197	0.677072
Connectivity between posterior DMN2 and precuneus/PCC DMN	Religious activities (group 2)	-0.125866	-0.258599	0.00686724	0.0630858	0.677072
Connectivity between ECN and lateral VN2	Cumulative activity	0.0148798	-0.000817487	0.030577	0.0631807	0.677072
Connectivity between posterior DMN2 and SMN3	Leisure-time computer use (group 1)	0.191121	-0.0105833	0.392825	0.0632896	0.677072
Connectivity between right FPN and precuneus/PCC DMN	Family and friend visits (group 1)	-0.103707	-0.213294	0.00587871	0.0636179	0.677072
Connectivity between medial VN and right CON	Family and friend visits (group 1)	-0.104149	-0.214208	0.00590991	0.0636327	0.677072
Connectivity between ECN and precuneus/PCC DMN	Sports club/gym attendance (group 3)	-0.0506901	-0.10429	0.00290968	0.0637974	0.677072
Connectivity between AN and lateral VN2	Leisure-time computer use (group 2)	-0.151669	-0.312068	0.00873037	0.0638377	0.677072
Connectivity between medial VN2 and right CON	Religious activities (group 3)	-0.0556359	-0.114488	0.00321641	0.0639004	0.677072
Connectivity between SMN2 and AN2	Family and friend visits (group 2)	-0.098231	-0.202355	0.00589268	0.0644476	0.678384
Volume of caudate average	Adult educational classes (group 1)	0.0662087	-0.004757	0.137174	0.0674573	0.680082
Global GM volume	Adult educational classes (group 3)	0.0510615	-0.00375781	0.105881	0.067904	0.680082
Volume of GM in brainstem average	Pubs/social clubs (group 3)	-0.0504758	-0.104574	0.00362272	0.0674376	0.680082
Volume of GM in frontal operculum cortex average	Sports club/gym attendance (group 3)	0.0432912	-0.00322626	0.0898086	0.0681427	0.680082
Volume of GM in middle temporal gyrus temporooccipital part average	Family and friend visits (group 1)	0.088975	-0.00652335	0.184473	0.067833	0.680082
Volume of GM in planum polare average	Adult educational classes (group 1)	0.0636346	-0.00434482	0.131614	0.0665463	0.680082
Volume of GM in temporal fusiform cortex anterior division average	Adult educational classes (group 2)	-0.0742201	-0.153914	0.0054736	0.0679436	0.680082
Volume of GM in vermis crus i cerebellum average	Leisure-time computer use (group 2)	-0.15001	-0.310072	0.0100519	0.0662235	0.680082
Volume of GM in viiib cerebellum average	Pubs/social clubs (group 3)	-0.050923	-0.105699	0.00385318	0.0684359	0.680082
Volume of hippocampus average	Family and friend visits (group 2)	0.086584	-0.00594518	0.179113	0.0666446	0.680082
Volume of putamen average	Religious activities (group 2)	-0.0963033	-0.198876	0.00626967	0.06574	0.680082
Volume of putamen average	Sports club/gym attendance (group 3)	0.0382984	-0.00288853	0.0794853	0.068373	0.680082
Global WM volume	Leisure-time computer use (group 2)	0.0754439	-0.00490196	0.15579	0.0657074	0.680082
Weighted mean MD in tract superior longitudinal fasciculus average	Adult educational classes (group 3)	0.0990358	-0.00620934	0.204281	0.0651312	0.680082
Weighted mean MD in tract superior thalamic radiation average	Sports club/gym attendance (group 1)	0.0656723	-0.00405227	0.135397	0.0648803	0.680082
Connectivity between left FPN and SMN3	Family and friend visits (group 3)	-0.0749362	-0.15463	0.00475716	0.0653296	0.680082
Connectivity between left CON and ECN	Leisure-time computer use (group 2)	-0.150632	-0.31106	0.00979614	0.0657223	0.680082
Connectivity between posterior DMN and AN2	Pubs/social clubs (group 3)	0.0564538	-0.00375379	0.116661	0.0660926	0.680082
Connectivity between SMN and posterior DMN2	Pubs/social clubs (group 2)	0.07888	-0.00524956	0.16301	0.0661074	0.680082
Connectivity between SMN3 and lateral VN2	Pubs/social clubs (group 3)	-0.0561101	-0.115981	0.00376079	0.0662277	0.680082
Connectivity between posterior DMN and precuneus/PCC DMN	Family and friend visits (group 3)	-0.0744536	-0.153965	0.00505791	0.0664588	0.680082
Connectivity between anterior DMN and SMN3	Religious activities (group 3)	-0.0547226	-0.11328	0.00383485	0.0670051	0.680082
Connectivity between SMN2 and AN2	Family and friend visits (group 1)	-0.102041	-0.211282	0.00719941	0.0671266	0.680082
Connectivity between lateral VN and CN	Family and friend visits (group 3)	0.0741172	-0.00527479	0.153509	0.0672834	0.680082
Connectivity between right FPN and precuneus/PCC DMN	Leisure-time computer use (group 2)	-0.149469	-0.309593	0.0106549	0.0673133	0.680082
Connectivity between left FPN and ECN	Family and friend visits (group 3)	-0.0743996	-0.154113	0.00531415	0.0673496	0.680082
Connectivity between medial VN2 and AN2	Sports club/gym attendance (group 1)	0.0702524	-0.00505237	0.145557	0.0674749	0.680082
Connectivity between anterior DMN and ECN	Adult educational classes (group 3)	-0.104209	-0.216027	0.0076084	0.0677547	0.680082
Connectivity between medial VN2 and ECN	Religious activities (group 1)	-0.140633	-0.291595	0.0103282	0.0678648	0.680082
Connectivity between SMN2 and AN2	Religious activities (group 2)	0.124918	-0.00920938	0.259046	0.0679372	0.680082
Connectivity between medial VN and SMN3	Adult educational classes (group 2)	0.0903586	-0.00673258	0.18745	0.0681388	0.680082
Connectivity between posterior DMN2 and BGN	Sports club/gym attendance (group 3)	-0.0497016	-0.103148	0.0037451	0.068355	0.680082
Connectivity between left FPN and AN	Family and friend visits (group 3)	0.0744267	-0.00561323	0.154467	0.0683724	0.680082
Connectivity between AN2 and precuneus/PCC DMN	Adult educational classes (group 2)	-0.0904118	-0.187652	0.00682873	0.0684006	0.680082
Connectivity between anterior DMN2 and CN	Cumulative activity	-0.0146285	-0.0303761	0.00111912	0.0686509	0.681098
Connectivity between right FPN and posterior DMN	Leisure-time computer use (group 3)	0.132629	-0.0102192	0.275476	0.0687919	0.681378
Volume of GM in middle temporal gyrus temporooccipital part average	Sports club/gym attendance (group 2)	-0.0616615	-0.128181	0.00485818	0.0692393	0.683964
Weighted mean FA in tract inferior longitudinal fasciculus average	Family and friend visits (group 3)	0.0712242	-0.00562267	0.148071	0.0692794	0.683964
Volume of GM in temporal fusiform cortex posterior division average	Adult educational classes (group 2)	-0.0705598	-0.146973	0.00585364	0.0703179	0.684883
Volume of GM in vermis ix cerebellum average	Cumulative activity	-0.0139396	-0.0290487	0.00116947	0.0705606	0.684883
Global WM volume	Leisure-time computer use (group 3)	0.0661167	-0.00538588	0.137619	0.0699296	0.684883
Weighted mean FA in tract inferior frontooccipital fasciculus average	Adult educational classes (group 2)	-0.0866548	-0.180555	0.00724503	0.070486	0.684883
Weighted mean MD in tract posterior thalamic radiation average	Family and friend visits (group 1)	-0.091196	-0.190064	0.0076716	0.0706193	0.684883
Connectivity between right FPN and precuneus/PCC DMN	Leisure-time computer use (group 3)	-0.131956	-0.274455	0.0105441	0.0695281	0.684883
Connectivity between CN and BGN	Family and friend visits (group 3)	0.0725298	-0.00596439	0.151024	0.0701298	0.684883
Connectivity between posterior DMN2 and SMN2	Family and friend visits (group 1)	0.101325	-0.00840284	0.211052	0.0703101	0.684883
Connectivity between medial VN and left FPN	Leisure-time computer use (group 3)	0.131513	-0.0109104	0.273936	0.0703182	0.684883
Connectivity between posterior DMN and medial VN2	Religious activities (group 2)	-0.124041	-0.258381	0.0102997	0.0703374	0.684883
Connectivity between AN and AN2	Religious activities (group 2)	0.123281	-0.0102845	0.256846	0.0704381	0.684883
Connectivity between posterior DMN and AN	Adult educational classes (group 1)	-0.0794915	-0.165732	0.00674931	0.0708229	0.685756
Volume of GM in subcallosal cortex average	Cumulative activity	0.0104755	-0.000896101	0.021847	0.0709884	0.686259
Connectivity between anterior DMN and precuneus/PCC DMN	Pubs/social clubs (group 1)	0.0748385	-0.00644262	0.15612	0.0711298	0.686528
Global WMH volume	Sports club/gym attendance (group 3)	0.0418337	-0.00372524	0.0873926	0.0719016	0.688121
Volume of GM in brainstem average	Adult educational classes (group 1)	-0.069363	-0.146748	0.00802174	0.0789451	0.688121
Volume of GM in cingulate gyrus posterior division average	Leisure-time computer use (group 3)	0.093413	-0.00880953	0.195636	0.0732782	0.688121
Volume of GM in frontal pole average	Family and friend visits (group 1)	0.0662604	-0.00730673	0.139828	0.077506	0.688121
Volume of GM in frontal pole average	Family and friend visits (group 3)	0.048036	-0.00559342	0.101665	0.0791582	0.688121
Volume of GM in inferior frontal gyrus pars triangularis average	Family and friend visits (group 1)	0.0919372	-0.00849816	0.192373	0.0727869	0.688121
Volume of GM in inferior frontal gyrus pars triangularis average	Pubs/social clubs (group 3)	-0.0503838	-0.10554	0.00477284	0.073389	0.688121
Volume of GM in inferior temporal gyrus posterior division average	Pubs/social clubs (group 1)	-0.0637497	-0.133976	0.00647672	0.0751994	0.688121
Volume of GM in insular cortex average	Religious activities (group 3)	-0.0381431	-0.0799412	0.00365503	0.0736768	0.688121
Volume of GM in ix cerebellum average	Pubs/social clubs (group 3)	-0.0511352	-0.107884	0.00561343	0.0773734	0.688121
Volume of GM in middle temporal gyrus anterior division average	Leisure-time computer use (group 3)	0.11056	-0.0110998	0.23222	0.0748822	0.688121
Volume of GM in superior frontal gyrus average	Leisure-time computer use (group 2)	0.12059	-0.0124218	0.253602	0.0755733	0.688121
Volume of GM in temporal fusiform cortex posterior division average	Pubs/social clubs (group 3)	0.0422211	-0.00512778	0.0895699	0.0805069	0.688121
Volume of GM in vermis x cerebellum average	Adult educational classes (group 1)	0.0753556	-0.00765622	0.158368	0.0752008	0.688121
Volume of GM in viiib cerebellum average	Pubs/social clubs (group 2)	0.0702565	-0.00614605	0.146659	0.0714925	0.688121
Volume of thalamus average	Religious activities (group 3)	-0.036189	-0.0766626	0.00428451	0.0796826	0.688121
Weighted mean FA in tract acoustic radiation average	Pubs/social clubs (group 2)	0.0744293	-0.0079692	0.156828	0.0766523	0.688121
Weighted mean FA in tract acoustic radiation average	Religious activities (group 2)	-0.119168	-0.25125	0.0129135	0.0769967	0.688121
Weighted mean FA in tract anterior thalamic radiation average	Adult educational classes (group 2)	-0.0840009	-0.17658	0.00857833	0.0753386	0.688121
Weighted mean FA in tract cingulate gyrus part of cingulum average	Leisure-time computer use (group 3)	-0.123436	-0.26184	0.0149678	0.0804552	0.688121
Weighted mean MD in tract cingulate gyrus part of cingulum average	Adult educational classes (group 2)	0.0853856	-0.00955119	0.180322	0.0779299	0.688121
Weighted mean MD in tract inferior frontooccipital fasciculus average	Religious activities (group 2)	0.111683	-0.0131818	0.236547	0.0795849	0.688121
Weighted mean MD in tract middle cerebellar peduncle average	Cumulative activity	-0.0137858	-0.029182	0.00161049	0.0792604	0.688121
Weighted mean MD in tract posterior thalamic radiation average	Family and friend visits (group 3)	-0.0649343	-0.137008	0.00713887	0.077417	0.688121
Connectivity between posterior DMN2 and SMN3	Pubs/social clubs (group 3)	-0.0551098	-0.115092	0.00487276	0.0717373	0.688121
Connectivity between medial VN2 and BGN	Adult educational classes (group 1)	0.0792917	-0.00708118	0.165665	0.0719686	0.688121
Connectivity between anterior DMN and posterior DMN2	Family and friend visits (group 2)	0.0953174	-0.00851577	0.199151	0.0719779	0.688121
Connectivity between SMN2 and BGN	Cumulative activity	0.0143701	-0.00130192	0.0300421	0.0723067	0.688121
Connectivity between lateral VN2 and precuneus/PCC DMN	Family and friend visits (group 3)	-0.0731069	-0.152948	0.00673408	0.0727027	0.688121
Connectivity between lateral VN and medial VN2	Family and friend visits (group 2)	0.0955703	-0.00884202	0.199983	0.072809	0.688121
Connectivity between medial VN and anterior DMN2	Adult educational classes (group 1)	-0.0788805	-0.165277	0.00751554	0.073533	0.688121
Connectivity between CN and BGN	Adult educational classes (group 3)	0.100837	-0.00970858	0.211383	0.0737966	0.688121
Connectivity between posterior DMN and left CON	Family and friend visits (group 1)	-0.0993647	-0.208403	0.00967336	0.0740789	0.688121
Connectivity between left FPN and SMN3	Family and friend visits (group 1)	-0.0995714	-0.208892	0.00974935	0.0742267	0.688121
Connectivity between SMN3 and right CON	Adult educational classes (group 2)	-0.0876328	-0.183855	0.0085893	0.0742535	0.688121
Connectivity between SMN2 and left CON	Family and friend visits (group 3)	-0.0727672	-0.152685	0.00715023	0.0743186	0.688121
Connectivity between lateral VN and posterior DMN2	Adult educational classes (group 3)	-0.101086	-0.212128	0.00995541	0.0743773	0.688121
Connectivity between SMN2 and AN	Religious activities (group 2)	0.122022	-0.0120308	0.256075	0.0744066	0.688121
Connectivity between lateral VN and CN	Sports club/gym attendance (group 3)	0.0488551	-0.00482742	0.102538	0.0744635	0.688121
Connectivity between lateral VN and medial VN	Family and friend visits (group 1)	0.0994587	-0.00985995	0.208777	0.0745493	0.688121
Connectivity between CN and right CON	Religious activities (group 3)	-0.053255	-0.111842	0.00533216	0.0748105	0.688121
Connectivity between lateral VN2 and right CON	Religious activities (group 1)	0.137187	-0.0138273	0.288202	0.0749865	0.688121
Connectivity between SMN and medial VN	Religious activities (group 1)	-0.137179	-0.288389	0.01403	0.0753792	0.688121
Connectivity between medial VN and left FPN	Adult educational classes (group 1)	-0.0780079	-0.164036	0.00801998	0.0755208	0.688121
Connectivity between SMN3 and AN2	Sports club/gym attendance (group 3)	0.048595	-0.00505433	0.102244	0.0758388	0.688121
Connectivity between SMN2 and SMN3	Adult educational classes (group 3)	0.101081	-0.0105719	0.212733	0.0759927	0.688121
Connectivity between ECN and AN2	Adult educational classes (group 2)	0.0879538	-0.00924386	0.185151	0.0761281	0.688121
Connectivity between right FPN and AN2	Sports club/gym attendance (group 3)	0.0487084	-0.00519044	0.102607	0.0765168	0.688121
Connectivity between anterior DMN2 and right CON	Leisure-time computer use (group 1)	-0.180808	-0.381136	0.0195203	0.0768895	0.688121
Connectivity between right FPN and SMN3	Pubs/social clubs (group 3)	0.0543124	-0.00593698	0.114562	0.0772494	0.688121
Connectivity between SMN3 and CN	Adult educational classes (group 1)	0.0756832	-0.00833247	0.159699	0.0774589	0.688121
Connectivity between medial VN2 and SMN2	Sports club/gym attendance (group 1)	0.0676495	-0.0074743	0.142773	0.0775627	0.688121
Connectivity between AN and CN	Religious activities (group 2)	0.120213	-0.0132896	0.253716	0.07758	0.688121
Connectivity between SMN2 and anterior DMN2	Adult educational classes (group 2)	-0.0874824	-0.184638	0.00967353	0.0775871	0.688121
Connectivity between medial VN and BGN	Religious activities (group 2)	-0.121093	-0.255642	0.0134559	0.0777323	0.688121
Connectivity between SMN2 and AN	Family and friend visits (group 3)	0.0716355	-0.0079676	0.151239	0.07776	0.688121
Connectivity between SMN3 and CN	Religious activities (group 2)	0.118099	-0.013215	0.249414	0.07794	0.688121
Connectivity between SMN and right FPN	Religious activities (group 1)	-0.135714	-0.286635	0.0152066	0.0779805	0.688121
Connectivity between SMN2 and precuneus/PCC DMN	Adult educational classes (group 2)	0.0873528	-0.00981037	0.184516	0.0780497	0.688121
Connectivity between SMN and SMN3	Adult educational classes (group 3)	-0.0978873	-0.206831	0.0110565	0.0782221	0.688121
Connectivity between AN and CN	Pubs/social clubs (group 1)	-0.0739885	-0.156452	0.00847512	0.0786494	0.688121
Connectivity between right FPN and ECN	Cumulative activity	0.0142723	-0.00163529	0.0301799	0.0786578	0.688121
Connectivity between left FPN and posterior DMN2	Pubs/social clubs (group 3)	-0.0537602	-0.113688	0.00616804	0.0786993	0.688121
Connectivity between right FPN and right CON	Religious activities (group 1)	0.135109	-0.0157464	0.285965	0.079186	0.688121
Connectivity between posterior DMN and CN	Adult educational classes (group 1)	-0.0772012	-0.163411	0.00900859	0.0792247	0.688121
Connectivity between posterior DMN and right CON	Religious activities (group 2)	0.120963	-0.0141525	0.256078	0.0793079	0.688121
Connectivity between CN and precuneus/PCC DMN	Adult educational classes (group 1)	-0.0755085	-0.159855	0.00883793	0.0793203	0.688121
Connectivity between SMN and right FPN	Adult educational classes (group 3)	-0.100806	-0.213445	0.0118317	0.0794078	0.688121
Connectivity between lateral VN and medial VN2	Leisure-time computer use (group 1)	-0.180879	-0.383135	0.021377	0.0796265	0.688121
Connectivity between left CON and AN2	Religious activities (group 2)	-0.119765	-0.253688	0.0141573	0.0796332	0.688121
Connectivity between CN and BGN	Sports club/gym attendance (group 2)	0.067054	-0.00793663	0.142045	0.0796743	0.688121
Connectivity between AN2 and BGN	Pubs/social clubs (group 1)	-0.0741747	-0.157152	0.0088022	0.0797569	0.688121
Connectivity between SMN and BGN	Sports club/gym attendance (group 3)	0.0480214	-0.00571511	0.101758	0.0798493	0.688121
Connectivity between anterior DMN and posterior DMN2	Leisure-time computer use (group 2)	-0.142209	-0.301352	0.0169339	0.0798669	0.688121
Connectivity between anterior DMN and left FPN	Sports club/gym attendance (group 3)	-0.0484231	-0.102632	0.00578543	0.0799746	0.688121
Connectivity between medial VN and medial VN2	Family and friend visits (group 2)	-0.0933202	-0.197811	0.0111705	0.080035	0.688121
Connectivity between medial VN2 and SMN2	Religious activities (group 3)	0.0522748	-0.00629641	0.110846	0.0802365	0.688121
Connectivity between posterior DMN and SMN3	Leisure-time computer use (group 2)	0.142814	-0.0172109	0.302838	0.0802539	0.688121
Connectivity between right FPN and posterior DMN	Leisure-time computer use (group 2)	0.143213	-0.0173019	0.303728	0.0803347	0.688121
Connectivity between CN and right CON	Adult educational classes (group 1)	-0.0766989	-0.162689	0.00929079	0.0804213	0.688121
Connectivity between anterior DMN and CN	Family and friend visits (group 2)	-0.0917431	-0.194634	0.0111478	0.0805233	0.688121
Connectivity between left FPN and lateral VN2	Family and friend visits (group 1)	0.0978556	-0.0119306	0.207642	0.0806339	0.688121
Connectivity between left FPN and CN	Family and friend visits (group 2)	0.0927302	-0.0114274	0.196888	0.0809882	0.69017
Volume of GM in cingulate gyrus posterior division average	Leisure-time computer use (group 2)	0.102126	-0.0127396	0.216991	0.0813973	0.690259
Volume of GM in superior frontal gyrus average	Sports club/gym attendance (group 1)	0.0556201	-0.0069139	0.118154	0.0812786	0.690259
Volume of GM in superior frontal gyrus average	Family and friend visits (group 2)	0.077167	-0.00960181	0.163936	0.0813119	0.690259
Connectivity between anterior DMN and medial VN2	Family and friend visits (group 3)	0.0712789	-0.00890757	0.151465	0.0814578	0.690259
Connectivity between anterior DMN and medial VN2	Sports club/gym attendance (group 1)	0.0671354	-0.00841805	0.142689	0.0815719	0.690259
Connectivity between left CON and precuneus/PCC DMN	Family and friend visits (group 2)	-0.0924887	-0.196659	0.0116816	0.0818196	0.690259
Connectivity between anterior DMN2 and lateral VN2	Adult educational classes (group 1)	-0.0765819	-0.162857	0.00969348	0.0818938	0.690259
Connectivity between posterior DMN2 and SMN2	Adult educational classes (group 1)	0.0765056	-0.0096891	0.1627	0.0819125	0.690259
Connectivity between posterior DMN2 and SMN2	Sports club/gym attendance (group 1)	0.0668584	-0.00850732	0.142224	0.0820748	0.690663
Weighted mean MD in tract acoustic radiation average	Family and friend visits (group 2)	-0.0917888	-0.195346	0.0117687	0.0823385	0.691918
Volume of GM in frontal operculum cortex average	Leisure-time computer use (group 1)	0.154373	-0.019869	0.328615	0.0824724	0.692081
Volume of GM in inferior temporal gyrus temporooccipital part average	Leisure-time computer use (group 3)	0.107311	-0.0138584	0.228481	0.0825905	0.692111
Weighted mean MD in tract superior longitudinal fasciculus average	Sports club/gym attendance (group 3)	0.0446491	-0.0058796	0.0951777	0.0832824	0.696574
Weighted mean MD in tract superior longitudinal fasciculus average	Adult educational classes (group 2)	0.080247	-0.0105883	0.171082	0.0833536	0.696574
Volume of GM in vermis crus ii cerebellum average	Religious activities (group 2)	0.11711	-0.0155254	0.249745	0.0835241	0.697034
Connectivity between posterior DMN and lateral VN2	Sports club/gym attendance (group 1)	-0.0665796	-0.142037	0.00887807	0.0837351	0.697831
Global WMH volume	Religious activities (group 2)	0.0996079	-0.0139236	0.213139	0.0854967	0.698913
Global GM volume	Adult educational classes (group 1)	0.0364872	-0.00546476	0.0784391	0.0882484	0.698913
Volume of GM in cuneal cortex average	Family and friend visits (group 1)	0.0832483	-0.0123949	0.178891	0.0880047	0.698913
Volume of GM in superior temporal gyrus anterior division average	Pubs/social clubs (group 1)	-0.0621735	-0.133503	0.00915578	0.0875548	0.698913
Volume of GM in superior temporal gyrus anterior division average	Adult educational classes (group 2)	-0.0724785	-0.155778	0.0108209	0.0881174	0.698913
Volume of GM in temporal fusiform cortex anterior division average	Leisure-time computer use (group 1)	0.145287	-0.0207236	0.311298	0.0862811	0.698913
Volume of GM in v cerebellum average	Cumulative activity	-0.01222	-0.0262517	0.00181164	0.0878282	0.698913
Volume of GM in vermis crus i cerebellum average	Pubs/social clubs (group 3)	-0.0524547	-0.112662	0.00775248	0.0877017	0.698913
Volume of GM in vermis crus ii cerebellum average	Pubs/social clubs (group 3)	-0.0521748	-0.111495	0.00714527	0.0847198	0.698913
Weighted mean FA in tract inferior frontooccipital fasciculus average	Adult educational classes (group 3)	-0.0945791	-0.203375	0.0142167	0.0883987	0.698913
Weighted mean MD in tract acoustic radiation average	Religious activities (group 2)	0.11603	-0.0173871	0.249447	0.08827	0.698913
Weighted mean MD in tract inferior frontooccipital fasciculus average	Family and friend visits (group 1)	-0.0888018	-0.190504	0.0129003	0.0870054	0.698913
Weighted mean MD in tract superior longitudinal fasciculus average	Family and friend visits (group 3)	-0.0656165	-0.140361	0.00912769	0.085311	0.698913
Connectivity between medial VN2 and CN	Adult educational classes (group 2)	0.0857165	-0.0115156	0.182949	0.084008	0.698913
Connectivity between posterior DMN2 and ECN	Religious activities (group 3)	-0.0518205	-0.11066	0.00701883	0.0843086	0.698913
Connectivity between left FPN and precuneus/PCC DMN	Sports club/gym attendance (group 2)	-0.0669617	-0.143176	0.00925244	0.0850557	0.698913
Connectivity between anterior DMN2 and right CON	Pubs/social clubs (group 3)	0.052344	-0.00723538	0.111923	0.0850701	0.698913
Connectivity between lateral VN and SMN	Pubs/social clubs (group 2)	0.0740693	-0.0102395	0.158378	0.085074	0.698913
Connectivity between anterior DMN and lateral VN2	Family and friend visits (group 3)	0.0701966	-0.0097202	0.150113	0.0851368	0.698913
Connectivity between SMN and medial VN	Religious activities (group 3)	-0.0516975	-0.11056	0.00716527	0.0851721	0.698913
Connectivity between SMN3 and CN	Sports club/gym attendance (group 1)	0.0643312	-0.00903347	0.137696	0.0856718	0.698913
Connectivity between left CON and precuneus/PCC DMN	Religious activities (group 2)	0.117592	-0.0166151	0.251799	0.0859116	0.698913
Connectivity between anterior DMN and left FPN	Adult educational classes (group 3)	-0.0989469	-0.211876	0.0139827	0.0859173	0.698913
Connectivity between posterior DMN2 and left CON	Family and friend visits (group 3)	-0.0697887	-0.149448	0.00987042	0.0859496	0.698913
Connectivity between posterior DMN and posterior DMN2	Religious activities (group 1)	-0.131616	-0.281935	0.0187036	0.0861349	0.698913
Connectivity between lateral VN and BGN	Pubs/social clubs (group 2)	-0.0737691	-0.158032	0.010494	0.0861755	0.698913
Connectivity between lateral VN and posterior DMN	Adult educational classes (group 1)	0.0750121	-0.0108113	0.160836	0.0866907	0.698913
Connectivity between anterior DMN and SMN	Sports club/gym attendance (group 3)	-0.0471244	-0.101044	0.00679563	0.0867123	0.698913
Connectivity between posterior DMN and anterior DMN2	Religious activities (group 1)	-0.132235	-0.283592	0.0191215	0.0868215	0.698913
Connectivity between medial VN and AN2	Religious activities (group 3)	-0.0514058	-0.110247	0.00743492	0.0868296	0.698913
Connectivity between SMN and SMN2	Sports club/gym attendance (group 3)	0.0473024	-0.00686392	0.101469	0.0869606	0.698913
Connectivity between lateral VN2 and precuneus/PCC DMN	Family and friend visits (group 1)	-0.0956195	-0.205143	0.0139038	0.0870432	0.698913
Connectivity between left FPN and BGN	Religious activities (group 1)	-0.131823	-0.283036	0.019391	0.0875099	0.698913
Connectivity between posterior DMN2 and AN	Sports club/gym attendance (group 2)	-0.0665598	-0.14295	0.00983075	0.0876753	0.698913
Connectivity between AN and ECN	Sports club/gym attendance (group 3)	0.0471946	-0.00699147	0.101381	0.0877977	0.698913
Connectivity between lateral VN and SMN	Family and friend visits (group 1)	-0.0958263	-0.205889	0.0142364	0.0879147	0.698913
Connectivity between anterior DMN and AN	Family and friend visits (group 2)	0.0910559	-0.0136153	0.195727	0.0881806	0.698913
Connectivity between lateral VN and SMN2	Religious activities (group 2)	-0.116827	-0.251144	0.017489	0.0882285	0.698913
Connectivity between right FPN and anterior DMN2	Sports club/gym attendance (group 1)	-0.065412	-0.140669	0.00984478	0.088451	0.698913
Connectivity between posterior DMN and right CON	Adult educational classes (group 3)	0.0981498	-0.0148205	0.21112	0.0885878	0.698913
Connectivity between ECN and right CON	Cumulative activity	-0.0136559	-0.0293748	0.002063	0.0886077	0.698913
Connectivity between lateral VN and posterior DMN2	Leisure-time computer use (group 3)	0.122144	-0.0185035	0.262791	0.0887237	0.698916
Volume of GM in inferior temporal gyrus temporooccipital part average	Family and friend visits (group 3)	0.0587878	-0.00914545	0.126721	0.089855	0.699937
Volume of GM in supramarginal gyrus anterior division average	Sports club/gym attendance (group 3)	0.0420393	-0.0064489	0.0905274	0.0892539	0.699937
Volume of GM in v cerebellum average	Pubs/social clubs (group 3)	-0.0461097	-0.0993952	0.00717576	0.0898707	0.699937
Weighted mean MD in tract forceps minor average	Adult educational classes (group 3)	0.094476	-0.0145652	0.203517	0.0894666	0.699937
Connectivity between medial VN2 and CN	Family and friend visits (group 2)	0.0907552	-0.013852	0.195362	0.0890399	0.699937
Connectivity between SMN3 and BGN	Family and friend visits (group 3)	-0.0683549	-0.147154	0.0104442	0.0890854	0.699937
Connectivity between SMN and CN	Pubs/social clubs (group 1)	-0.0718768	-0.154855	0.0111017	0.0895458	0.699937
Connectivity between lateral VN and lateral VN2	Family and friend visits (group 1)	-0.0940486	-0.202697	0.0145999	0.0897636	0.699937
Connectivity between posterior DMN2 and SMN3	Adult educational classes (group 2)	0.0837465	-0.0130405	0.180533	0.0898959	0.699937
Connectivity between lateral VN and SMN3	Sports club/gym attendance (group 3)	-0.0467919	-0.100891	0.00730759	0.0900231	0.700025
Global WMH volume	Family and friend visits (group 1)	-0.0798677	-0.172326	0.0125907	0.0904325	0.700413
Weighted mean FA in tract anterior thalamic radiation average	Leisure-time computer use (group 3)	-0.117306	-0.253148	0.0185365	0.0905367	0.700413
Weighted mean MD in tract inferior frontooccipital fasciculus average	Leisure-time computer use (group 2)	0.128354	-0.0202288	0.276938	0.0904204	0.700413
Connectivity between right FPN and SMN3	Sports club/gym attendance (group 3)	-0.0466994	-0.100765	0.00736639	0.0904594	0.700413
Connectivity between SMN and left CON	Sports club/gym attendance (group 2)	-0.0658959	-0.142251	0.0104595	0.0907343	0.701044
Connectivity between medial VN2 and anterior DMN2	Leisure-time computer use (group 2)	-0.138133	-0.298298	0.0220312	0.0909473	0.701792
Volume of GM in cingulate gyrus posterior division average	Sports club/gym attendance (group 2)	-0.047146	-0.101911	0.00761932	0.091538	0.701869
Volume of GM in supramarginal gyrus anterior division average	Leisure-time computer use (group 1)	0.156513	-0.0251574	0.338183	0.0912942	0.701869
Weighted mean MD in tract parahippocampal part of cingulum average	Cumulative activity	-0.0133359	-0.0288122	0.00214044	0.0912287	0.701869
Connectivity between SMN and precuneus/PCC DMN	Religious activities (group 2)	-0.116372	-0.251492	0.0187479	0.0913963	0.701869
Connectivity between lateral VN and AN	Sports club/gym attendance (group 1)	-0.0650097	-0.140524	0.0105044	0.09153	0.701869
Volume of GM in heschls gyrus includes h1 and h2 average	Family and friend visits (group 3)	0.0554813	-0.00899333	0.119956	0.0916736	0.702018
Connectivity between lateral VN2 and precuneus/PCC DMN	Religious activities (group 2)	-0.115656	-0.250145	0.0188326	0.0918791	0.702319
Connectivity between anterior DMN and left FPN	Sports club/gym attendance (group 2)	-0.0658703	-0.142482	0.0107415	0.0919454	0.702319
Weighted mean FA in tract superior longitudinal fasciculus average	Leisure-time computer use (group 3)	-0.118656	-0.256849	0.0195381	0.0923905	0.702358
Connectivity between lateral VN and lateral VN2	Religious activities (group 2)	-0.114657	-0.24807	0.0187555	0.0920876	0.702358
Connectivity between AN and CN	Sports club/gym attendance (group 2)	0.0649978	-0.0106749	0.14067	0.0922709	0.702358
Connectivity between medial VN and left FPN	Pubs/social clubs (group 2)	-0.072036	-0.15594	0.011868	0.0924155	0.702358
Volume of hippocampus average	Sports club/gym attendance (group 2)	-0.0579758	-0.125579	0.0096273	0.0927809	0.702484
Connectivity between left FPN and ECN	Religious activities (group 2)	-0.115212	-0.249494	0.0190694	0.0926292	0.702484
Connectivity between CN and AN2	Leisure-time computer use (group 2)	0.135958	-0.0225625	0.294478	0.0927515	0.702484
Weighted mean MD in tract forceps major average	Adult educational classes (group 1)	-0.0738136	-0.159919	0.0122916	0.0929112	0.70259
Connectivity between medial VN and right CON	Family and friend visits (group 2)	-0.0898828	-0.194787	0.0150212	0.0930786	0.702733
Connectivity between posterior DMN2 and ECN	Sports club/gym attendance (group 1)	-0.0646472	-0.140128	0.0108338	0.0932085	0.702733
Connectivity between posterior DMN2 and anterior DMN2	Adult educational classes (group 1)	-0.0737951	-0.159976	0.0123854	0.093279	0.702733
Weighted mean MD in tract cingulate gyrus part of cingulum average	Leisure-time computer use (group 1)	0.169375	-0.0285396	0.367291	0.0934652	0.703259
Connectivity between medial VN and BGN	Leisure-time computer use (group 2)	-0.137014	-0.297186	0.0231575	0.0936102	0.703473
Volume of GM in supramarginal gyrus posterior division average	Adult educational classes (group 1)	-0.0650595	-0.141167	0.0110476	0.0938323	0.704266
Volume of GM in crus i cerebellum average	Religious activities (group 2)	0.1004	-0.0175281	0.218328	0.0951751	0.706661
Volume of GM in insular cortex average	Adult educational classes (group 2)	-0.0589408	-0.128108	0.0102261	0.0948697	0.706661
Volume of GM in precentral gyrus average	Adult educational classes (group 3)	0.0754172	-0.0131956	0.16403	0.0952837	0.706661
Volume of GM in temporal fusiform cortex anterior division average	Sports club/gym attendance (group 2)	-0.0533546	-0.116003	0.00929408	0.0950657	0.706661
Connectivity between anterior DMN2 and AN2	Pubs/social clubs (group 3)	-0.050802	-0.110355	0.0087509	0.09452	0.706661
Connectivity between SMN and CN	Family and friend visits (group 2)	0.0887533	-0.0155094	0.193016	0.0952215	0.706661
Connectivity between lateral VN and medial VN2	Leisure-time computer use (group 2)	-0.136197	-0.296239	0.0238458	0.0953162	0.706661
Connectivity between medial VN and BGN	Adult educational classes (group 3)	-0.0957613	-0.208305	0.0167826	0.0953643	0.706661
Connectivity between ECN and AN2	Sports club/gym attendance (group 1)	-0.0640928	-0.139419	0.0112334	0.0953682	0.706661
Connectivity between SMN2 and AN	Religious activities (group 1)	0.127769	-0.0223956	0.277934	0.0953719	0.706661
Connectivity between left FPN and posterior DMN	Adult educational classes (group 2)	0.0823796	-0.0144589	0.179218	0.0954379	0.706661
Volume of amygdala average	Leisure-time computer use (group 1)	-0.158336	-0.345729	0.0290575	0.097699	0.707645
Volume of GM in frontal operculum cortex average	Religious activities (group 3)	0.0427999	-0.00774916	0.0933489	0.0970019	0.707645
Volume of GM in inferior temporal gyrus posterior division average	Adult educational classes (group 1)	-0.0616655	-0.134377	0.0110462	0.0964578	0.707645
Volume of GM in middle frontal gyrus average	Adult educational classes (group 1)	0.0587386	-0.0113872	0.128864	0.100638	0.707645
Volume of GM in paracingulate gyrus average	Sports club/gym attendance (group 2)	0.0520836	-0.00946645	0.113634	0.0971998	0.707645
Volume of GM in parahippocampal gyrus posterior division average	Adult educational classes (group 2)	-0.0731497	-0.159273	0.012974	0.0959586	0.707645
Volume of GM in parietal operculum cortex average	Sports club/gym attendance (group 1)	0.0517907	-0.00989645	0.113478	0.0998476	0.707645
Volume of GM in vermis crus i cerebellum average	Leisure-time computer use (group 1)	-0.171058	-0.373338	0.0312228	0.0974185	0.707645
Volume of GM in x cerebellum average	Leisure-time computer use (group 3)	0.105882	-0.0189952	0.230759	0.0965337	0.707645
Volume of hippocampus average	Pubs/social clubs (group 2)	0.0627191	-0.0116172	0.137055	0.0981831	0.707645
Volume of hippocampus average	Religious activities (group 3)	-0.0438215	-0.0957912	0.00814823	0.0983859	0.707645
Volume of pallidum average	Sports club/gym attendance (group 3)	0.0402544	-0.00743926	0.0879481	0.0980639	0.707645
Volume of thalamus average	Cumulative activity	0.00924351	-0.00168501	0.020172	0.0973514	0.707645
Global WM volume	Leisure-time computer use (group 1)	0.086008	-0.0155302	0.187546	0.0968638	0.707645
Global WM volume	Pubs/social clubs (group 3)	-0.0253703	-0.0555719	0.00483122	0.0996605	0.707645
Weighted mean FA in tract forceps minor average	Adult educational classes (group 3)	-0.090735	-0.198199	0.0167293	0.0979419	0.707645
Weighted mean FA in tract superior thalamic radiation average	Religious activities (group 2)	-0.110031	-0.2411	0.021039	0.0998832	0.707645
Weighted mean MD in tract forceps minor average	Religious activities (group 1)	-0.123245	-0.269268	0.0227768	0.0980645	0.707645
Weighted mean MD in tract superior thalamic radiation average	Adult educational classes (group 3)	0.0877726	-0.0164468	0.191992	0.098794	0.707645
Connectivity between posterior DMN and precuneus/PCC DMN	Sports club/gym attendance (group 3)	-0.0455946	-0.0993431	0.00815393	0.0963744	0.707645
Connectivity between SMN3 and AN2	Leisure-time computer use (group 2)	-0.134925	-0.294036	0.0241862	0.0964934	0.707645
Connectivity between posterior DMN and AN	Pubs/social clubs (group 1)	0.0705504	-0.0127122	0.153813	0.0967559	0.707645
Connectivity between left FPN and lateral VN2	Leisure-time computer use (group 1)	-0.171655	-0.374338	0.0310282	0.0969181	0.707645
Connectivity between lateral VN and SMN2	Religious activities (group 1)	-0.127279	-0.277739	0.0231805	0.0973039	0.707645
Connectivity between posterior DMN2 and left CON	Cumulative activity	-0.0133559	-0.0291532	0.00244133	0.0974927	0.707645
Connectivity between SMN and left FPN	Leisure-time computer use (group 1)	0.171958	-0.0314525	0.375369	0.0975261	0.707645
Connectivity between right FPN and lateral VN2	Leisure-time computer use (group 3)	0.120799	-0.0222207	0.263818	0.0978207	0.707645
Connectivity between SMN and medial VN2	Sports club/gym attendance (group 3)	-0.045584	-0.0996244	0.00845651	0.098265	0.707645
Connectivity between AN and CN	Pubs/social clubs (group 2)	-0.0702198	-0.153493	0.0130536	0.0983732	0.707645
Connectivity between anterior DMN and precuneus/PCC DMN	Leisure-time computer use (group 2)	-0.131944	-0.288513	0.0246262	0.0985848	0.707645
Connectivity between lateral VN and left FPN	Sports club/gym attendance (group 1)	-0.0633931	-0.138627	0.0118404	0.0986233	0.707645
Connectivity between anterior DMN and medial VN	Adult educational classes (group 3)	-0.0947604	-0.207331	0.0178107	0.0989574	0.707645
Connectivity between medial VN and ECN	Adult educational classes (group 1)	0.0720453	-0.0135882	0.157679	0.0991427	0.707645
Connectivity between left CON and right CON	Leisure-time computer use (group 3)	-0.119754	-0.262137	0.0226296	0.0992454	0.707645
Connectivity between posterior DMN2 and right CON	Adult educational classes (group 1)	0.072594	-0.013749	0.158937	0.099367	0.707645
Connectivity between posterior DMN and BGN	Adult educational classes (group 2)	-0.0819284	-0.179444	0.0155874	0.0996117	0.707645
Connectivity between CN and precuneus/PCC DMN	Pubs/social clubs (group 1)	-0.0683072	-0.149699	0.0130843	0.09998	0.707645
Connectivity between posterior DMN and medial VN2	Sports club/gym attendance (group 2)	-0.0639321	-0.140122	0.0122573	0.100029	0.707645
Connectivity between anterior DMN2 and precuneus/PCC DMN	Sports club/gym attendance (group 3)	0.045061	-0.00865022	0.0987722	0.100099	0.707645
Connectivity between anterior DMN and lateral VN2	Family and friend visits (group 1)	0.0918897	-0.0177376	0.201517	0.100402	0.707645
Connectivity between medial VN and right CON	Religious activities (group 2)	0.113269	-0.0218647	0.248402	0.100403	0.707645
Connectivity between medial VN and right CON	Religious activities (group 1)	0.126858	-0.024517	0.278233	0.100468	0.707645
Connectivity between right FPN and lateral VN2	Religious activities (group 3)	-0.0493414	-0.108243	0.00955986	0.100606	0.707645
Connectivity between posterior DMN2 and SMN2	Family and friend visits (group 3)	0.0669624	-0.0130275	0.146952	0.100834	0.707645
Connectivity between right FPN and left CON	Sports club/gym attendance (group 2)	-0.0632266	-0.13878	0.0123269	0.100953	0.707645
Connectivity between right FPN and SMN2	Adult educational classes (group 3)	0.0942284	-0.0184312	0.206888	0.101134	0.707645
Connectivity between posterior DMN and right CON	Pubs/social clubs (group 1)	-0.0697925	-0.153237	0.0136517	0.101135	0.707645
Connectivity between right FPN and SMN3	Leisure-time computer use (group 2)	-0.133954	-0.294136	0.0262287	0.101192	0.707645
Volume of GM in parahippocampal gyrus posterior division average	Adult educational classes (group 3)	0.0833327	-0.0164532	0.183119	0.101659	0.70936
Volume of GM in temporal occipital fusiform cortex average	Adult educational classes (group 3)	0.0771714	-0.0152692	0.169612	0.10178	0.70936
Volume of GM in vermis crus i cerebellum average	Family and friend visits (group 2)	0.0871869	-0.0172899	0.191664	0.101907	0.70936
Connectivity between left CON and right CON	Leisure-time computer use (group 2)	-0.133522	-0.293515	0.0264706	0.10189	0.70936
Global GM volume	Religious activities (group 3)	-0.0234813	-0.0520794	0.00511673	0.107538	0.710782
Global GM volume	Leisure-time computer use (group 1)	0.0807836	-0.0178219	0.179389	0.108319	0.710782
Volume of GM in brainstem average	Religious activities (group 3)	-0.0427963	-0.0955414	0.00994886	0.111757	0.710782
Volume of GM in cingulate gyrus posterior division average	Adult educational classes (group 3)	0.0662114	-0.0145178	0.146941	0.10793	0.710782
Volume of GM in frontal medial cortex average	Adult educational classes (group 2)	-0.0732629	-0.1613	0.014774	0.102865	0.710782
Volume of GM in frontal pole average	Sports club/gym attendance (group 2)	-0.0419207	-0.0931442	0.00930273	0.108695	0.710782
Volume of GM in heschls gyrus includes h1 and h2 average	Adult educational classes (group 2)	-0.0644674	-0.142838	0.0139035	0.106892	0.710782
Volume of GM in iiv cerebellum average	Adult educational classes (group 3)	-0.0829323	-0.18589	0.0200255	0.114377	0.710782
Volume of GM in inferior frontal gyrus pars triangularis average	Leisure-time computer use (group 2)	0.120488	-0.0262158	0.267193	0.107443	0.710782
Volume of GM in inferior temporal gyrus temporooccipital part average	Leisure-time computer use (group 2)	0.111209	-0.0249465	0.247365	0.109392	0.710782
Volume of GM in insular cortex average	Religious activities (group 1)	-0.0882389	-0.195612	0.0191338	0.10723	0.710782
Volume of GM in intracalcarine cortex average	Religious activities (group 3)	-0.044149	-0.0971941	0.00889606	0.102821	0.710782
Volume of GM in lingual gyrus average	Religious activities (group 3)	-0.0351817	-0.0777255	0.00736212	0.105047	0.710782
Volume of GM in middle temporal gyrus posterior division average	Pubs/social clubs (group 2)	0.0543847	-0.0122609	0.12103	0.109719	0.710782
Volume of GM in planum temporale average	Family and friend visits (group 1)	0.0717309	-0.0164863	0.159948	0.110991	0.710782
Volume of GM in subcallosal cortex average	Religious activities (group 3)	0.0339983	-0.00812377	0.0761204	0.113642	0.710782
Volume of GM in temporal fusiform cortex anterior division average	Religious activities (group 3)	0.039047	-0.00912091	0.0872149	0.112082	0.710782
Volume of GM in ventral striatum average	Family and friend visits (group 2)	0.072677	-0.0152816	0.160636	0.105336	0.710782
Volume of GM in ventral striatum average	Sports club/gym attendance (group 2)	-0.0518911	-0.11616	0.0123777	0.113521	0.710782
Volume of GM in vermis crus i cerebellum average	Religious activities (group 3)	-0.0473287	-0.106034	0.0113763	0.114056	0.710782
Volume of GM in vermis vi cerebellum average	Leisure-time computer use (group 2)	0.126513	-0.0259003	0.278926	0.103744	0.710782
Volume of GM in vermis viiia cerebellum average	Pubs/social clubs (group 3)	-0.0459912	-0.10258	0.0105976	0.111163	0.710782
Volume of GM in vermis viiib cerebellum average	Adult educational classes (group 3)	0.0885214	-0.0179584	0.195001	0.103213	0.710782
Volume of GM in vi cerebellum average	Family and friend visits (group 1)	-0.0767023	-0.169987	0.0165825	0.107043	0.710782
Volume of GM in vi cerebellum average	Leisure-time computer use (group 3)	0.0993263	-0.0219688	0.220621	0.108483	0.710782
Volume of GM in vi cerebellum average	Leisure-time computer use (group 2)	0.110371	-0.0259256	0.246668	0.112462	0.710782
Volume of GM in viib cerebellum average	Cumulative activity	-0.0118217	-0.0262174	0.00257402	0.107489	0.710782
Volume of pallidum average	Leisure-time computer use (group 1)	0.144715	-0.0340153	0.323445	0.112507	0.710782
Weighted mean FA in tract cingulate gyrus part of cingulum average	Religious activities (group 3)	-0.046324	-0.103324	0.0106762	0.111175	0.710782
Weighted mean FA in tract inferior longitudinal fasciculus average	Family and friend visits (group 1)	0.0850196	-0.0203965	0.190436	0.113921	0.710782
Weighted mean FA in tract medial lemniscus average	Religious activities (group 2)	-0.107106	-0.236963	0.0227503	0.105953	0.710782
Weighted mean FA in tract middle cerebellar peduncle average	Sports club/gym attendance (group 2)	0.0616547	-0.0129107	0.13622	0.105088	0.710782
Weighted mean MD in tract anterior thalamic radiation average	Family and friend visits (group 3)	-0.0568732	-0.125892	0.0121459	0.106284	0.710782
Weighted mean MD in tract anterior thalamic radiation average	Family and friend visits (group 1)	-0.0764368	-0.171115	0.0182412	0.113554	0.710782
Weighted mean MD in tract corticospinal tract average	Family and friend visits (group 1)	-0.0872578	-0.195276	0.0207604	0.113343	0.710782
Weighted mean MD in tract inferior frontooccipital fasciculus average	Leisure-time computer use (group 1)	0.151792	-0.035982	0.339566	0.113089	0.710782
Weighted mean MD in tract superior longitudinal fasciculus average	Religious activities (group 1)	-0.117199	-0.258201	0.0238031	0.103279	0.710782
Connectivity between lateral VN and right FPN	Religious activities (group 2)	-0.112023	-0.246547	0.0225006	0.102636	0.710782
Connectivity between AN and ECN	Adult educational classes (group 3)	0.0939833	-0.018909	0.206876	0.102733	0.710782
Connectivity between anterior DMN and right CON	Adult educational classes (group 1)	-0.0716804	-0.157794	0.0144334	0.10278	0.710782
Connectivity between left CON and precuneus/PCC DMN	Pubs/social clubs (group 1)	-0.0689976	-0.151904	0.0139084	0.102843	0.710782
Connectivity between lateral VN and precuneus/PCC DMN	Family and friend visits (group 1)	-0.0913605	-0.201317	0.0185961	0.103406	0.710782
Connectivity between posterior DMN and AN	Sports club/gym attendance (group 1)	-0.0626092	-0.13801	0.0127919	0.103626	0.710782
Connectivity between CN and right CON	Cumulative activity	-0.0131365	-0.0289588	0.00268579	0.103666	0.710782
Connectivity between SMN2 and precuneus/PCC DMN	Family and friend visits (group 2)	-0.0866041	-0.19116	0.0179514	0.104478	0.710782
Connectivity between anterior DMN2 and right CON	Adult educational classes (group 1)	-0.0705928	-0.155821	0.0146355	0.10449	0.710782
Connectivity between lateral VN and left FPN	Sports club/gym attendance (group 3)	-0.0446691	-0.0986447	0.00930661	0.104784	0.710782
Connectivity between anterior DMN2 and CN	Family and friend visits (group 2)	-0.0858916	-0.189695	0.0179115	0.104839	0.710782
Connectivity between right FPN and BGN	Family and friend visits (group 2)	0.0859065	-0.0179293	0.189742	0.104888	0.710782
Connectivity between SMN and posterior DMN2	Leisure-time computer use (group 2)	-0.13276	-0.293306	0.0277852	0.105055	0.710782
Connectivity between medial VN and posterior DMN2	Religious activities (group 1)	-0.124235	-0.274477	0.026007	0.105069	0.710782
Connectivity between SMN and AN	Pubs/social clubs (group 2)	-0.0698076	-0.154258	0.014643	0.105191	0.710782
Connectivity between anterior DMN and medial VN	Religious activities (group 1)	-0.124579	-0.275407	0.0262494	0.105462	0.710782
Connectivity between left FPN and lateral VN2	Pubs/social clubs (group 3)	-0.0497549	-0.110047	0.0105375	0.105774	0.710782
Connectivity between left FPN and precuneus/PCC DMN	Adult educational classes (group 3)	0.0926756	-0.0196334	0.204985	0.105792	0.710782
Connectivity between SMN and anterior DMN2	Cumulative activity	0.0130146	-0.00279984	0.0288291	0.106737	0.710782
Connectivity between AN and CN	Family and friend visits (group 1)	0.0894589	-0.01928	0.198198	0.106848	0.710782
Connectivity between SMN3 and anterior DMN2	Cumulative activity	-0.0130189	-0.0288536	0.00281571	0.107068	0.710782
Connectivity between medial VN2 and BGN	Adult educational classes (group 2)	-0.0800742	-0.177486	0.0173377	0.107138	0.710782
Connectivity between anterior DMN and BGN	Religious activities (group 2)	0.110199	-0.0240637	0.244462	0.10767	0.710782
Connectivity between SMN3 and AN2	Leisure-time computer use (group 1)	-0.164977	-0.366057	0.0361016	0.107804	0.710782
Connectivity between lateral VN and medial VN2	Leisure-time computer use (group 3)	-0.116842	-0.25927	0.0255851	0.107845	0.710782
Connectivity between lateral VN and right CON	Religious activities (group 1)	0.12372	-0.0271229	0.274563	0.107919	0.710782
Connectivity between anterior DMN2 and ECN	Family and friend visits (group 3)	-0.0652879	-0.144895	0.0143193	0.107948	0.710782
Connectivity between medial VN2 and BGN	Religious activities (group 3)	-0.0482538	-0.107122	0.0106139	0.108131	0.710782
Connectivity between SMN and medial VN	Family and friend visits (group 2)	0.0858965	-0.0188994	0.190692	0.10815	0.710782
Connectivity between medial VN2 and right CON	Family and friend visits (group 1)	-0.0900396	-0.19995	0.0198707	0.108341	0.710782
Connectivity between right FPN and AN	Sports club/gym attendance (group 2)	-0.0626215	-0.139066	0.013823	0.108356	0.710782
Connectivity between left CON and anterior DMN2	Cumulative activity	0.0129994	-0.00287185	0.0288706	0.108409	0.710782
Connectivity between posterior DMN and BGN	Pubs/social clubs (group 3)	0.0494621	-0.0109524	0.109877	0.108556	0.710782
Connectivity between medial VN2 and BGN	Religious activities (group 2)	-0.110418	-0.245415	0.0245785	0.108893	0.710782
Connectivity between posterior DMN2 and ECN	Pubs/social clubs (group 3)	-0.0493437	-0.109681	0.0109932	0.108949	0.710782
Connectivity between SMN2 and lateral VN2	Cumulative activity	0.0129563	-0.00289155	0.0288042	0.109061	0.710782
Connectivity between ECN and AN2	Cumulative activity	-0.0129584	-0.0288164	0.00289964	0.109232	0.710782
Connectivity between right FPN and AN2	Pubs/social clubs (group 2)	0.0683907	-0.0153712	0.152153	0.109518	0.710782
Connectivity between SMN3 and right CON	Pubs/social clubs (group 1)	-0.0672359	-0.149592	0.01512	0.109554	0.710782
Connectivity between left FPN and posterior DMN2	Religious activities (group 1)	-0.122293	-0.272406	0.0278203	0.110311	0.710782
Connectivity between left FPN and lateral VN2	Sports club/gym attendance (group 3)	0.0440715	-0.0100261	0.098169	0.110313	0.710782
Connectivity between AN and right CON	Adult educational classes (group 2)	-0.0792448	-0.176564	0.018074	0.110481	0.710782
Connectivity between CN and lateral VN2	Pubs/social clubs (group 3)	-0.0490355	-0.109277	0.0112058	0.110611	0.710782
Connectivity between left FPN and SMN3	Pubs/social clubs (group 1)	0.0674926	-0.0154263	0.150412	0.110622	0.710782
Connectivity between posterior DMN2 and lateral VN2	Leisure-time computer use (group 1)	0.164464	-0.037626	0.366554	0.110685	0.710782
Connectivity between medial VN and right FPN	Cumulative activity	-0.0129363	-0.0288428	0.00297033	0.110927	0.710782
Connectivity between CN and precuneus/PCC DMN	Family and friend visits (group 1)	-0.087268	-0.194581	0.0200451	0.110951	0.710782
Connectivity between left CON and anterior DMN2	Pubs/social clubs (group 3)	0.0490111	-0.0112745	0.109297	0.111051	0.710782
Connectivity between SMN2 and BGN	Family and friend visits (group 1)	0.08811	-0.0202985	0.196518	0.111149	0.710782
Connectivity between right FPN and AN	Cumulative activity	-0.0128959	-0.0287627	0.00297099	0.11115	0.710782
Connectivity between SMN2 and AN2	Family and friend visits (group 3)	-0.0647179	-0.144353	0.014917	0.111182	0.710782
Connectivity between medial VN and CN	Adult educational classes (group 3)	0.0911572	-0.0210487	0.203363	0.111302	0.710782
Connectivity between SMN3 and precuneus/PCC DMN	Sports club/gym attendance (group 1)	0.0610436	-0.0141058	0.136193	0.111352	0.710782
Connectivity between medial VN and BGN	Sports club/gym attendance (group 2)	-0.0619764	-0.138319	0.0143664	0.111563	0.710782
Connectivity between anterior DMN and posterior DMN2	Leisure-time computer use (group 3)	-0.114909	-0.256536	0.0267178	0.111769	0.710782
Connectivity between ECN and precuneus/PCC DMN	Pubs/social clubs (group 1)	0.0669447	-0.0156045	0.149494	0.111939	0.710782
Connectivity between medial VN2 and posterior DMN2	Leisure-time computer use (group 3)	0.115709	-0.0271129	0.258531	0.112294	0.710782
Connectivity between SMN2 and anterior DMN2	Sports club/gym attendance (group 2)	0.0618268	-0.0145305	0.138184	0.112498	0.710782
Connectivity between SMN and right FPN	Pubs/social clubs (group 1)	0.0673197	-0.0159039	0.150543	0.112855	0.710782
Connectivity between CN and AN2	Leisure-time computer use (group 3)	0.114002	-0.0270703	0.255075	0.113207	0.710782
Connectivity between posterior DMN and BGN	Sports club/gym attendance (group 2)	0.0618738	-0.0147589	0.138506	0.113521	0.710782
Connectivity between right FPN and SMN2	Pubs/social clubs (group 1)	0.067201	-0.0160432	0.150445	0.11358	0.710782
Connectivity between SMN and right FPN	Leisure-time computer use (group 3)	-0.115166	-0.257845	0.0275135	0.113629	0.710782
Connectivity between SMN and ECN	Adult educational classes (group 3)	-0.0905153	-0.202688	0.0216569	0.113734	0.710782
Connectivity between posterior DMN2 and lateral VN2	Sports club/gym attendance (group 3)	0.0434929	-0.0104582	0.0974439	0.114082	0.710782
Connectivity between left FPN and BGN	Pubs/social clubs (group 2)	-0.067863	-0.152072	0.016346	0.114202	0.710782
Connectivity between left FPN and posterior DMN2	Sports club/gym attendance (group 3)	0.043318	-0.0104597	0.0970956	0.114375	0.710782
Connectivity between SMN3 and right CON	Sports club/gym attendance (group 3)	0.0430859	-0.0104203	0.0965922	0.114488	0.710782
Connectivity between ECN and right CON	Pubs/social clubs (group 3)	-0.0480753	-0.107793	0.0116424	0.114582	0.710782
Volume of caudate average	Cumulative activity	0.0105035	-0.00255721	0.0235643	0.114959	0.711463
Volume of GM in v cerebellum average	Leisure-time computer use (group 3)	0.101411	-0.0247678	0.22759	0.115184	0.711463
Weighted mean MD in tract cingulate gyrus part of cingulum average	Cumulative activity	0.0124545	-0.00304059	0.0279495	0.115156	0.711463
Connectivity between AN and right CON	Sports club/gym attendance (group 2)	-0.0614855	-0.137985	0.0150143	0.115172	0.711463
Connectivity between CN and ECN	Leisure-time computer use (group 2)	0.127952	-0.0312921	0.287196	0.11528	0.711463
Connectivity between medial VN2 and AN2	Family and friend visits (group 3)	0.0641608	-0.0157769	0.144099	0.11567	0.713139
Volume of caudate average	Adult educational classes (group 3)	0.0743808	-0.0183514	0.167113	0.115911	0.713729
Volume of GM in supramarginal gyrus anterior division average	Family and friend visits (group 1)	0.0788421	-0.0195402	0.177224	0.116238	0.713729
Connectivity between lateral VN and left FPN	Pubs/social clubs (group 1)	0.0665973	-0.016486	0.149681	0.116153	0.713729
Connectivity between left FPN and ECN	Leisure-time computer use (group 3)	-0.113945	-0.256128	0.0282382	0.116233	0.713729
Weighted mean MD in tract forceps minor average	Religious activities (group 3)	-0.0455051	-0.102349	0.0113385	0.116627	0.713808
Weighted mean MD in tract inferior longitudinal fasciculus average	Family and friend visits (group 3)	-0.0599398	-0.134837	0.0149578	0.116738	0.713808
Connectivity between medial VN and posterior DMN2	Sports club/gym attendance (group 1)	0.0601188	-0.0149282	0.135166	0.116376	0.713808
Connectivity between left FPN and anterior DMN2	Religious activities (group 3)	0.046994	-0.0116991	0.105687	0.116563	0.713808
Connectivity between CN and BGN	Cumulative activity	0.0124544	-0.00311238	0.0280212	0.116841	0.713808
Volume of caudate average	Leisure-time computer use (group 2)	0.105186	-0.0267917	0.237165	0.118249	0.714206
Volume of GM in cingulate gyrus anterior division average	Pubs/social clubs (group 1)	0.0580604	-0.0148471	0.130968	0.118545	0.714206
Volume of GM in inferior temporal gyrus posterior division average	Pubs/social clubs (group 2)	-0.0564735	-0.12739	0.0144425	0.118552	0.714206
Volume of GM in parahippocampal gyrus anterior division average	Adult educational classes (group 3)	0.0721345	-0.0181342	0.162403	0.117278	0.714206
Volume of GM in temporal occipital fusiform cortex average	Religious activities (group 3)	-0.0383711	-0.0865802	0.00983801	0.118743	0.714206
Volume of GM in vermis x cerebellum average	Family and friend visits (group 1)	-0.0841043	-0.189779	0.0215705	0.118767	0.714206
Weighted mean MD in tract forceps minor average	Family and friend visits (group 3)	-0.0618142	-0.139247	0.0156187	0.117652	0.714206
Weighted mean MD in tract inferior frontooccipital fasciculus average	Family and friend visits (group 3)	-0.0591519	-0.133291	0.0149876	0.117858	0.714206
Weighted mean MD in tract inferior frontooccipital fasciculus average	Family and friend visits (group 2)	-0.0772997	-0.174238	0.0196386	0.118059	0.714206
Connectivity between ECN and precuneus/PCC DMN	Leisure-time computer use (group 2)	0.127131	-0.031867	0.28613	0.117064	0.714206
Connectivity between SMN and lateral VN2	Sports club/gym attendance (group 3)	-0.0427159	-0.0962218	0.01079	0.117631	0.714206
Connectivity between left FPN and anterior DMN2	Family and friend visits (group 2)	0.083371	-0.021111	0.187853	0.117812	0.714206
Connectivity between right FPN and anterior DMN2	Pubs/social clubs (group 1)	-0.0663085	-0.149454	0.016837	0.118018	0.714206
Connectivity between CN and AN2	Leisure-time computer use (group 1)	0.159605	-0.0407273	0.359938	0.118386	0.714206
Connectivity between medial VN and lateral VN2	Adult educational classes (group 1)	-0.0686562	-0.154924	0.0176119	0.118781	0.714206
Connectivity between ECN and AN2	Leisure-time computer use (group 1)	0.161186	-0.041357	0.36373	0.118798	0.714206
Volume of GM in ventral striatum average	Religious activities (group 1)	0.100954	-0.0259834	0.227892	0.119032	0.714905
Volume of GM in parahippocampal gyrus posterior division average	Religious activities (group 2)	0.0948461	-0.0245328	0.214225	0.119409	0.715031
Volume of GM in postcentral gyrus average	Family and friend visits (group 1)	0.071788	-0.0185621	0.162138	0.119382	0.715031
Volume of GM in x cerebellum average	Sports club/gym attendance (group 2)	-0.0531855	-0.120094	0.0137235	0.119224	0.715031
Volume of GM in postcentral gyrus average	Cumulative activity	0.0103729	-0.00269132	0.023437	0.119643	0.715724
Connectivity between right FPN and BGN	Family and friend visits (group 1)	-0.0863614	-0.1953	0.0225771	0.120221	0.718473
Connectivity between right FPN and anterior DMN2	Religious activities (group 3)	0.0465079	-0.0121871	0.105203	0.120403	0.718846
Connectivity between left FPN and SMN2	Cumulative activity	0.0125524	-0.00329715	0.0284019	0.120587	0.719239
Connectivity between SMN and right FPN	Sports club/gym attendance (group 3)	0.0428038	-0.0112746	0.0968823	0.120802	0.719761
Connectivity between left CON and CN	Cumulative activity	0.0125565	-0.00331217	0.0284252	0.120913	0.719761
Weighted mean MD in tract middle cerebellar peduncle average	Pubs/social clubs (group 2)	-0.0645066	-0.146073	0.0170602	0.121117	0.720263
Volume of GM in precentral gyrus average	Adult educational classes (group 2)	-0.0604628	-0.136943	0.0160174	0.121246	0.720324
Connectivity between SMN3 and right CON	Religious activities (group 3)	0.0459502	-0.0122031	0.104104	0.12144	0.720768
Connectivity between SMN2 and right CON	Leisure-time computer use (group 2)	-0.126208	-0.28602	0.0336032	0.12164	0.720771
Connectivity between posterior DMN2 and SMN2	Religious activities (group 1)	0.119181	-0.031748	0.27011	0.121679	0.720771
Volume of accumbens average	Leisure-time computer use (group 2)	0.110422	-0.0297458	0.25059	0.122562	0.723796
Volume of GM in middle temporal gyrus anterior division average	Sports club/gym attendance (group 2)	-0.0513606	-0.116548	0.0138272	0.122513	0.723796
Connectivity between lateral VN and precuneus/PCC DMN	Leisure-time computer use (group 1)	-0.159981	-0.362953	0.0429912	0.122369	0.723796
Connectivity between lateral VN and CN	Religious activities (group 2)	0.105348	-0.0284171	0.239112	0.122669	0.723796
Connectivity between anterior DMN and CN	Religious activities (group 3)	0.0454842	-0.0123191	0.103288	0.122993	0.724997
Global GM volume	Leisure-time computer use (group 2)	0.0610972	-0.016928	0.139122	0.124829	0.725855
Volume of GM in central opercular cortex average	Pubs/social clubs (group 3)	-0.035733	-0.0812182	0.00975212	0.123604	0.725855
Volume of GM in inferior temporal gyrus temporooccipital part average	Family and friend visits (group 1)	0.0718266	-0.021362	0.165015	0.130851	0.725855
Volume of GM in intracalcarine cortex average	Family and friend visits (group 3)	0.0558391	-0.0163714	0.12805	0.129598	0.725855
Volume of GM in ix cerebellum average	Leisure-time computer use (group 1)	-0.147358	-0.338285	0.0435685	0.130332	0.725855
Volume of GM in middle temporal gyrus anterior division average	Family and friend visits (group 2)	-0.0692789	-0.158495	0.0199374	0.127997	0.725855
Volume of GM in planum temporale average	Sports club/gym attendance (group 1)	0.0474153	-0.0131604	0.107991	0.124973	0.725855
Volume of GM in superior temporal gyrus anterior division average	Leisure-time computer use (group 3)	0.0953609	-0.0268901	0.217612	0.126281	0.725855
Volume of GM in supracalcarine cortex average	Family and friend visits (group 1)	0.075218	-0.0207903	0.171226	0.124632	0.725855
Volume of GM in supramarginal gyrus posterior division average	Family and friend visits (group 1)	0.0758523	-0.0210191	0.172724	0.12484	0.725855
Volume of GM in temporal occipital fusiform cortex average	Religious activities (group 2)	0.0863635	-0.0241907	0.196918	0.125725	0.725855
Volume of GM in vermis viiia cerebellum average	Family and friend visits (group 2)	0.0766023	-0.0216076	0.174812	0.126308	0.725855
Volume of GM in vi cerebellum average	Family and friend visits (group 3)	-0.0526079	-0.120611	0.0153955	0.129438	0.725855
Volume of thalamus average	Family and friend visits (group 3)	0.0426576	-0.0124571	0.0977723	0.129253	0.725855
Weighted mean FA in tract cingulate gyrus part of cingulum average	Adult educational classes (group 1)	-0.0645553	-0.14819	0.0190797	0.1303	0.725855
Weighted mean FA in tract inferior frontooccipital fasciculus average	Sports club/gym attendance (group 2)	0.0569988	-0.016822	0.13082	0.130174	0.725855
Weighted mean FA in tract middle cerebellar peduncle average	Religious activities (group 2)	-0.10187	-0.233293	0.0295523	0.128682	0.725855
Weighted mean FA in tract superior thalamic radiation average	Cumulative activity	-0.0120391	-0.0274707	0.0033925	0.126224	0.725855
Weighted mean MD in tract forceps major average	Adult educational classes (group 2)	0.0754665	-0.0216435	0.172577	0.127705	0.725855
Weighted mean MD in tract inferior longitudinal fasciculus average	Religious activities (group 2)	0.0980031	-0.0281564	0.224163	0.127854	0.725855
Weighted mean MD in tract superior longitudinal fasciculus average	Sports club/gym attendance (group 1)	0.0553401	-0.0150889	0.125769	0.123527	0.725855
Weighted mean MD in tract superior longitudinal fasciculus average	Cumulative activity	0.0115044	-0.00331932	0.0263281	0.128217	0.725855
Connectivity between posterior DMN and precuneus/PCC DMN	Cumulative activity	-0.0123823	-0.0281501	0.00338539	0.123748	0.725855
Connectivity between left FPN and posterior DMN2	Leisure-time computer use (group 3)	0.111365	-0.0305435	0.253273	0.124002	0.725855
Connectivity between left FPN and lateral VN2	Sports club/gym attendance (group 2)	0.0599735	-0.0164815	0.136429	0.124163	0.725855
Connectivity between SMN and lateral VN2	Adult educational classes (group 1)	-0.0669089	-0.152218	0.0184003	0.12422	0.725855
Connectivity between anterior DMN and lateral VN2	Sports club/gym attendance (group 1)	0.0590675	-0.0162614	0.134396	0.124307	0.725855
Connectivity between SMN3 and AN2	Leisure-time computer use (group 3)	-0.110967	-0.252566	0.0306316	0.124526	0.725855
Connectivity between medial VN and SMN2	Religious activities (group 1)	-0.11855	-0.269844	0.0327437	0.124573	0.725855
Connectivity between posterior DMN2 and anterior DMN2	Pubs/social clubs (group 2)	0.0657186	-0.0183145	0.149752	0.125305	0.725855
Connectivity between precuneus/PCC DMN and right CON	Sports club/gym attendance (group 1)	-0.0590255	-0.134525	0.0164742	0.12543	0.725855
Connectivity between anterior DMN and lateral VN	Sports club/gym attendance (group 2)	-0.059809	-0.136345	0.016727	0.125598	0.725855
Connectivity between right FPN and CN	Adult educational classes (group 3)	-0.0879048	-0.200434	0.024624	0.125731	0.725855
Connectivity between left FPN and anterior DMN2	Leisure-time computer use (group 1)	0.158093	-0.0443109	0.360497	0.125779	0.725855
Connectivity between right FPN and AN	Leisure-time computer use (group 1)	-0.158114	-0.360765	0.044536	0.126188	0.725855
Connectivity between anterior DMN and BGN	Cumulative activity	0.0123426	-0.00347915	0.0281644	0.126251	0.725855
Connectivity between medial VN and left CON	Adult educational classes (group 3)	-0.0881997	-0.201373	0.0249732	0.126624	0.725855
Connectivity between AN and ECN	Family and friend visits (group 3)	-0.0624469	-0.142598	0.0177043	0.126732	0.725855
Connectivity between lateral VN and AN2	Family and friend visits (group 2)	0.0800295	-0.0227024	0.182761	0.126781	0.725855
Connectivity between SMN2 and AN2	Sports club/gym attendance (group 1)	-0.0584401	-0.133483	0.0166033	0.126909	0.725855
Connectivity between SMN and posterior DMN	Leisure-time computer use (group 2)	-0.12506	-0.285772	0.0356517	0.127196	0.725855
Connectivity between left FPN and posterior DMN2	Sports club/gym attendance (group 1)	0.0583055	-0.016652	0.133263	0.12735	0.725855
Connectivity between SMN2 and precuneus/PCC DMN	Family and friend visits (group 3)	-0.062186	-0.142151	0.0177791	0.12744	0.725855
Connectivity between medial VN and AN2	Adult educational classes (group 3)	0.0877086	-0.0251093	0.200527	0.127552	0.725855
Connectivity between left CON and anterior DMN2	Leisure-time computer use (group 1)	-0.157528	-0.360174	0.0451181	0.127591	0.725855
Connectivity between medial VN2 and anterior DMN2	Adult educational classes (group 2)	-0.0754835	-0.172619	0.0216521	0.127719	0.725855
Connectivity between anterior DMN2 and precuneus/PCC DMN	Sports club/gym attendance (group 1)	0.0580959	-0.016769	0.132961	0.128252	0.725855
Connectivity between medial VN2 and CN	Adult educational classes (group 1)	0.0668253	-0.0193882	0.153039	0.128693	0.725855
Connectivity between AN and right CON	Pubs/social clubs (group 1)	0.0645708	-0.0187518	0.147893	0.128774	0.725855
Connectivity between posterior DMN and CN	Pubs/social clubs (group 3)	0.046666	-0.0135975	0.106929	0.129062	0.725855
Connectivity between SMN and lateral VN2	Religious activities (group 3)	0.0449592	-0.0131771	0.103096	0.129569	0.725855
Connectivity between anterior DMN and CN	Sports club/gym attendance (group 2)	0.0581329	-0.0170608	0.133327	0.129684	0.725855
Connectivity between posterior DMN and SMN3	Leisure-time computer use (group 3)	0.110033	-0.0323782	0.252445	0.129915	0.725855
Connectivity between anterior DMN and left CON	Adult educational classes (group 2)	-0.0747845	-0.171624	0.0220545	0.130108	0.725855
Connectivity between right FPN and ECN	Sports club/gym attendance (group 3)	0.0418683	-0.0123555	0.0960922	0.130166	0.725855
Connectivity between anterior DMN and lateral VN	Cumulative activity	-0.0122664	-0.0281585	0.00362561	0.130305	0.725855
Connectivity between left FPN and AN2	Sports club/gym attendance (group 3)	0.0417725	-0.0123493	0.0958943	0.130323	0.725855
Connectivity between anterior DMN and CN	Religious activities (group 1)	0.114593	-0.0338949	0.263081	0.130368	0.725855
Connectivity between AN and SMN3	Family and friend visits (group 1)	0.0830304	-0.024565	0.190626	0.130389	0.725855
Connectivity between anterior DMN and posterior DMN2	Sports club/gym attendance (group 1)	-0.0577301	-0.132548	0.0170874	0.130428	0.725855
Connectivity between left CON and AN2	Leisure-time computer use (group 2)	0.12296	-0.0364178	0.282338	0.130484	0.725855
Connectivity between medial VN and CN	Pubs/social clubs (group 1)	0.0639155	-0.018991	0.146822	0.130766	0.725855
Connectivity between left CON and BGN	Sports club/gym attendance (group 3)	0.041732	-0.0124189	0.0958829	0.130902	0.725855
Connectivity between BGN and right CON	Sports club/gym attendance (group 2)	0.0587276	-0.0174883	0.134943	0.130962	0.725855
Connectivity between CN and ECN	Pubs/social clubs (group 1)	-0.0636865	-0.146363	0.0189896	0.131077	0.725855
Connectivity between medial VN and AN2	Sports club/gym attendance (group 2)	-0.0589513	-0.135481	0.0175786	0.131081	0.725855
Connectivity between SMN2 and BGN	Adult educational classes (group 2)	0.0739624	-0.0220811	0.170006	0.131187	0.725855
Global GM volume	Religious activities (group 2)	0.0500874	-0.0154942	0.115669	0.134396	0.725866
Global GM volume	Family and friend visits (group 3)	0.0296938	-0.00924672	0.0686343	0.135008	0.725866
Volume of GM in angular gyrus average	Adult educational classes (group 3)	0.0766206	-0.0232334	0.176475	0.132577	0.725866
Volume of GM in frontal operculum cortex average	Religious activities (group 2)	0.0884783	-0.0274418	0.204398	0.134636	0.725866
Volume of GM in inferior frontal gyrus pars opercularis average	Sports club/gym attendance (group 3)	0.0373316	-0.0115233	0.0861865	0.134197	0.725866
Volume of GM in insular cortex average	Sports club/gym attendance (group 1)	0.041244	-0.012373	0.0948609	0.131618	0.725866
Volume of GM in middle temporal gyrus posterior division average	Family and friend visits (group 3)	0.0486836	-0.0147536	0.112121	0.132525	0.725866
Volume of GM in occipital pole average	Leisure-time computer use (group 3)	0.0901818	-0.0280942	0.208458	0.135046	0.725866
Volume of GM in supramarginal gyrus anterior division average	Family and friend visits (group 3)	0.0549418	-0.0167775	0.126661	0.133214	0.725866
Volume of GM in temporal fusiform cortex posterior division average	Pubs/social clubs (group 1)	-0.0500066	-0.115407	0.015394	0.133948	0.725866
Volume of GM in ventral striatum average	Religious activities (group 2)	-0.0868592	-0.200177	0.0264587	0.13299	0.725866
Volume of GM in viiia cerebellum average	Family and friend visits (group 2)	0.0714569	-0.0216274	0.164541	0.13241	0.725866
Volume of GM in viiia cerebellum average	Adult educational classes (group 2)	0.0661665	-0.0203769	0.15271	0.133986	0.725866
Weighted mean MD in tract cingulate gyrus part of cingulum average	Religious activities (group 3)	-0.0437436	-0.10113	0.0136432	0.135154	0.725866
Connectivity between lateral VN and SMN3	Religious activities (group 2)	-0.103754	-0.238547	0.0310379	0.131366	0.725866
Connectivity between anterior DMN2 and AN2	Leisure-time computer use (group 2)	0.121845	-0.0365254	0.280216	0.13155	0.725866
Connectivity between left FPN and precuneus/PCC DMN	Leisure-time computer use (group 3)	0.109323	-0.0329688	0.251614	0.132086	0.725866
Connectivity between right FPN and BGN	Pubs/social clubs (group 2)	0.0641111	-0.0193857	0.147608	0.132325	0.725866
Connectivity between posterior DMN and medial VN2	Sports club/gym attendance (group 1)	-0.0576213	-0.132763	0.0175203	0.132825	0.725866
Connectivity between medial VN2 and AN2	Leisure-time computer use (group 3)	0.109296	-0.033249	0.251841	0.13287	0.725866
Connectivity between ECN and BGN	Religious activities (group 2)	0.103497	-0.031497	0.238491	0.132904	0.725866
Connectivity between anterior DMN and SMN2	Leisure-time computer use (group 2)	-0.122892	-0.283254	0.0374701	0.133076	0.725866
Connectivity between posterior DMN2 and anterior DMN2	Sports club/gym attendance (group 3)	0.041405	-0.0126557	0.0954657	0.133299	0.725866
Connectivity between medial VN2 and anterior DMN2	Religious activities (group 3)	0.0449507	-0.0137471	0.103649	0.13335	0.725866
Connectivity between anterior DMN and right CON	Religious activities (group 1)	-0.115406	-0.266153	0.0353419	0.133473	0.725866
Connectivity between CN and right CON	Sports club/gym attendance (group 1)	0.0575297	-0.0176534	0.132713	0.133656	0.725866
Connectivity between SMN and AN2	Religious activities (group 2)	0.103005	-0.0316657	0.237675	0.133824	0.725866
Connectivity between anterior DMN and AN	Family and friend visits (group 1)	0.0839419	-0.025873	0.193757	0.134063	0.725866
Connectivity between anterior DMN and CN	Pubs/social clubs (group 2)	-0.0631342	-0.145833	0.0195645	0.134558	0.725866
[truncated: 4,921 more rows]

## Sheet: Posthoc Cognitive results
Table S9: Posthoc results after the main cognitive analyses were repeated with the addition of a measure of cumulative activity. Group 1 = Weekly to low engagement; group 2 = low to weekly engagement; group 3 = stable weekly engagement. Note that the low stable group served as the reference group. Bold text indicates comparisons that survived multiple comparison corrections.
[truncated: 20 more rows]
